# Supplementary material for: Continuous flow synthesis of 1,4-disubstituted 1,2,3-triazoles via consecutive β-azidation of α,β-unsaturated carbonyl compounds and CuAAC reactions
Source: Royal Society of Chemistry journal article supplement (doi:10.1039/d2gc04672e), 2023-01-01

# Continuous flow synthesis of 1,4-disubstituted 1,2,3-triazoles *via* consecutive $\beta$ -azidation of $\alpha,\beta$ -unsaturated carbonyl compounds and CuAAC reaction.

Giulia Brufani,<sup>a†</sup> Federica Valentini,<sup>a†</sup> Gabriele Rossini,<sup>a</sup> Luigi Carpisassi,<sup>a</sup> Daniela Lanari,<sup>\*b</sup> Luigi Vaccaro<sup>\*a</sup>

<sup>a</sup>Laboratory of Green S.O.C. – Dipartimento di Chimica, Biologia e Biotecnologie, Università degli Studi di Perugia, Via Elce di Sotto 8, 06123 – Perugia – Italy;  
E-mail: [luigi.vaccaro@unipg.it](mailto:luigi.vaccaro@unipg.it); Web: <http://greensoc.chm.unipg.it/>

<sup>b</sup>Dipartimento di Scienze Farmaceutiche, Università degli Studi di Perugia, Via del Liceo 1, 06123 – Perugia – Italy;

<sup>†</sup> These authors contributed equally.

e-mail: [luigi.vaccaro@unipg.it](mailto:luigi.vaccaro@unipg.it)

[daniela.lanari@unipg.it](mailto:daniela.lanari@unipg.it)

## Table of Contents:

|                                                    |        |
|----------------------------------------------------|--------|
| 1. General Remarks                                 | ESI-2  |
| 2. General Procedures                              | ESI-3  |
| 3. Green metrics calculation                       | ESI-5  |
| 4. E-factor calculation (continuous flow protocol) | ESI-7  |
| 5. Characterization Data                           | ESI-10 |
| 6. NMR copies                                      | ESI-30 |

## 1. General Remarks

Unless otherwise stated, all chemicals were purchased and used without any further purification. GLC analyses were performed by using Hewlett-Packard HP 5890 SERIES II equipped with a capillary column DB-5MS (30 m, 0.32 mm), a FID detector, and helium as gas carrier. GC-EIMS analyses were carried out by using a Hewlett-Packard HP 6890N Network GC system/5975 mass selective detector equipped with an electron impact ionizer at 70 eV. Melting points were measured on a Büchi 510 apparatus. NMR spectra were recorded on a Bruker DRX-ADVANCE 400 MHz ( $^1\text{H}$  at 400 MHz,  $^{13}\text{C}$  at 100.6 MHz and  $^{19}\text{F}$  at 376.4 MHz) in  $\text{CDCl}_3$ . Chemical shifts are reported in ppm ( $\delta$ ), coupling constant (J) in hertz and multiplicity are reported as follows: *s* = singlet, *bs* = broad singlet, *d* = doublet, *dd* = double doublet, *td* = double triplet, *t* = triplet, *m* = multiplet. Elemental Analysis (EA) were conducted on Elementar UNICUBE® elemental analyzer. Metal contamination in the final products was measured using MP-AES 4210 instrument.

Pincer-type ligand 3,3-di(1H-imidazol-1-yl)propan-1-ol (**L**),<sup>1</sup> and **POLITAG-F** organocatalyst<sup>2</sup> were prepared as described in literature.

The aqueous acetonitrile azeotrope consists of 83.7 wt% of acetonitrile and 16.3 wt% of water.

Characterization data,  $^1\text{H}$ ,  $^{13}\text{C}$  and  $^{19}\text{F}$  NMR spectra are reported below.

## 2. General procedures

### Loading calculation of POLITAG-F.<sup>2</sup>

Loading of fluoride anions supported on polymer were determined by elemental analysis calculated on the *bis*-imidazolium units (C: 54.31; H: 6.02; N: 3.54; loading F<sup>-</sup>: 1.26 mmol/g).

### Continuous flow protocol for the synthesis of triazoles (4)

The mixture of **1** (5 mmol) and trimethylsilylazide (1.02 eq) in azeotrope CH<sub>3</sub>CN:H<sub>2</sub>O (1 mL, 5 M) was pumped through the PTFE reactor, packed with **POLITAG-F** (2.0 g) and quartz powder, thermostated at 60 °C (0.018 mL/min flow rate measured at the outlet of the first reactor). After a residence time of 3.8 h the resulting azide intermediate **2** formed was mixed, through a T joint, with a 1.2 M solution of terminal alkyne **3** (1.2 eq) in CH<sub>3</sub>CN:H<sub>2</sub>O azeotrope pumped at 0.1 mL/min. The obtained mixture was passed in a CTFR (10 m, 1/32" ID, 2 mL) heated at 100 °C with a BPR of 10 atm. The reactors were finally washed with 15 mL of aqueous azeotrope. The azeotrope was recovered by distillation affording in pure product **4**.

Table ESI-1. Optimization of the consecutive flow protocol.<sup>a</sup>

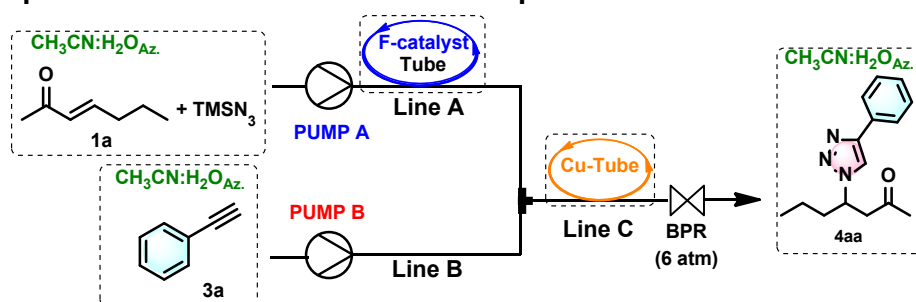

| entry             | Conc A (M) <sup>b</sup> | Conc B (M) <sup>c</sup> | mL/min A | mL/min B | TMSN <sub>3</sub> (eq) | 3a (eq) | 4aa (%) <sup>d</sup> |
|-------------------|-------------------------|-------------------------|----------|----------|------------------------|---------|----------------------|
| 1                 | 5                       | 1.0                     | 0.05     | 0.10     | 1.05                   | 1.0     | -                    |
| 2                 | 5                       | 1.0                     | 0.10     | 0.25     | 1.05                   | 1.0     | -                    |
| 3                 | 5                       | 1.0                     | 0.25     | 0.25     | 1.05                   | 1.0     | -                    |
| 4                 | 5                       | 1.0                     | 0.10     | 0.10     | 1.05                   | 1.0     | <5                   |
| 5                 | 5                       | 0.1                     | 0.10     | 0.10     | 1.05                   | 2.0     | <5                   |
| 6                 | 5                       | 1.2                     | 0.10     | 0.10     | 1.05                   | 2.0     | <5                   |
| 7 <sup>e</sup>    | 5                       | 1.2                     | 0.10     | 0.10     | 1.02                   | 1.2     | 25                   |
| 8 <sup>f</sup>    | 5                       | 1.2                     | 0.10     | 0.10     | 1.02                   | 1.2     | 30                   |
| 9 <sup>g</sup>    | 5                       | 1.2                     | 0.10     | 0.10     | 1.02                   | 1.2     | 27                   |
| 10 <sup>h,i</sup> | 5                       | 1.2                     | 0.10     | 0.10     | 1.02                   | 1.2     | 56                   |
| 11 <sup>h,j</sup> | 5                       | 1.2                     | 0.10     | 0.10     | 1.02                   | 1.2     | 70                   |
| 12 <sup>i</sup>   | 5                       | 1.2                     | 0.10     | 0.10     | 1.02                   | 1.2     | >99                  |
| 13 <sup>e,i</sup> | 5                       | 1.2                     | 0.10     | 0.10     | 1.02                   | 1.2     | 75                   |
| 14 <sup>f,i</sup> | 5                       | 1.2                     | 0.10     | 0.10     | 1.02                   | 1.2     | 84                   |
| 15 <sup>g,i</sup> | 5                       | 1.2                     | 0.10     | 0.10     | 1.02                   | 1.2     | 82                   |

<sup>a</sup>Reaction conditions: **1a** (5 mmol), 1st reactor (POLITAG-F, 0.2 g) thermostated at 60 °C; Cu-tube thermostated at 100 °C. BPR (6 atm). <sup>b</sup>Referred to **1a**. <sup>c</sup>Referred to **3a**. <sup>d</sup>Determined by GC analysis. <sup>e</sup>PS-DABCOF<sub>2</sub> catalyst<sup>3</sup> (0.346 g; loading: 7.4 mmol<sub>F</sub>/g). <sup>f</sup>IRA900-F catalyst<sup>4</sup> (0.983 g; loading: 2.6 mmol<sub>F</sub>/g). <sup>g</sup>POLITAG-M-F catalyst<sup>2</sup> (0.947 g; loading: 2.7 mmol<sub>F</sub>/g). <sup>h</sup>Cu-tube (5 m). <sup>i</sup>BPR (10 atm). <sup>j</sup>BPR (17 atm).

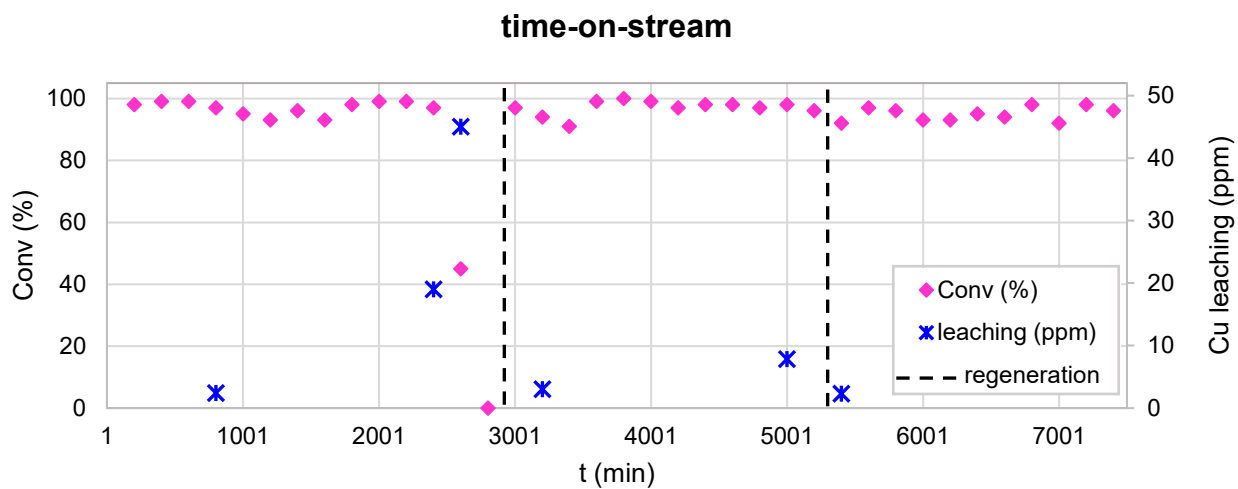

**Figure ESI-1.** Time on stream of the consecutive flow protocol for the synthesis of 1,4-disubstituted 1,2,3-triazoles.

### 3. Green Metrics Calculation<sup>5</sup>

| Batch                                                                                                                                                             | Flow                                                                                                                                                                   |
|-------------------------------------------------------------------------------------------------------------------------------------------------------------------|------------------------------------------------------------------------------------------------------------------------------------------------------------------------|
| <b>Reactants:</b><br><b>1a</b> = 112.17 mg (1 mmol)<br>TMSN <sub>3</sub> = 120.97 (1.05 eq)<br>H <sub>2</sub> O = 18.01 mg (1 eq)<br><b>3a</b> = 102.13 mg (1 eq) | <b>Reactants:</b><br><b>1a</b> = 560.85 mg (5 mmol)<br>TMSN <sub>3</sub> = 587.57 mg (1.02 eq)<br>H <sub>2</sub> O = 90.05 mg (1 eq)<br><b>3a</b> = 612.78 mg (1.2 eq) |
| <b>Solvent:</b><br>CH <sub>3</sub> CN/H <sub>2</sub> O <sub>Az.</sub> = 1 mL                                                                                      | <b>Solvent:</b><br>CH <sub>3</sub> CN/H <sub>2</sub> O <sub>Az.</sub> = 6 mL                                                                                           |
| <b>Work-up:</b><br>CH <sub>3</sub> CN/H <sub>2</sub> O <sub>Az.</sub> = 2 mL                                                                                      | <b>Work-up:</b><br>CH <sub>3</sub> CN/H <sub>2</sub> O <sub>Az.</sub> = 15 mL                                                                                          |
| <b>Purification:</b><br>CH <sub>3</sub> CN/H <sub>2</sub> O <sub>Az.</sub> = 0.5mL                                                                                | <b>Purification:</b><br>Not performed                                                                                                                                  |
| <b>Recovered materials:</b><br>CH <sub>3</sub> CN/H <sub>2</sub> O <sub>Az.</sub> [solvent+work-up] = 2.67 mL (89 %)                                              | <b>Recovered materials:</b><br>CH <sub>3</sub> CN/H <sub>2</sub> O <sub>Az.</sub> [solvent+work-up] = 19.74 mL (94 %)                                                  |
| <b>Product:</b><br><b>4aa</b> = 241.9 mg (94 % yield)                                                                                                             | <b>Product:</b><br><b>4aa</b> = 1.248 g (97 % yield)                                                                                                                   |
| <b>E-factor</b> = 3.25                                                                                                                                            | <b>E-factor</b> = 1.27                                                                                                                                                 |
| <b>AE</b> = 0.741                                                                                                                                                 | <b>AE</b> = 0.741                                                                                                                                                      |
| <b>Rxn Yield</b> = 0.940                                                                                                                                          | <b>Rxn Yield</b> = 0.970                                                                                                                                               |
| <b>1/SF</b> = 0.984                                                                                                                                               | <b>1/SF</b> = 0.939                                                                                                                                                    |
| <b>MRP</b> = 0.343                                                                                                                                                | <b>MRP</b> = 0.654                                                                                                                                                     |
| <b>RME</b> = 0.235                                                                                                                                                | <b>RME</b> = 0.441                                                                                                                                                     |
| <b>VMR</b> = 0.717327917                                                                                                                                          | <b>VMR</b> = 0.773582143                                                                                                                                               |

#### Atom Economy (AE)

$$AE = \frac{MW_{product}}{\sum_j v_j MW_{reactant}}$$

#### Stoichiometric Factor (SF)

$$SF = 1 + \frac{m_{excess\ reagents}}{m_{stoichiometric\ reagents}}$$

#### Reaction Mass Efficiency (RME)

$$RME = \frac{1}{1 + E\ factor}$$

#### Mass Recovery Parameter (MRP)

$$MRP = \frac{RME \cdot SF}{AE \cdot \left(\frac{yield}{100}\right)}$$

## References

1. V. Kozell, F. Rahmani, O. Piermatti, D. Lanari, L. Vaccaro, *Mol. Catal.* **2018**, *455*, 188–191
2. F. Ferlin, F. Valentini, G. Brufani, D. Lanari, L. Vaccaro *ACS Sustainable Chem. Eng.* **2021**, *9*, 5740–5749
3. T. Angelini, D. Lanari, R. Maggi, F. Pizzo, G. Sartori, L. Vaccaro, *Adv. Synth. Catal.*, **2012**, *354*, 908-916
4. L. Castrica, F. Fringuelli, L. Gregoli, F. Pizzo, L. Vaccaro, *J. Org. Chem.* **2006**, *71*, 9536–9539
5. J. Andraos, A. Hent, *J. Chem. Educ.* **2015**, *92*, 1820–1830

#### 4. E-factor calculation (continuous flow protocol)

$\beta$ -Azidation of **1a** and consecutive CuAAC with **3a**:

$$\text{E-factor} = [560.85 \text{ mg (1a)} + 90.05 \text{ mg (H}_2\text{O)} + 587.57 \text{ mg (TMSN}_3\text{)} + 612.78 \text{ mg (3a)} + 980.00 \text{ mg (CH}_3\text{CN/H}_2\text{O}_{\text{Az. not recovered)}}] - 1248.00 \text{ mg (4aa)} / 1248.00 \text{ mg (4aa)} = 1.3$$

$\beta$ -Azidation of **1b** and consecutive CuAAC with **3a**:

$$\text{E-factor} = [701.10 \text{ mg (1b)} + 90.05 \text{ mg (H}_2\text{O)} + 587.57 \text{ mg (TMSN}_3\text{)} + 612.78 \text{ mg (3a)} + 980.00 \text{ mg (CH}_3\text{CN/H}_2\text{O}_{\text{Az. not recovered)}}] - 1384.12 \text{ mg (4ba)} / 1384.12 \text{ mg (4ba)} = 1.2$$

$\beta$ -Azidation of **1a** and consecutive CuAAC with **3b**:

$$\text{E-factor} = [560.85 \text{ mg (1a)} + 90.05 \text{ mg (H}_2\text{O)} + 587.57 \text{ mg (TMSN}_3\text{)} + 792.96 \text{ mg (3b)} + 980.00 \text{ mg (CH}_3\text{CN/H}_2\text{O}_{\text{Az. not recovered)}}] - 1408.06 \text{ mg (4ab)} / 1408.06 \text{ mg (4ab)} = 1.1$$

$\beta$ -Azidation of **1b** and consecutive CuAAC with **3b**:

$$\text{E-factor} = [701.10 \text{ mg (1b)} + 90.05 \text{ mg (H}_2\text{O)} + 587.57 \text{ mg (TMSN}_3\text{)} + 792.96 \text{ mg (3b)} + 980.00 \text{ mg (CH}_3\text{CN/H}_2\text{O}_{\text{Az. not recovered)}}] - 1545.55 \text{ mg (4bb)} / 1545.55 \text{ mg (4bb)} = 1.0$$

$\beta$ -Azidation of **1a** and consecutive CuAAC with **3c**:

$$\text{E-factor} = [560.85 \text{ mg (1a)} + 90.05 \text{ mg (H}_2\text{O)} + 587.57 \text{ mg (TMSN}_3\text{)} + 1086.18 \text{ mg (3c)} + 980.00 \text{ mg (CH}_3\text{CN/H}_2\text{O}_{\text{Az. not recovered)}}] - 1646.82 \text{ mg (4ac)} / 1646.82 \text{ mg (4ac)} = 1.0$$

$\beta$ -Azidation of **1b** and consecutive CuAAC with **3c**:

$$\text{E-factor} = [701.10 \text{ mg (1b)} + 90.05 \text{ mg (H}_2\text{O)} + 587.57 \text{ mg (TMSN}_3\text{)} + 1086.18 \text{ mg (3c)} + 980.00 \text{ mg (CH}_3\text{CN/H}_2\text{O}_{\text{Az. not recovered)}}] - 1784.49 \text{ mg (4bc)} / 1784.49 \text{ mg (4bc)} = 0.9$$

$\beta$ -Azidation of **1a** and consecutive CuAAC with **3d**:

$$\text{E-factor} = [560.85 \text{ mg (1a)} + 90.05 \text{ mg (H}_2\text{O)} + 587.57 \text{ mg (TMSN}_3\text{)} + 1020.78 \text{ mg (3d)} + 980.00 \text{ mg (CH}_3\text{CN/H}_2\text{O}_{\text{Az. not recovered)}}] - 1495.67 \text{ mg (4ad)} / 1495.67 \text{ mg (4ad)} = 1.2$$

$\beta$ -Azidation of **1b** and consecutive CuAAC with **3d**:

$$\text{E-factor} = [701.10 \text{ mg (1b)} + 90.05 \text{ mg (H}_2\text{O)} + 587.57 \text{ mg (TMSN}_3\text{)} + 1020.78 \text{ mg (3d)} + 980.00 \text{ mg (CH}_3\text{CN/H}_2\text{O}_{\text{Az. not recovered)}}] - 1730.6 \text{ mg (4bd)} / 1730.6 \text{ mg (4bd)} = 1.0$$

$\beta$ -Azidation of **1a** and consecutive CuAAC with **3e**:

$$\text{E-factor} = [560.85 \text{ mg (1a)} + 90.05 \text{ mg (H}_2\text{O)} + 587.57 \text{ mg (TMSN}_3\text{)} + 696.96 \text{ mg (3e)} + 980.00 \text{ mg (CH}_3\text{CN/H}_2\text{O}_{\text{Az. not recovered)}}] - 1248.59 \text{ mg (4ae)} / 1248.59 \text{ mg (4ae)} = 1.3$$

$\beta$ -Azidation of **1b** and consecutive CuAAC with **3e**:

E-factor = [701.10 mg (**1b**) + 90.05 mg (H<sub>2</sub>O) + 587.57 mg (TMSN<sub>3</sub>) + 696.96 mg (**3e**) + 980.00 mg (CH<sub>3</sub>CN/H<sub>2</sub>O<sub>Az.</sub> not recovered) – 1481.85 mg (**4be**)] / 1481.85 mg (**4be**) = 1.1

β-Azidation of **1a** and consecutive CuAAC with **3f**:

E-factor = [560.85 mg (**1a**) + 90.05 mg (H<sub>2</sub>O) + 587.57 mg (TMSN<sub>3</sub>) + 1482.78 mg (**3a**) + 980.00 mg (CH<sub>3</sub>CN/H<sub>2</sub>O<sub>Az.</sub> not recovered) – 1908.55 mg (**4af**)] / 1908.55 mg (**4af**) = 0.9

β-Azidation of **1b** and consecutive CuAAC with **3f**:

E-factor = [701.10 mg (**1b**) + 90.05 mg (H<sub>2</sub>O) + 587.57 mg (TMSN<sub>3</sub>) + 1482.78 mg (**3a**) + 980.00 mg (CH<sub>3</sub>CN/H<sub>2</sub>O<sub>Az.</sub> not recovered) – 2021.88 mg (**4bf**)] / 2021.88 mg (**4bf**) = 0.9

β-Azidation of **1a** and consecutive CuAAC with **3g**:

E-factor = [560.85 mg (**1a**) + 90.05 mg (H<sub>2</sub>O) + 587.57 mg (TMSN<sub>3</sub>) + 648.96 mg (**3g**) + 980.00 mg (CH<sub>3</sub>CN/H<sub>2</sub>O<sub>Az.</sub> not recovered) – 1211.69 mg (**4ag**)] / 1211.69 mg (**4ag**) = 1.4

β-Azidation of **1b** and consecutive CuAAC with **3g**:

E-factor = [701.10 mg (**1b**) + 90.05 mg (H<sub>2</sub>O) + 587.57 mg (TMSN<sub>3</sub>) + 648.96 mg (**3g**) + 980.00 mg (CH<sub>3</sub>CN/H<sub>2</sub>O<sub>Az.</sub> not recovered) – 1413.91 mg (**4bg**)] / 1413.91 mg (**4bg**) = 1.1

β-Azidation of **1a** and consecutive CuAAC with **3h**:

E-factor = [560.85 mg (**1a**) + 90.05 mg (H<sub>2</sub>O) + 587.57 mg (TMSN<sub>3</sub>) + 492.84 mg (**3h**) + 980.00 mg (CH<sub>3</sub>CN/H<sub>2</sub>O<sub>Az.</sub> not recovered) – 1101.49 mg (**4ah**)] / 1101.49 mg (**4ah**) = 1.5

β-Azidation of **1b** and consecutive CuAAC with **3h**:

E-factor = [701.10 mg (**1b**) + 90.05 mg (H<sub>2</sub>O) + 587.57 mg (TMSN<sub>3</sub>) + 492.84 mg (**3h**) + 980.00 mg (CH<sub>3</sub>CN/H<sub>2</sub>O<sub>Az.</sub> not recovered) – 1235.13 mg (**4bh**)] / 1235.13 mg (**4bh**) = 1.3

β-Azidation of **1a** and consecutive CuAAC with **3i**:

E-factor = [560.85 mg (**1a**) + 90.05 mg (H<sub>2</sub>O) + 587.57 mg (TMSN<sub>3</sub>) + 661.20 mg (**3i**) + 980.00 mg (CH<sub>3</sub>CN/H<sub>2</sub>O<sub>Az.</sub> not recovered) – 1166.45 mg (**4ai**)] / 1166.45 mg (**4ai**) = 1.5

β-Azidation of **1b** and consecutive CuAAC with **3i**:

E-factor = [701.10 mg (**1b**) + 90.05 mg (H<sub>2</sub>O) + 587.57 mg (TMSN<sub>3</sub>) + 661.20 mg (**3i**) + 980.00 mg (CH<sub>3</sub>CN/H<sub>2</sub>O<sub>Az.</sub> not recovered) – 1290.39 mg (**4ai**)] / 1290.39 mg (**4ai**) = 1.3

β-Azidation of **1a** and consecutive CuAAC with **3j**:

E-factor = [560.85 mg (**1a**) + 90.05 mg (H<sub>2</sub>O) + 587.57 mg (TMSN<sub>3</sub>) + 649.08 mg (**3j**) + 980.00 mg (CH<sub>3</sub>CN/H<sub>2</sub>O<sub>Az.</sub> not recovered) – 1092.83 mg (**4aj**)] / 1092.83 mg (**4aj**) = 1.6



$\beta$ -Azidation of **1b** and consecutive CuAAC with **3j**:

E-factor = [701.10 mg (**1b**) + 90.05 mg (H<sub>2</sub>O) + 587.57 mg (TMSN<sub>3</sub>) + 649.08 mg (**3j**) + 980.00 mg (CH<sub>3</sub>CN/H<sub>2</sub>O<sub>Az.</sub> not recovered) – 1354.97 mg (**4bj**)] / 1354.97 mg (**4bj**) = 1.2

## 5. Characterization data

| Chem. Name                                                                                                                                                                                                                                                                                                                                                                                                                                                                                                                                                                                                                                                                                                                                                                                                  | 4-(4-phenyl-1H-1,2,3-triazol-1-yl)heptan-2-one (4aa) |                                                  |              |                   |          |
|-------------------------------------------------------------------------------------------------------------------------------------------------------------------------------------------------------------------------------------------------------------------------------------------------------------------------------------------------------------------------------------------------------------------------------------------------------------------------------------------------------------------------------------------------------------------------------------------------------------------------------------------------------------------------------------------------------------------------------------------------------------------------------------------------------------|------------------------------------------------------|--------------------------------------------------|--------------|-------------------|----------|
| <p style="text-align: center;">M.W.: 257.34 g/mol</p>                                                                                                                                                                                                                                                                                                                                                                                                                                                                                                                                                                                                                                                                                                                                                       |                                                      |                                                  |              |                   |          |
| <b>METHOD:</b>                                                                                                                                                                                                                                                                                                                                                                                                                                                                                                                                                                                                                                                                                                                                                                                              |                                                      |                                                  |              |                   |          |
| <p>The mixture of <b>1a</b> (5 mmol) and trimethylsilylazide (0.67 mL, 1.02 eq) in azeotrope CH<sub>3</sub>CN:H<sub>2</sub>O (1 mL, 5 M) was pumped through the PTFE reactor, thermostated at 60 °C, packed with <b>POLITAG-F</b> (2.0 g) and quartz powder (0.018 mL/min flow rate measured at the outlet of the first reactor). After a residence time of 3.8 h the resulting azide intermediate formed was mixed, through a T joint, with a 1.2 M solution of phenylacetylene <b>3a</b> (1.2 eq) in CH<sub>3</sub>CN:H<sub>2</sub>O azeotrope continuously pumped at 0.1 mL/min. This mixture was passed in a CTRF heated at 100 °C with a BPR of 10 atm. The azeotrope was recovered by distillation affording in <b>4aa</b> pure product as white solid (1.248 g, 97 % yield, &gt;98% NMR purity).</p> |                                                      |                                                  |              |                   |          |
| <b>Mol Formula</b>                                                                                                                                                                                                                                                                                                                                                                                                                                                                                                                                                                                                                                                                                                                                                                                          |                                                      | C <sub>15</sub> H <sub>19</sub> N <sub>3</sub> O |              | <b>m. p.</b>      | 68-71 °C |
| <b><sup>1</sup>H NMR (400 MHz, DMSO-<i>d</i><sub>6</sub>)</b>                                                                                                                                                                                                                                                                                                                                                                                                                                                                                                                                                                                                                                                                                                                                               | <b>δ Value</b>                                       | <b>No. H</b>                                     | <b>Mult.</b> | <b>j Value/Hz</b> |          |
|                                                                                                                                                                                                                                                                                                                                                                                                                                                                                                                                                                                                                                                                                                                                                                                                             | 8.65                                                 | 1                                                | <i>s</i>     |                   |          |
|                                                                                                                                                                                                                                                                                                                                                                                                                                                                                                                                                                                                                                                                                                                                                                                                             | 7.83                                                 | 2                                                | <i>d</i>     | 7.6               |          |
|                                                                                                                                                                                                                                                                                                                                                                                                                                                                                                                                                                                                                                                                                                                                                                                                             | 7.44                                                 | 2                                                | <i>t</i>     | 7.6               |          |
|                                                                                                                                                                                                                                                                                                                                                                                                                                                                                                                                                                                                                                                                                                                                                                                                             | 7.32                                                 | 1                                                | <i>t</i>     | 7.5               |          |
|                                                                                                                                                                                                                                                                                                                                                                                                                                                                                                                                                                                                                                                                                                                                                                                                             | 4.97-4.95                                            | 2                                                | <i>m</i>     |                   |          |
|                                                                                                                                                                                                                                                                                                                                                                                                                                                                                                                                                                                                                                                                                                                                                                                                             | 3.32-3.35                                            | 1                                                | <i>m</i>     |                   |          |
|                                                                                                                                                                                                                                                                                                                                                                                                                                                                                                                                                                                                                                                                                                                                                                                                             | 3.13                                                 | 1                                                | <i>dd</i>    | 17.8-5.4          |          |
|                                                                                                                                                                                                                                                                                                                                                                                                                                                                                                                                                                                                                                                                                                                                                                                                             | 2.09                                                 | 3                                                | <i>s</i>     |                   |          |
|                                                                                                                                                                                                                                                                                                                                                                                                                                                                                                                                                                                                                                                                                                                                                                                                             | 1.85-1.74                                            | 1                                                | <i>m</i>     |                   |          |
|                                                                                                                                                                                                                                                                                                                                                                                                                                                                                                                                                                                                                                                                                                                                                                                                             | 1-17-1.13                                            | 1                                                | <i>m</i>     |                   |          |
|                                                                                                                                                                                                                                                                                                                                                                                                                                                                                                                                                                                                                                                                                                                                                                                                             | 1.10-1.05                                            | 1                                                | <i>m</i>     |                   |          |
| 0.83                                                                                                                                                                                                                                                                                                                                                                                                                                                                                                                                                                                                                                                                                                                                                                                                        | 3                                                    | <i>t</i>                                         | 7.4          |                   |          |
| <b><sup>13</sup>C NMR (100.6 MHz, DMSO-<i>d</i><sub>6</sub>) δ</b> : 205.4, 145.9, 130.8, 128.9, 127.8, 125.0, 120.7, 56.3, 47.4, 36.9, 29.9, 18.4, 13.3                                                                                                                                                                                                                                                                                                                                                                                                                                                                                                                                                                                                                                                    |                                                      |                                                  |              |                   |          |
| <b>GC-EIMS (m/z, %):</b> 257 (M <sup>+</sup> , 40); 186 (27); 145 (70); 118 (23); 117 (100); 116 (80); 113 (24); 91 (21); 90 (21); 89 (32).                                                                                                                                                                                                                                                                                                                                                                                                                                                                                                                                                                                                                                                                 |                                                      |                                                  |              |                   |          |

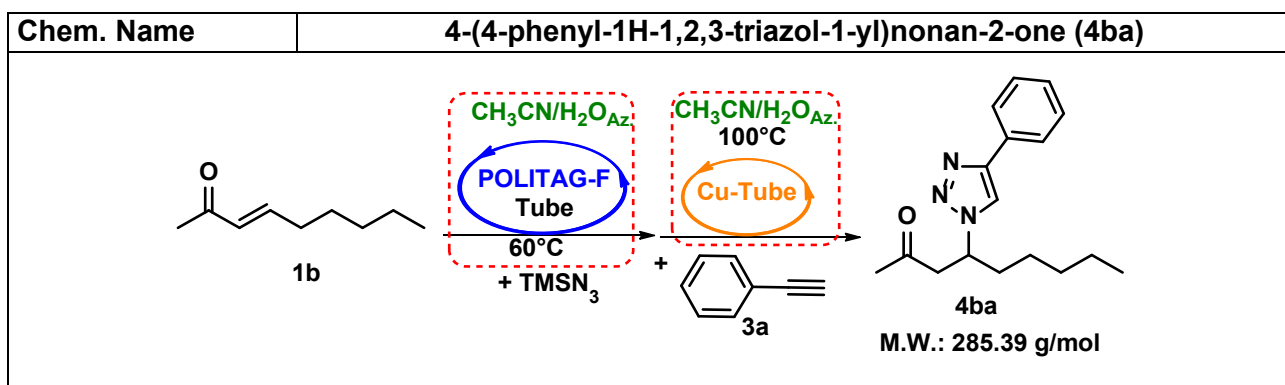

**METHOD:**

The mixture of **1b** (5 mmol) and trimethylsilylazide (0.67 mL, 1.02 eq) in azeotrope CH<sub>3</sub>CN:H<sub>2</sub>O (1 mL, 5 M) was pumped through the PTFE reactor, thermostated at 60 °C, packed with **POLITAG-F** (2.0 g) and quartz powder (0.018 mL/min flow rate measured at the outlet of the first reactor). After a residence time of 3.8 h the resulting azide intermediate formed was mixed, through a T joint, with a 1.2 M solution of phenylacetylene **3a** (1.2 eq) in CH<sub>3</sub>CN:H<sub>2</sub>O azeotrope continuously pumped at 0.1 mL/min. This mixture was passed in a CTFR heated at 100 °C with a BPR of 10 atm. The azeotrope was recovered by distillation affording in **4ba** pure product as white solid (1.384 g, 97 % yield).

| Mol Formula                                          |                | C <sub>17</sub> H <sub>23</sub> N <sub>3</sub> O |              | m. p.             | 64-67 °C |
|------------------------------------------------------|----------------|--------------------------------------------------|--------------|-------------------|----------|
| <b><sup>1</sup>H NMR (400 MHz, CDCl<sub>3</sub>)</b> | <b>δ Value</b> | <b>No. H</b>                                     | <b>Mult.</b> | <b>j Value/Hz</b> |          |
|                                                      | 7.83           | 2                                                | <i>d</i>     | 7.5               |          |
|                                                      | 7.79           | 1                                                | <i>s</i>     |                   |          |
|                                                      | 7.41           | 2                                                | <i>t</i>     | 7.4               |          |
|                                                      | 7.33-7.30      | 1                                                | <i>m</i>     |                   |          |
|                                                      | 4.96-4.89      | 1                                                | <i>m</i>     |                   |          |
|                                                      | 3.42           | 1                                                | <i>dd</i>    | 18.4-8.6          |          |
|                                                      | 2.95           | 1                                                | <i>dd</i>    | 18.0-4.4          |          |
|                                                      | 2.12           | 3                                                | <i>s</i>     |                   |          |
|                                                      | 2.09-2.04      | 1                                                | <i>m</i>     |                   |          |
|                                                      | 1.88-1.82      | 1                                                | <i>m</i>     |                   |          |
|                                                      | 1.30-1.20      | 5                                                | <i>m</i>     |                   |          |
| 1.13-1.11                                            | 1              | <i>m</i>                                         |              |                   |          |
| 0.86-0.84                                            | 3              | <i>m</i>                                         |              |                   |          |

**<sup>13</sup>C NMR (100.6 MHz, CDCl<sub>3</sub>) δ** : 205.4, 147.0, 130.8, 128.9, 128.2, 125.8, 120.7, 57.3, 48.4, 35.3, 31.3, 30.6, 25.7, 22.5, 14.1

**GC-EIMS (m/z, %)**: 285 (M<sup>+</sup>, 43); 242 (28); 186 (36); 144 (22), 123 (27); 118 (100); 116 (76); 102 (28); 91 (19); 90 (22); 43 (89).

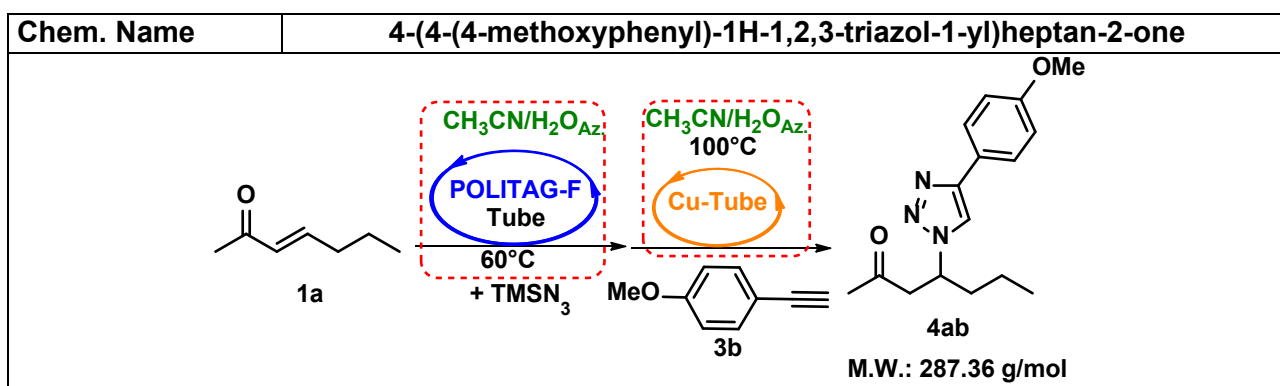

**METHOD:**

The mixture of **1a** (5 mmol) and trimethylsilylazide (0.67 mL, 1.02 eq) in azeotrope CH<sub>3</sub>CN:H<sub>2</sub>O (1 mL, 5 M) was pumped through the PTFE reactor, thermostated at 60 °C, packed with **POLITAG-F** (2.0 g) and quartz powder (0.018 mL/min flow rate measured at the outlet of the first reactor). After a residence time of 3.8 h the resulting azide intermediate formed was mixed, through a T joint, with a 1.2 M solution of 1-ethynyl-4-methoxybenzene **3b** (1.2 eq) in CH<sub>3</sub>CN:H<sub>2</sub>O azeotrope continuously pumped at 0.1 mL/min. This mixture was passed in a CTRF heated at 100 °C with a BPR of 10 atm.

The azeotrope was recovered by distillation affording in **4ba** pure product as white solid (1.408 g, 98 % yield).

| <b>Mol Formula</b>                                                    |                | C <sub>16</sub> H <sub>21</sub> N <sub>3</sub> O <sub>2</sub> |              | <b>m. p.</b>      | 104-107 °C |
|-----------------------------------------------------------------------|----------------|---------------------------------------------------------------|--------------|-------------------|------------|
| <b><sup>1</sup>H NMR<br/>(400 MHz,<br/>DMSO-<i>d</i><sub>6</sub>)</b> | <b>δ Value</b> | <b>No. H</b>                                                  | <b>Mult.</b> | <b>j Value/Hz</b> |            |
|                                                                       | 8.52           | 1                                                             | s            |                   |            |
|                                                                       | 7.75           | 2                                                             | d            | 8.7               |            |
|                                                                       | 7.70           | 2                                                             | d            | 8.7               |            |
|                                                                       | 4.97-4.90      | 1                                                             | m            |                   |            |
|                                                                       | 3.78           | 3                                                             | s            |                   |            |
|                                                                       | 3.27           | 1                                                             | dd           | 17.9-8.3          |            |
|                                                                       | 3.12           | 1                                                             | dd           | 17.7-5.3          |            |
|                                                                       | 2.08           | 3                                                             | s            |                   |            |
|                                                                       | 1.87-1.71      | 2                                                             | m            |                   |            |
|                                                                       | 1.18-1.09      | 1                                                             | m            |                   |            |
|                                                                       | 1.08-1.01      | 1                                                             | m            |                   |            |
|                                                                       | 1.83           | 3                                                             | t            | 7.3               |            |

**<sup>13</sup>C NMR (100.6 MHz, DMSO-*d*<sub>6</sub>) δ** : 205.5, 158.9, 145.9, 126.4, 123.5, 119.7, 114.3, 56.2, 55.1, 47.4, 36.9, 30.0, 18.4, 13.3

**GC-EIMS (m/z, %):** 287 (M<sup>+</sup>,75); 244 (97); 216 (98); 202 (25); 189 (33); 188 (28); 175 (22); 174 (20); 173 (27); 158 (23); 147 (100); 146 (78); 133 (32); 132 (80); 121 (23); 119 (23); 117 (20); 89 (22).

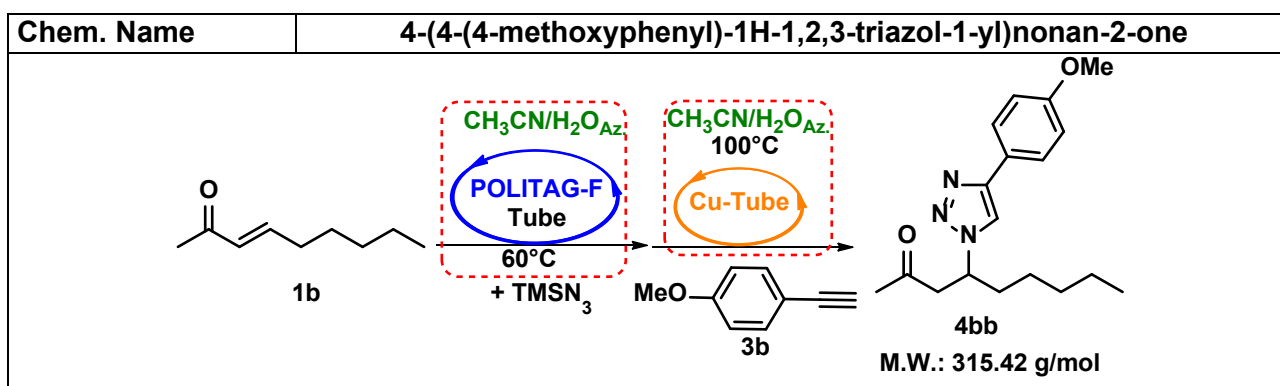

**METHOD:**

The mixture of **1b** (5 mmol) and trimethylsilylazide (0.67 mL, 1.02 eq) in azeotrope CH<sub>3</sub>CN:H<sub>2</sub>O (1 mL, 5 M) was pumped through the PTFE reactor, thermostated at 60 °C, packed with **POLITAG-F** (2.0 g) and quartz powder (0.018 mL/min flow rate measured at the outlet of the first reactor). After a residence time of 3.8 h the resulting azide intermediate formed was mixed, through a T joint, with a 1.2 M solution of 1-ethynyl-4-methoxybenzene **3b** (1.2 eq) in CH<sub>3</sub>CN:H<sub>2</sub>O azeotrope continuously pumped at 0.1 mL/min. This mixture was passed in a CTRF heated at 100 °C with a BPR of 10 atm.

The azeotrope was recovered by distillation affording in **4ba** pure product as white solid (1.546 g, 98 % yield, 95% NMR purity).

| <b>Mol Formula</b>                                                                                                                                                                                                                                                                                                                                        |                | C <sub>18</sub> H <sub>25</sub> N <sub>3</sub> O <sub>2</sub> |              | <b>m. p.</b>      | 99-103 °C |
|-----------------------------------------------------------------------------------------------------------------------------------------------------------------------------------------------------------------------------------------------------------------------------------------------------------------------------------------------------------|----------------|---------------------------------------------------------------|--------------|-------------------|-----------|
| <b><sup>1</sup>H NMR (400 MHz, CDCl<sub>3</sub>)</b>                                                                                                                                                                                                                                                                                                      | <b>δ Value</b> | <b>No. H</b>                                                  | <b>Mult.</b> | <b>j Value/Hz</b> |           |
|                                                                                                                                                                                                                                                                                                                                                           | 7.75           | 2                                                             | <i>d</i>     | 8.6               |           |
|                                                                                                                                                                                                                                                                                                                                                           | 7.70           | 1                                                             | <i>s</i>     |                   |           |
|                                                                                                                                                                                                                                                                                                                                                           | 6.95           | 2                                                             | <i>d</i>     | 8.7               |           |
|                                                                                                                                                                                                                                                                                                                                                           | 4.94-4.88      | 1                                                             | <i>m</i>     |                   |           |
|                                                                                                                                                                                                                                                                                                                                                           | 3.84           | 3                                                             | <i>s</i>     |                   |           |
|                                                                                                                                                                                                                                                                                                                                                           | 3.41           | 1                                                             | <i>dd</i>    | 17.9-8.3          |           |
|                                                                                                                                                                                                                                                                                                                                                           | 2.94           | 1                                                             | <i>dd</i>    | 17.8-4.7          |           |
|                                                                                                                                                                                                                                                                                                                                                           | 2.12           | 3                                                             | <i>s</i>     |                   |           |
|                                                                                                                                                                                                                                                                                                                                                           | 2.08-2.01      | 1                                                             | <i>m</i>     |                   |           |
|                                                                                                                                                                                                                                                                                                                                                           | 1.88-1.80      | 1                                                             | <i>m</i>     |                   |           |
|                                                                                                                                                                                                                                                                                                                                                           | 1.27-1.20      | 5                                                             | <i>m</i>     |                   |           |
| 1.17-1.04                                                                                                                                                                                                                                                                                                                                                 | 1              | <i>m</i>                                                      |              |                   |           |
| 0.84                                                                                                                                                                                                                                                                                                                                                      | 3              | <i>t</i>                                                      | 6.3          |                   |           |
| <b><sup>13</sup>C NMR (100.6 MHz, CDCl<sub>3</sub>) δ:</b> 205.5; 159.7; 146.9; 127.1; 123.5; 119.9; 114.3; 57.3; 55.5; 48.4; 35.3; 31.3; 30.6; 25.7; 22.5; 14.1.                                                                                                                                                                                         |                |                                                               |              |                   |           |
| <b>GC-EIMS (m/z, %):</b> 315 (M <sup>+</sup> , 72); 272 (67); 244 (33); 231 (20); 230 (23); 229 (33); 216 (51); 207 (27); 189 (23); 188 (48); 176 (25); 175 (100); 174 (29); 160 (37); 159 (20); 148 (28); 147 (90); 146 (42); 133 (48); 132 (94); 125 (28); 121 (23); 119 (23); 104 (27); 97 (29); 89 (20); 83 (21); 77 (25); 69 (27); 68 (24); 55 (47). |                |                                                               |              |                   |           |

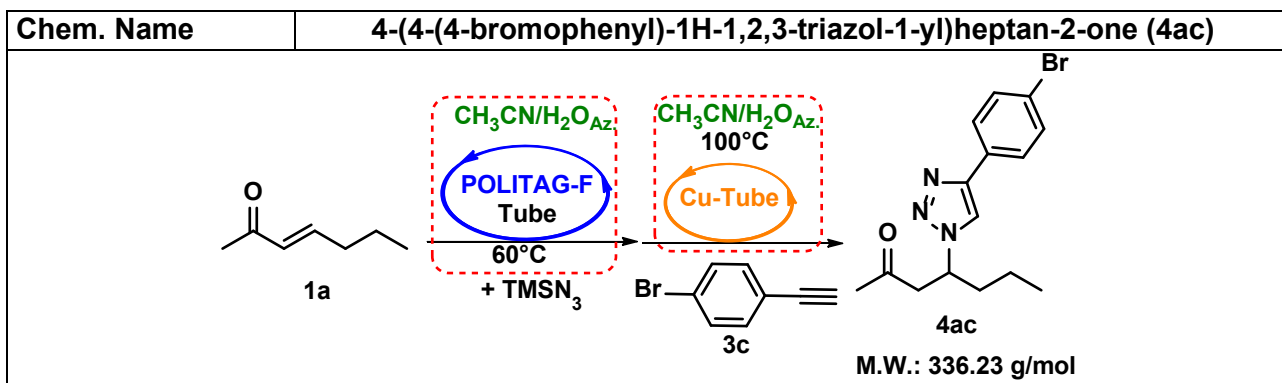

**METHOD:**

The mixture of **1a** (5 mmol) and trimethylsilylazide (0.67 mL, 1.02 eq) in azeotrope CH<sub>3</sub>CN:H<sub>2</sub>O (1 mL, 5 M) was pumped through the PTFE reactor, thermostated at 60 °C, packed with **POLITAG-F** (2.0 g) and quartz powder (0.018 mL/min flow rate measured at the outlet of the first reactor). After a residence time of 3.8 h the resulting azide intermediate formed was mixed, through a T joint, with a 1.2 M solution of 1-bromo-4-ethynylbenzene **3c** (1.2 eq) in CH<sub>3</sub>CN:H<sub>2</sub>O azeotrope continuously pumped at 0.1 mL/min. This mixture was passed in a CTRF heated at 100 °C with a BPR of 10 atm.

The azeotrope was recovered by distillation affording in **4ac** pure product as white solid (1.648 g, 98 % yield).

| <b>Mol Formula</b>                                           |                | <b>C<sub>15</sub>H<sub>18</sub>BrN<sub>3</sub>O</b> |              | <b>m. p.</b>      | <b>118-122 °C</b> |
|--------------------------------------------------------------|----------------|-----------------------------------------------------|--------------|-------------------|-------------------|
| <b><sup>1</sup>H NMR<br/>(400 MHz,<br/>CDCl<sub>3</sub>)</b> | <b>δ Value</b> | <b>No. H</b>                                        | <b>Mult.</b> | <b>j Value/Hz</b> |                   |
|                                                              | 7.80           | 1                                                   | <i>s</i>     |                   |                   |
|                                                              | 7.70           | 2                                                   | <i>d</i>     | 8.4               |                   |
|                                                              | 7.53           | 2                                                   | <i>d</i>     | 8.4               |                   |
|                                                              | 4.97-4.90      | 1                                                   | <i>m</i>     |                   |                   |
|                                                              | 3.43           | 1                                                   | <i>dd</i>    | 18.0-8.6          |                   |
|                                                              | 2.95           | 1                                                   | <i>dd</i>    | 18.0-4.7          |                   |
|                                                              | 2.12           | 3                                                   | <i>s</i>     |                   |                   |
|                                                              | 2.09-2.02      | 1                                                   | <i>m</i>     |                   |                   |
|                                                              | 1.87-1.78      | 1                                                   | <i>m</i>     |                   |                   |
|                                                              | 1.31-1.10      | 2                                                   | <i>m</i>     |                   |                   |
| 0.90                                                         | 3              | <i>t</i>                                            | 7.3          |                   |                   |

**<sup>13</sup>C NMR (100.6 MHz, CDCl<sub>3</sub>) δ :** 205.3; 146.0; 132.1; 129.8; 127.3; 122.0; 120.9; 57.1; 48.3; 37.3; 30.5; 19.3; 13.6

**GC-EIMS (m/z, %):** 336 (M<sup>+</sup>, <1); 335 (71); 294 (41); 292 (37); 266 (54); 264 (53); 237 (20); 224 (21); 223 (25); 197 (94); 196 (99); 195 (100); 194 (85); 182 (31); 180 (26); 169 (38); 167 (27); 143 (27); 116 (40); 115 (44); 114 (25); 113 (52); 102 (20); 101 (36); 89 (37); 88 (26).

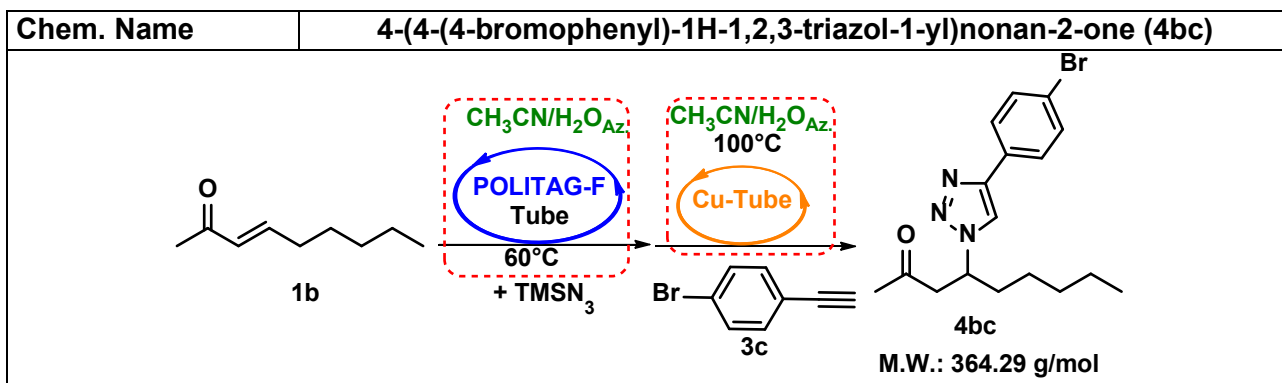

**METHOD:**

The mixture of **1b** (5 mmol) and trimethylsilylazide (0.67 mL, 1.02 eq) in azeotrope CH<sub>3</sub>CN:H<sub>2</sub>O (1 mL, 5 M) was pumped through the PTFE reactor, thermostated at 60 °C, packed with **POLITAG-F** (2.0 g) and quartz powder (0.018 mL/min flow rate measured at the outlet of the first reactor). After a residence time of 3.8 h the resulting azide intermediate formed was mixed, through a T joint, with a 1.2 M solution of 1-bromo-4-ethynylbenzene **3c** (1.2 eq) in CH<sub>3</sub>CN:H<sub>2</sub>O azeotrope continuously pumped at 0.1 mL/min. This mixture was passed in a CTRF heated at 100 °C with a BPR of 10 atm.

The azeotrope was recovered by distillation affording in **4bc** pure product as white solid (1.784 g, 98 % yield, 96% NMR purity).

| <b>Mol Formula</b>                                           |                | C <sub>17</sub> H <sub>22</sub> BrN <sub>3</sub> O |              | <b>m. p.</b>      | 118-122 °C |
|--------------------------------------------------------------|----------------|----------------------------------------------------|--------------|-------------------|------------|
| <b><sup>1</sup>H NMR<br/>(400 MHz,<br/>CDCl<sub>3</sub>)</b> | <b>δ Value</b> | <b>No. H</b>                                       | <b>Mult.</b> | <b>j Value/Hz</b> |            |
|                                                              | 7.80           | 1                                                  | <i>s</i>     |                   |            |
|                                                              | 7.70           | 2                                                  | <i>d</i>     | 8.1               |            |
|                                                              | 7.53           | 2                                                  | <i>d</i>     | 8.2               |            |
|                                                              | 4.95-4.88      | 1                                                  | <i>m</i>     |                   |            |
|                                                              | 3.41           | 1                                                  | <i>dd</i>    | 18.4-8.6          |            |
|                                                              | 2.95           | 1                                                  | <i>dd</i>    | 18.1-4.3          |            |
|                                                              | 2.12           | 3                                                  | <i>s</i>     |                   |            |
|                                                              | 2.08-2.03      | 1                                                  | <i>m</i>     |                   |            |
|                                                              | 1.87-1.81      | 1                                                  | <i>m</i>     |                   |            |
|                                                              | 1.29-1.17      | 5                                                  | <i>m</i>     |                   |            |
|                                                              | 1.15-1.10      | 1                                                  | <i>m</i>     |                   |            |
| 0.85-0.83                                                    | 3              | <i>m</i>                                           |              |                   |            |

**<sup>13</sup>C NMR (100.6 MHz, CD)** δ: 205.3; 146.0; 132.0; 129.8; 127.3; 122.0; 120.8; 57.4; 48.3; 35.2; 31.3; 30.5; 25.7; 22.5; 14.0

**GC-EIMS (m/z, %):** 366 (M+2, 25); 365 (M+1, 58); 364 (M<sup>+</sup>, < 1); 363 (75); 322 (33); 320 (63); 291 (27); 281 (30); 278 (24); 266 (42); 264 (54); 239 (26); 238 (56); 237 (26); 236 (31); 226 (20); 225 (57); 224 (21); 223 (58); 221 (25); 209 (21); 208 (20); 207 (40); 198 (26); 197 (64); 196 (100); 195 (85); 194 (56); 182 (27); 181 (24); 180 (29); 171 (20); 169 (47); 168 (24); 166 (23); 143 (22); 128 (25); 123 (77); 117 (20); 116 (35); 115 (41); 114 (21); 101 (25); 88 (25); 81 (23); 55 (25)

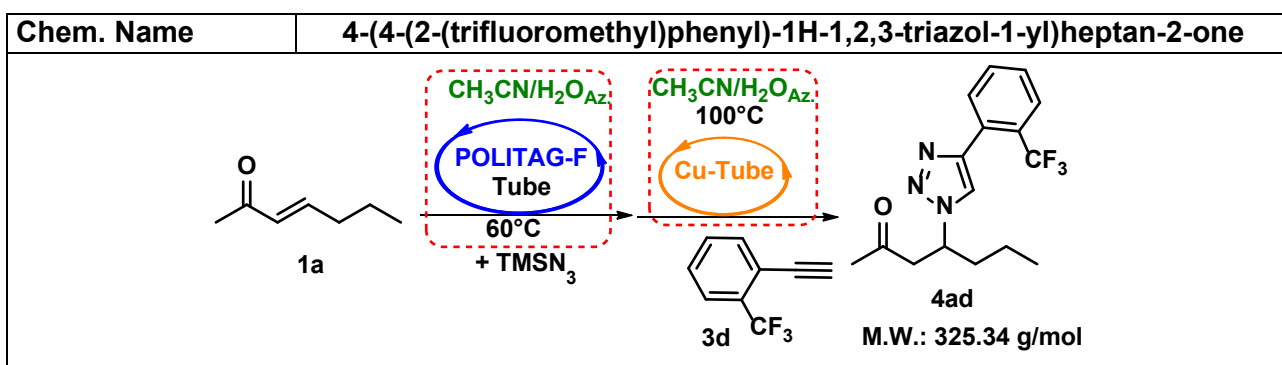

**METHOD:**

The mixture of **1a** (5 mmol) and trimethylsilylazide (0.67 mL, 1.02 eq) in azeotrope CH<sub>3</sub>CN:H<sub>2</sub>O (1 mL, 5 M) was pumped through the PTFE reactor, thermostated at 60 °C, packed with **POLITAG-F** (2.0 g) and quartz powder (0.018 mL/min flow rate measured at the outlet of the first reactor). After a residence time of 3.8 h the resulting azide intermediate formed was mixed, through a T joint, with a 1.2 M solution of 1-ethynyl-2-(trifluoromethyl)benzene **3d** (1.2 eq) in CH<sub>3</sub>CN:H<sub>2</sub>O azeotrope pumped at 0.1 mL/min. This mixture was passed in a CTRF heated at 100 °C with a BPR of 10 atm.

The azeotrope was recovered by distillation affording in **4ad** pure product as oil (1.496 g, 92 % yield).

| Mol Formula                                          |                | C <sub>16</sub> H <sub>18</sub> F <sub>3</sub> N <sub>3</sub> O |              | m. p.             | Oil |
|------------------------------------------------------|----------------|-----------------------------------------------------------------|--------------|-------------------|-----|
| <b><sup>1</sup>H NMR (400 MHz, CDCl<sub>3</sub>)</b> | <b>δ Value</b> | <b>No. H</b>                                                    | <b>Mult.</b> | <b>j Value/Hz</b> |     |
|                                                      | 7.94           | 1                                                               | <i>d</i>     | 7.8               |     |
|                                                      | 7.78           | 1                                                               | <i>s</i>     |                   |     |
|                                                      | 7.74           | 1                                                               | <i>d</i>     | 7.9               |     |
|                                                      | 7.61           | 1                                                               | <i>t</i>     | 7.4               |     |
|                                                      | 7.46           | 1                                                               | <i>t</i>     | 7.9               |     |
|                                                      | 4.99-4.92      | 1                                                               | <i>m</i>     |                   |     |
|                                                      | 3.43           | 1                                                               | <i>dd</i>    | 17.9-8.2          |     |
|                                                      | 2.98           | 1                                                               | <i>dd</i>    | 17.9-4.9          |     |
|                                                      | 2.13           | 3                                                               | <i>s</i>     |                   |     |
|                                                      | 2.08-2.03      | 1                                                               | <i>m</i>     |                   |     |
|                                                      | 1.87-1.78      | 1                                                               | <i>m</i>     |                   |     |
|                                                      | 1.26-1.10      | 2                                                               | <i>m</i>     |                   |     |
| 0.90                                                 | 3              | <i>t</i>                                                        | 7.3          |                   |     |

**<sup>13</sup>C NMR (100.6 MHz, CD)** δ : 205.1; 143.5; 132.0; 131.7; 129.7; 128.2; 127.4 (*q*, J<sub>C-F</sub>= 30.3); 126.1(*q*, J<sub>C-F</sub>= 5.6); 124.2 (*q*, J<sub>C-F</sub>= 273.3), 123.8 (*q*, J<sub>C-F</sub>= 5.6); 57.0; 48.2; 37.2; 30.4; 19.0; 13.4

**<sup>19</sup>F NMR (100.6 MHz, CD)** δ: -58.74

**GC-EIMS (m/z, %):** 325 (M<sup>+</sup>, 50); 282 (40); 255 (27); 254 (62); 240 (27); 194 (27); 185 (69); 184 (94); 172 (20); 169 (45); 166 (40); 165 (100); 164 (72); 151 (54); 134 (31); 113 (62).



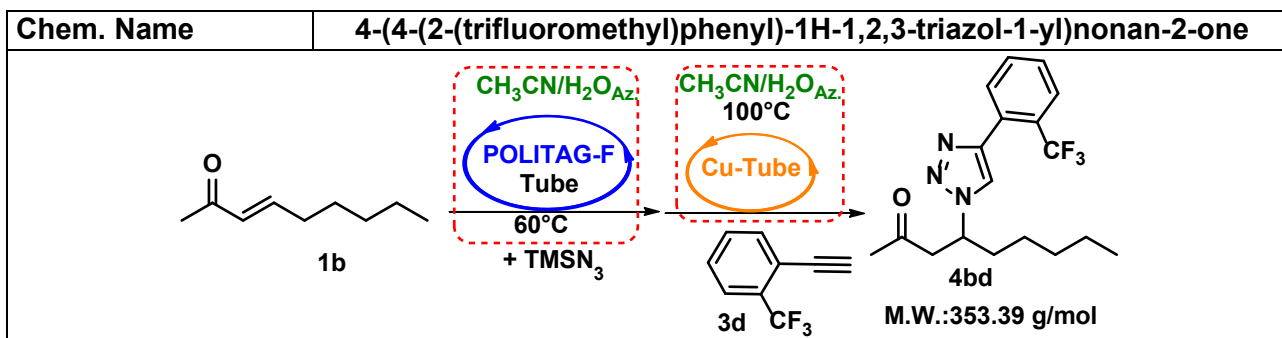

**METHOD:**

The mixture of **1b** (5 mmol) and trimethylsilylazide (0.67 mL, 1.02 eq) in azeotrope CH<sub>3</sub>CN:H<sub>2</sub>O (1 mL, 5 M) was pumped through the PTFE reactor, thermostated at 60 °C, packed with **POLITAG-F** (2.0 g) and quartz powder (0.018 mL/min flow rate measured at the outlet of the first reactor). After a residence time of 3.8 h the resulting azide intermediate formed was mixed, through a T joint, with a 1.2 M solution of 1-ethynyl-2-(trifluoromethyl)benzene **3d** (1.2 eq) in CH<sub>3</sub>CN:H<sub>2</sub>O azeotrope pumped at 0.1 mL/min. This mixture was passed in a CTRF heated at 100 °C with a BPR of 10 atm.

The azeotrope was recovered by distillation affording in **4bd** pure product as oil (1.730 g, 98 % yield).

| <b>Mol Formula</b>                                           |                | C <sub>18</sub> H <sub>22</sub> F <sub>3</sub> N <sub>3</sub> O |              | <b>m. p.</b>      | Oil |
|--------------------------------------------------------------|----------------|-----------------------------------------------------------------|--------------|-------------------|-----|
| <b><sup>1</sup>H NMR<br/>(400 MHz,<br/>CDCl<sub>3</sub>)</b> | <b>δ Value</b> | <b>No. H</b>                                                    | <b>Mult.</b> | <b>j Value/Hz</b> |     |
|                                                              | 7.91           | 1                                                               | <i>d</i>     | 7.8               |     |
|                                                              | 7.77           | 1                                                               | <i>s</i>     |                   |     |
|                                                              | 7.71           | 1                                                               | <i>d</i>     | 7.7               |     |
|                                                              | 7.59           | 1                                                               | <i>t</i>     | 7.5               |     |
|                                                              | 7.44           | 1                                                               | <i>t</i>     | 7.7               |     |
|                                                              | 4.95-4.90      | 1                                                               | <i>m</i>     |                   |     |
|                                                              | 3.40           | 1                                                               | <i>dd</i>    | 18.0-8.4          |     |
|                                                              | 2.96           | 1                                                               | <i>dd</i>    | 18.1-4.7          |     |
|                                                              | 2.10           | 3                                                               | <i>s</i>     |                   |     |
|                                                              | 2.07-2.04      | 1                                                               | <i>m</i>     |                   |     |
|                                                              | 1.88-1.82      | 1                                                               | <i>m</i>     |                   |     |
|                                                              | 1.25-1.20      | 5                                                               | <i>m</i>     |                   |     |
|                                                              | 1.11-1.08      | 1                                                               | <i>m</i>     |                   |     |
| 0.84-0.80                                                    | 3              | <i>m</i>                                                        |              |                   |     |

**<sup>13</sup>C NMR (100.6 MHz, CD)** δ: 205.2; 143.5; 132.0, 131.8, 129.7, 127.7 (*q*, J<sub>C-F</sub>= 30.3), 128.3, 126.3 (*q*, J<sub>C-F</sub>= 272.9), 126.2, 124.0, 57.4, 48.3, 35.3, 31.2, 30.5, 25.5, 22.4, 13.9

**<sup>19</sup>F NMR (100.6 MHz, CD)** δ: -58.73

**GC-EIMS (m/z, %):** 353 (M<sup>+</sup>, < 1); 325 (38); 282 (41); 255 (26); 254 (62); 240 (29); 214 (21); 213 (29); 194 (34); 185 (69); 184 (91); 172 (20); 169 (40); 167 (20); 166 (42); 165 (100); 164 (72); 151 (55); 138 (20); 134 (34); 113 (74); 55 (22).

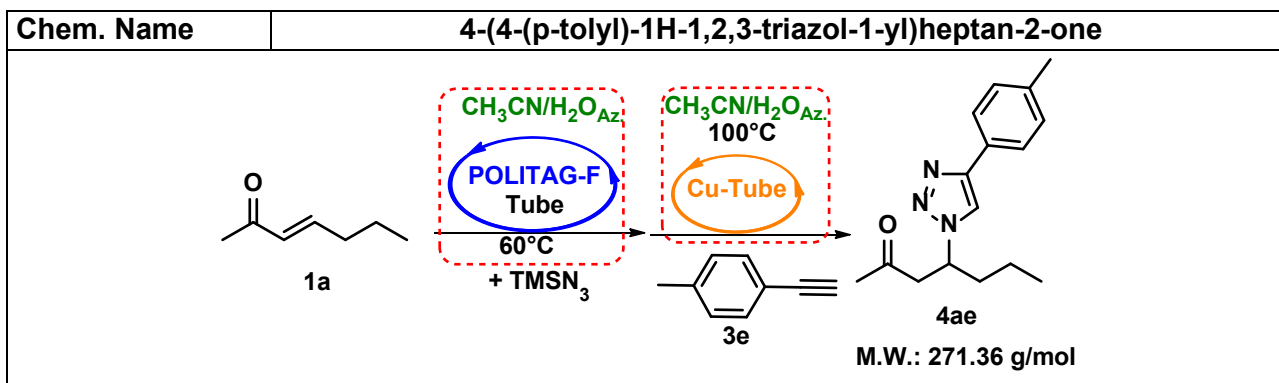

**METHOD:**

The mixture of **1a** (5 mmol) and trimethylsilylazide (0.67 mL, 1.02 eq) in azeotrope CH<sub>3</sub>CN:H<sub>2</sub>O (1 mL, 5 M) was pumped through the PTFE reactor, thermostated at 60 °C, packed with **POLITAG-F** (2.0 g) and quartz powder (0.018 mL/min flow rate measured at the outlet of the first reactor). After a residence time of 3.8 h the resulting azide intermediate formed was mixed, through a T joint, with a 1.2 M solution of 1-ethynyl-4-methylbenzene **3e** (1.2 eq) in CH<sub>3</sub>CN:H<sub>2</sub>O azeotrope pumped at 0.1 mL/min. This mixture was passed in a CTFR heated at 100 °C with a BPR of 10 atm. The azeotrope was recovered by distillation affording in **4ae** pure product as white solid (1.249 g, 92 % yield, 95% NMR purity)

| <b>Mol Formula</b>                                           |                | C <sub>16</sub> H <sub>21</sub> N <sub>3</sub> O |              | <b>m. p.</b>      | 129-131 °C |
|--------------------------------------------------------------|----------------|--------------------------------------------------|--------------|-------------------|------------|
| <b><sup>1</sup>H NMR<br/>(400 MHz,<br/>CDCl<sub>3</sub>)</b> | <b>δ Value</b> | <b>No. H</b>                                     | <b>Mult.</b> | <b>j Value/Hz</b> |            |
|                                                              | 7.75           | 1                                                | <i>s</i>     |                   |            |
|                                                              | 7.71           | 1                                                | <i>d</i>     | 7.4               |            |
|                                                              | 7.22           | 2                                                | <i>d</i>     | 7.5               |            |
|                                                              | 4.95-4.93      | 1                                                | <i>m</i>     |                   |            |
|                                                              | 3.42           | 1                                                | <i>dd</i>    | 18.0-8.5          |            |
|                                                              | 2.94           | 1                                                | <i>dd</i>    | 18.1-4.1          |            |
|                                                              | 2.37           | 3                                                | <i>s</i>     |                   |            |
|                                                              | 2.12           | 3                                                | <i>s</i>     |                   |            |
|                                                              | 2.07-2.01      | 1                                                | <i>m</i>     |                   |            |
|                                                              | 1.84-1.79      | 1                                                | <i>m</i>     |                   |            |
|                                                              | 1.25-1.18      | 2                                                | <i>m</i>     |                   |            |
| 0.90                                                         | 3              | <i>t</i>                                         | 7.2          |                   |            |

**<sup>13</sup>C NMR (100.6 MHz, CDCl<sub>3</sub>) δ:** 205.4; 147.1; 138.0; 129.6; 128.0; 125.7; 120.3; 57.0; 48.4; 37.3; 30.6; 21.4; 19.3; 13.6

**GC-EIMS (m/z, %):** 271 (M<sup>+</sup>, 52); 228 (28); 200 (39); 131 (100); 130 (55); 115 (31); 103 (25).

| Chem. Name                                                                                                                                                                                                                                                                                                                                                                                                                                                                                                                                                                                                                                                                                                                                                                          |                | 4-(4-(p-tolyl)-1H-1,2,3-triazol-1-yl)nonan-2-one |              |                   |          |
|-------------------------------------------------------------------------------------------------------------------------------------------------------------------------------------------------------------------------------------------------------------------------------------------------------------------------------------------------------------------------------------------------------------------------------------------------------------------------------------------------------------------------------------------------------------------------------------------------------------------------------------------------------------------------------------------------------------------------------------------------------------------------------------|----------------|--------------------------------------------------|--------------|-------------------|----------|
|                                                                                                                                                                                                                                                                                                                                                                                                                                                                                                                                                                                                                                                                                                                                                                                     |                |                                                  |              |                   |          |
| <b>METHOD:</b>                                                                                                                                                                                                                                                                                                                                                                                                                                                                                                                                                                                                                                                                                                                                                                      |                |                                                  |              |                   |          |
| <p>The mixture of <b>1b</b> (5 mmol) and trimethylsilylazide (0.67 mL, 1.02 eq) in azeotrope CH<sub>3</sub>CN:H<sub>2</sub>O (1 mL, 5 M) was pumped through the PTFE reactor, thermostated at 60 °C, packed with <b>POLITAG-F</b> (2.0 g) and quartz powder (0.018 mL/min flow rate measured at the outlet of the first reactor). After a residence time of 3.8 h the resulting azide intermediate formed was mixed, through a T joint, with a 1.2 M solution of 1-ethynyl-4-methylbenzene <b>3e</b> (1.2 eq) in CH<sub>3</sub>CN:H<sub>2</sub>O azeotrope pumped at 0.1 mL/min. This mixture was passed in a CTRF heated at 100 °C with a BPR of 10 atm. The azeotrope was recovered by distillation affording in <b>4be</b> pure product as white solid (1.482 g, 99 % yield)</p> |                |                                                  |              |                   |          |
| <b>Mol Formula</b>                                                                                                                                                                                                                                                                                                                                                                                                                                                                                                                                                                                                                                                                                                                                                                  |                | C <sub>18</sub> H <sub>25</sub> N <sub>3</sub> O |              | <b>m. p.</b>      | 90-93 °C |
| <b><sup>1</sup>H NMR (400 MHz, CDCl<sub>3</sub>)</b>                                                                                                                                                                                                                                                                                                                                                                                                                                                                                                                                                                                                                                                                                                                                | <b>δ Value</b> | <b>No. H</b>                                     | <b>Mult.</b> | <b>j Value/Hz</b> |          |
|                                                                                                                                                                                                                                                                                                                                                                                                                                                                                                                                                                                                                                                                                                                                                                                     | 7.75           | 1                                                | <i>s</i>     |                   |          |
|                                                                                                                                                                                                                                                                                                                                                                                                                                                                                                                                                                                                                                                                                                                                                                                     | 7.71           | 2                                                | <i>d</i>     | 8.0               |          |
|                                                                                                                                                                                                                                                                                                                                                                                                                                                                                                                                                                                                                                                                                                                                                                                     | 7.22           | 2                                                | <i>d</i>     | 7.8               |          |
|                                                                                                                                                                                                                                                                                                                                                                                                                                                                                                                                                                                                                                                                                                                                                                                     | 4.95-4.88      | 1                                                | <i>m</i>     |                   |          |
|                                                                                                                                                                                                                                                                                                                                                                                                                                                                                                                                                                                                                                                                                                                                                                                     | 3.42           | 1                                                | <i>dd</i>    | 17.9-8.5          |          |
|                                                                                                                                                                                                                                                                                                                                                                                                                                                                                                                                                                                                                                                                                                                                                                                     | 2.95           | 1                                                | <i>dd</i>    | 17.9-4.6          |          |
|                                                                                                                                                                                                                                                                                                                                                                                                                                                                                                                                                                                                                                                                                                                                                                                     | 2.37           | 3                                                | <i>s</i>     |                   |          |
|                                                                                                                                                                                                                                                                                                                                                                                                                                                                                                                                                                                                                                                                                                                                                                                     | 2.12           | 3                                                | <i>s</i>     |                   |          |
|                                                                                                                                                                                                                                                                                                                                                                                                                                                                                                                                                                                                                                                                                                                                                                                     | 2.08-2.04      | 1                                                | <i>m</i>     |                   |          |
|                                                                                                                                                                                                                                                                                                                                                                                                                                                                                                                                                                                                                                                                                                                                                                                     | 1.89-1.80      | 1                                                | <i>m</i>     |                   |          |
|                                                                                                                                                                                                                                                                                                                                                                                                                                                                                                                                                                                                                                                                                                                                                                                     | 1.26-1.20      | 5                                                | <i>m</i>     |                   |          |
| 1.16-1.11                                                                                                                                                                                                                                                                                                                                                                                                                                                                                                                                                                                                                                                                                                                                                                           | 1              | <i>m</i>                                         |              |                   |          |
| 0.86-0.84                                                                                                                                                                                                                                                                                                                                                                                                                                                                                                                                                                                                                                                                                                                                                                           | 3              | <i>m</i>                                         |              |                   |          |
| <b><sup>13</sup>C NMR (100.6 MHz, CDCl<sub>3</sub>) δ:</b> 205.4; 147.1; 138.0; 129.6; 128.0; 125.7; 120.3; 57.3; 48.4; 35.3; 31.3; 30.6; 25.7; 22.5; 21.4; 14.1.                                                                                                                                                                                                                                                                                                                                                                                                                                                                                                                                                                                                                   |                |                                                  |              |                   |          |
| <b>GC-EIMS (m/z, %):</b> 299 (M <sup>+</sup> , 47); 256 (36); 200 (32); 131 (100); 130 (48); 115 (28).                                                                                                                                                                                                                                                                                                                                                                                                                                                                                                                                                                                                                                                                              |                |                                                  |              |                   |          |

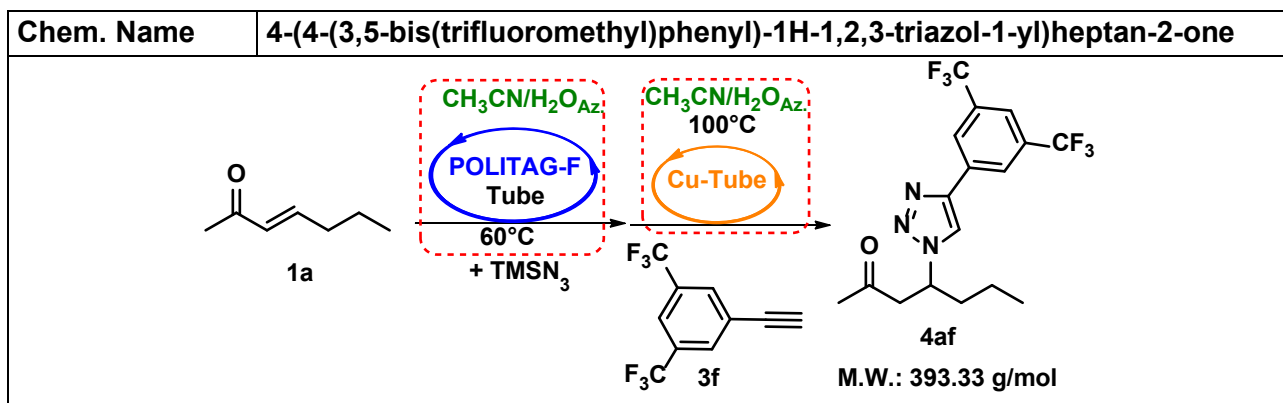

**METHOD:**

The mixture of **1a** (5 mmol) and trimethylsilylazide (0.67 mL, 1.02 eq) in azeotrope CH<sub>3</sub>CN:H<sub>2</sub>O (1 mL, 5 M) was pumped through the PTFE reactor, thermostated at 60 °C, packed with **POLITAG-F** (2.0 g) and quartz powder (0.018 mL/min flow rate measured at the outlet of the first reactor). After a residence time of 3.8 h the resulting azide intermediate formed was mixed, through a T joint, with a 1.2 M solution of 1-ethynyl-3,5-bis(trifluoromethyl)benzene **3f** (1.2 eq) in CH<sub>3</sub>CN:H<sub>2</sub>O azeotrope pumped at 0.1 mL/min. This mixture was passed in a CTRF heated at 100 °C with a BPR of 10 atm.

The azeotrope was recovered by distillation affording in **4af** pure product as white solid (1.908 g, 97 % yield)

| <b>Mol Formula</b>                                   |                | <b>C<sub>17</sub>H<sub>17</sub>F<sub>6</sub>N<sub>3</sub>O</b> |              | <b>m. p.</b>      | <b>80-82 °C</b> |
|------------------------------------------------------|----------------|----------------------------------------------------------------|--------------|-------------------|-----------------|
| <b><sup>1</sup>H NMR (400 MHz, CDCl<sub>3</sub>)</b> | <b>δ Value</b> | <b>No. H</b>                                                   | <b>Mult.</b> | <b>j Value/Hz</b> |                 |
|                                                      | 8.27           | 2                                                              | <i>s</i>     |                   |                 |
|                                                      | 7.98           | 1                                                              | <i>s</i>     |                   |                 |
|                                                      | 7.80           | 1                                                              | <i>s</i>     |                   |                 |
|                                                      | 5.00-4.95      | 1                                                              | <i>m</i>     |                   |                 |
|                                                      | 3.46           | 1                                                              | <i>dd</i>    | 18.4-9.1          |                 |
|                                                      | 2.97           | 1                                                              | <i>dd</i>    | 18.3-4.2          |                 |
|                                                      | 2.13           | 3                                                              | <i>s</i>     |                   |                 |
|                                                      | 2.12-2.06      | 1                                                              | <i>m</i>     |                   |                 |
|                                                      | 1.89-1.80      | 1                                                              | <i>m</i>     |                   |                 |
|                                                      | 1.30-1.18      | 2                                                              | <i>m</i>     |                   |                 |
| 0.91                                                 | 3              | <i>t</i>                                                       | 7.5          |                   |                 |

**<sup>13</sup>C NMR (100.6 MHz, CDCl<sub>3</sub>) δ:** 205.2; 144.3; 133.0; 132.3 (*q*, J<sub>C-F</sub>= 33.4), 125.7, 123.4 (*q*, J<sub>C-F</sub>= 272.9), 122.0; 121.5 (*q*, J<sub>C-F</sub>= 3.8); 57.4; 48.2; 37.1; 30.4; 19.3; 13.5.

**<sup>19</sup>F NMR (100.6 MHz, CD) δ:** -63.04

**GC-EIMS (m/z, %):** 394 (M+1, 21); 393 (M<sup>+</sup>, 83); 374 (87); 350 (76); 323 (22); 322 (88); 308 (40); 295 (24); 294 (31); 282 (30); 253 (51); 252 (100); 233 (20); 169 (21); 113 (22).

**Chem. Name** 4-(4-(3,5-bis(trifluoromethyl)phenyl)-1H-1,2,3-triazol-1-yl)nonan-2-one

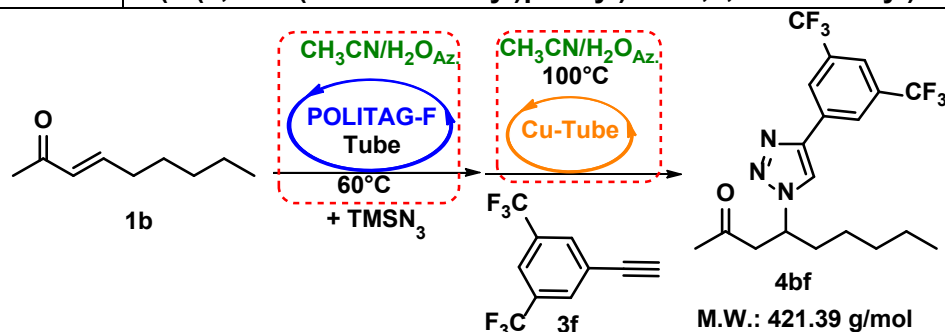

**METHOD:**

The mixture of **1b** (5 mmol) and trimethylsilylazide (0.67 mL, 1.02 eq) in azeotrope CH<sub>3</sub>CN:H<sub>2</sub>O (1 mL, 5 M) was pumped through the PTFE reactor, thermostated at 60 °C, packed with **POLITAG-F** (2.0 g) and quartz powder (0.018 mL/min flow rate measured at the outlet of the first reactor). After a residence time of 3.8 h the resulting azide intermediate formed was mixed, through a T joint, with a 1.2 M solution of 1-ethynyl-3,5-bis(trifluoromethyl)benzene **3f** (1.2 eq) in CH<sub>3</sub>CN:H<sub>2</sub>O azeotrope pumped at 0.1 mL/min. This mixture was passed in a CTFR heated at 100 °C with a BPR of 10 atm. The azeotrope was recovered by distillation affording in **4bf** pure product as white solid (2.021 g, 96 % yield).

| Mol Formula                                          |                | C <sub>19</sub> H <sub>21</sub> F <sub>6</sub> N <sub>3</sub> O |              | m. p.             | 95-97 °C |
|------------------------------------------------------|----------------|-----------------------------------------------------------------|--------------|-------------------|----------|
| <b><sup>1</sup>H NMR (400 MHz, CDCl<sub>3</sub>)</b> | <b>δ Value</b> | <b>No. H</b>                                                    | <b>Mult.</b> | <b>j Value/Hz</b> |          |
|                                                      | 8.28           | 2                                                               | s            |                   |          |
|                                                      | 7.98           | 1                                                               | s            |                   |          |
|                                                      | 7.81           | 1                                                               | s            |                   |          |
|                                                      | 5.01-4.90      | 1                                                               | m            |                   |          |
|                                                      | 3.45           | 1                                                               | dd           | 18.6-8.8          |          |
|                                                      | 2.97           | 1                                                               | dd           | 18.2-4.1          |          |
|                                                      | 2.18-2.03      | 4                                                               | m            |                   |          |
|                                                      | 1.94-1.82      | 1                                                               | m            |                   |          |
|                                                      | 1.38-1.19      | 5                                                               | m            |                   |          |
|                                                      | 1.18-1.03      | 1                                                               | m            |                   |          |
| 0.89-0.79                                            | 3              | m                                                               |              |                   |          |

**<sup>13</sup>C NMR (100.6 MHz, CDCl<sub>3</sub>) δ:** 205.2; 144.3; 133.0, 132.3 (q, J<sub>C-F</sub>= 33.5), 125.7, 123.4 (q, J<sub>C-F</sub>= 272.9) 122.0, 121.5 (q, J<sub>C-F</sub>= 3.8), 57.7, 48.3, 35.1, 31.3, 30.4, 25.7, 22.5, 14.0.

**<sup>19</sup>F NMR (100.6 MHz, CD) δ:** -63.00

**GC-EIMS (m/z, %):** 422 (M+1, 24); 421 (M<sup>+</sup>, 13); 402 (59); 401 (47); 392 (50); 378 (71); 365 (30); 364 (52); 349 (56); 336 (37); 333 (23); 324 (22); 322 (66); 321 (33); 308 (54); 307 (43); 306 (41); 294 (44); 293 (21); 292 (31); 282 (56); 281 (37); 280 (79); 279 (38); 264 (20); 254 (32); 253 (54); 252 (89); 240 (45); 238 (24); 234 (32); 233 (32); 225 (29); 202 (24); 170 (26); 169 (40); 168 (100); 123 (31).

| Chem. Name                                                                                                                                                                                                                                                                                                                                                                                                                                                                                                                                                                                                                                                                                                                                                                   | 4-(4-(thiophen-3-yl)-1H-1,2,3-triazol-1-yl)heptan-2-one |                                                   |              |                   |          |
|------------------------------------------------------------------------------------------------------------------------------------------------------------------------------------------------------------------------------------------------------------------------------------------------------------------------------------------------------------------------------------------------------------------------------------------------------------------------------------------------------------------------------------------------------------------------------------------------------------------------------------------------------------------------------------------------------------------------------------------------------------------------------|---------------------------------------------------------|---------------------------------------------------|--------------|-------------------|----------|
|                                                                                                                                                                                                                                                                                                                                                                                                                                                                                                                                                                                                                                                                                                                                                                              |                                                         |                                                   |              |                   |          |
| <b>METHOD:</b>                                                                                                                                                                                                                                                                                                                                                                                                                                                                                                                                                                                                                                                                                                                                                               |                                                         |                                                   |              |                   |          |
| <p>The mixture of <b>1a</b> (5 mmol) and trimethylsilylazide (0.67 mL, 1.02 eq) in azeotrope CH<sub>3</sub>CN:H<sub>2</sub>O (1 mL, 5 M) was pumped through the PTFE reactor, thermostated at 60 °C, packed with <b>POLITAG-F</b> (2.0 g) and quartz powder (0.018 mL/min flow rate measured at the outlet of the first reactor). After a residence time of 3.8 h the resulting azide intermediate formed was mixed, through a T joint, with a 1.2 M solution of 3-ethynylthiophene <b>3g</b> (1.2 eq) in CH<sub>3</sub>CN:H<sub>2</sub>O azeotrope pumped at 0.1 mL/min. This mixture was passed in a CTFR heated at 100 °C with a BPR of 10 atm. The azeotrope was recovered by distillation affording in <b>4ag</b> pure product as white solid (1.212 g, 92 % yield)</p> |                                                         |                                                   |              |                   |          |
| <b>Mol Formula</b>                                                                                                                                                                                                                                                                                                                                                                                                                                                                                                                                                                                                                                                                                                                                                           |                                                         | C <sub>13</sub> H <sub>17</sub> N <sub>3</sub> OS |              | <b>m. p.</b>      | 87-89 °C |
| <b><sup>1</sup>H NMR</b><br>(400 MHz,<br>CDCl <sub>3</sub> )                                                                                                                                                                                                                                                                                                                                                                                                                                                                                                                                                                                                                                                                                                                 | <b>δ Value</b>                                          | <b>No. H</b>                                      | <b>Mult.</b> | <b>j Value/Hz</b> |          |
|                                                                                                                                                                                                                                                                                                                                                                                                                                                                                                                                                                                                                                                                                                                                                                              | 7.69                                                    | 1                                                 | <i>s</i>     |                   |          |
|                                                                                                                                                                                                                                                                                                                                                                                                                                                                                                                                                                                                                                                                                                                                                                              | 7.67-7.65                                               | 1                                                 | <i>m</i>     |                   |          |
|                                                                                                                                                                                                                                                                                                                                                                                                                                                                                                                                                                                                                                                                                                                                                                              | 7.45                                                    | 1                                                 | <i>d</i>     | 4.8               |          |
|                                                                                                                                                                                                                                                                                                                                                                                                                                                                                                                                                                                                                                                                                                                                                                              | 7.38                                                    | 1                                                 | <i>d</i>     | 4.9               |          |
|                                                                                                                                                                                                                                                                                                                                                                                                                                                                                                                                                                                                                                                                                                                                                                              | 4.96-4.89                                               | 1                                                 | <i>m</i>     |                   |          |
|                                                                                                                                                                                                                                                                                                                                                                                                                                                                                                                                                                                                                                                                                                                                                                              | 3.42                                                    | 1                                                 | <i>dd</i>    | 17.9-8.6          |          |
|                                                                                                                                                                                                                                                                                                                                                                                                                                                                                                                                                                                                                                                                                                                                                                              | 2.94                                                    | 1                                                 | <i>dd</i>    | 18.0-4.6          |          |
|                                                                                                                                                                                                                                                                                                                                                                                                                                                                                                                                                                                                                                                                                                                                                                              | 2.12                                                    | 3                                                 | <i>s</i>     |                   |          |
|                                                                                                                                                                                                                                                                                                                                                                                                                                                                                                                                                                                                                                                                                                                                                                              | 2.09-2.02                                               | 1                                                 | <i>m</i>     |                   |          |
|                                                                                                                                                                                                                                                                                                                                                                                                                                                                                                                                                                                                                                                                                                                                                                              | 1.87-1.76                                               | 1                                                 | <i>m</i>     |                   |          |
|                                                                                                                                                                                                                                                                                                                                                                                                                                                                                                                                                                                                                                                                                                                                                                              | 1.30-1.10                                               | 2                                                 | <i>m</i>     |                   |          |
| 0.90                                                                                                                                                                                                                                                                                                                                                                                                                                                                                                                                                                                                                                                                                                                                                                         | 3                                                       | <i>t</i>                                          | 7.1          |                   |          |
| <b><sup>13</sup>C NMR (100.6 MHz, CD)</b> δ: 205.4; 143.3; 132.0; 126.4; 125.9; 121.1; 120.5; 57.0; 48.4; 37.3; 30.6; 19.3; 13.6.                                                                                                                                                                                                                                                                                                                                                                                                                                                                                                                                                                                                                                            |                                                         |                                                   |              |                   |          |
| <b>GC-EIMS (m/z, %):</b> 263 (M <sup>+</sup> , 96); 220 (51); 192 (60); 150 (20); 149 (20); 124 (21); 123 (100); 122 (79); 113 (21); 108 (21); 97 (21); 95 (22).                                                                                                                                                                                                                                                                                                                                                                                                                                                                                                                                                                                                             |                                                         |                                                   |              |                   |          |

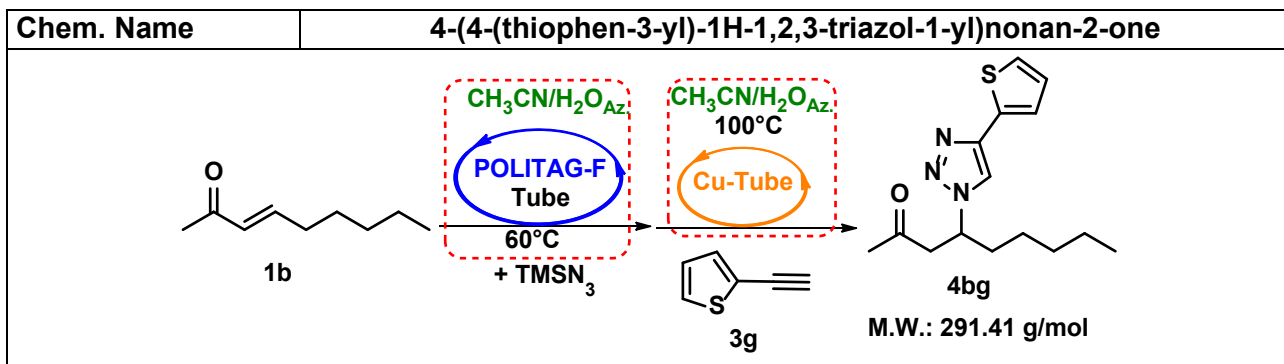

**METHOD:**

The mixture of **1b** (5 mmol) and trimethylsilylazide (0.67 mL, 1.02 eq) in azeotrope CH<sub>3</sub>CN:H<sub>2</sub>O (1 mL, 5 M) was pumped through the PTFE reactor, thermostated at 60 °C, packed with **POLITAG-F** (2.0 g) and quartz powder (0.018 mL/min flow rate measured at the outlet of the first reactor). After a residence time of 3.8 h the resulting azide intermediate formed was mixed, through a T joint, with a 1.2 M solution of 3-ethynylthiophene **3g** (1.2 eq) in CH<sub>3</sub>CN:H<sub>2</sub>O azeotrope pumped at 0.1 mL/min. This mixture was passed in a CTFR heated at 100 °C with a BPR of 10 atm.

The azeotrope was recovered by distillation affording in **4bg** pure product as white solid (1.411 g, 97 % yield, 95% NMR purity).

| <b>Mol Formula</b>                                           |                | <b>C<sub>15</sub>H<sub>21</sub>N<sub>3</sub>OS</b> |              | <b>m. p.</b>      | 60-62 °C |
|--------------------------------------------------------------|----------------|----------------------------------------------------|--------------|-------------------|----------|
| <b><sup>1</sup>H NMR<br/>(400 MHz,<br/>CDCl<sub>3</sub>)</b> | <b>δ Value</b> | <b>No. H</b>                                       | <b>Mult.</b> | <b>j Value/Hz</b> |          |
|                                                              | 7.70           | 1                                                  | <i>s</i>     |                   |          |
|                                                              | 7.64           | 1                                                  | <i>s</i>     |                   |          |
|                                                              | 7.43           | 1                                                  | <i>d</i>     | 4.8               |          |
|                                                              | 7.34           | 1                                                  | <i>d</i>     | 4.8               |          |
|                                                              | 4.91-4.86      | 1                                                  | <i>m</i>     |                   |          |
|                                                              | 3.36           | 1                                                  | <i>dd</i>    | 17.9-8.5          |          |
|                                                              | 2.91           | 1                                                  | <i>dd</i>    | 17.9-4.6          |          |
|                                                              | 2.08           | 3                                                  | <i>s</i>     |                   |          |
|                                                              | 2.03-1.99      | 1                                                  | <i>m</i>     |                   |          |
|                                                              | 1.83-1.77      | 1                                                  | <i>m</i>     |                   |          |
|                                                              | 1.23-1.12      | 5                                                  | <i>m</i>     |                   |          |
|                                                              | 1.09-1.07      | 1                                                  | <i>m</i>     |                   |          |
| 0.81-0.79                                                    | 3              | <i>m</i>                                           |              |                   |          |

**<sup>13</sup>C NMR (100.6 MHz, CDCl<sub>3</sub>) δ:** 205.4, 143.2, 132.0, 126.3, 125.9, 121.0, 120.5, 57.2, 48.4, 35.2, 31.3, 30.5, 25.6, 22.5, 14.0.

**GC-EIMS (m/z, %):** 291 (M<sup>+</sup>, 52); 248 (46); 192 (65); 165 (26); 164 (23); 152 (25); 151 (85); 150 (21); 149 (20); 125 (31); 124 (24); 123 (100); 122 (66); 109 (23); 108 (20); 97 (44); 96 (28); 95 (32); 81 (23); 69 (22); 55 (31).

| Chem. Name                                                                                                                                                                                                                                                                                                                                                                                                                                                                                                                                                                                                                                                                                                                                                                         |                | 4-(4-butyl-1H-1,2,3-triazol-1-yl)heptan-2-one    |              |                   |     |
|------------------------------------------------------------------------------------------------------------------------------------------------------------------------------------------------------------------------------------------------------------------------------------------------------------------------------------------------------------------------------------------------------------------------------------------------------------------------------------------------------------------------------------------------------------------------------------------------------------------------------------------------------------------------------------------------------------------------------------------------------------------------------------|----------------|--------------------------------------------------|--------------|-------------------|-----|
|                                                                                                                                                                                                                                                                                                                                                                                                                                                                                                                                                                                                                                                                                                                                                                                    |                |                                                  |              |                   |     |
| <b>METHOD:</b>                                                                                                                                                                                                                                                                                                                                                                                                                                                                                                                                                                                                                                                                                                                                                                     |                |                                                  |              |                   |     |
| <p>The mixture of <b>1a</b> (5 mmol) and trimethylsilylazide (0.67 mL, 1.02 eq) in azeotrope CH<sub>3</sub>CN:H<sub>2</sub>O (1 mL, 5 M) was pumped through the PTFE reactor, thermostated at 60 °C, packed with <b>POLITAG-F</b> (2.0 g) and quartz powder (0.018 mL/min flow rate measured at the outlet of the first reactor). After a residence time of 3.8 h the resulting azide intermediate formed was mixed, through a T joint, with a 1.2 M solution of hex-1-yne <b>3h</b> (1.2 eq) in CH<sub>3</sub>CN:H<sub>2</sub>O azeotrope pumped at 0.1 mL/min. This mixture was passed in a CTRF heated at 100 °C with a BPR of 10 atm.</p> <p>The azeotrope was recovered by distillation affording in <b>4ah</b> pure product as oil (1.101 g, 93 % yield, 95% NMR purity)</p> |                |                                                  |              |                   |     |
| <b>Mol Formula</b>                                                                                                                                                                                                                                                                                                                                                                                                                                                                                                                                                                                                                                                                                                                                                                 |                | C <sub>13</sub> H <sub>23</sub> N <sub>3</sub> O |              | <b>m. p.</b>      | Oil |
| <b><sup>1</sup>H NMR (400 MHz, CDCl<sub>3</sub>)</b>                                                                                                                                                                                                                                                                                                                                                                                                                                                                                                                                                                                                                                                                                                                               | <b>δ Value</b> | <b>No. H</b>                                     | <b>Mult.</b> | <b>j Value/Hz</b> |     |
|                                                                                                                                                                                                                                                                                                                                                                                                                                                                                                                                                                                                                                                                                                                                                                                    | 7.26           | 1                                                | <i>s</i>     |                   |     |
|                                                                                                                                                                                                                                                                                                                                                                                                                                                                                                                                                                                                                                                                                                                                                                                    | 4.86-4.79      | 1                                                | <i>m</i>     |                   |     |
|                                                                                                                                                                                                                                                                                                                                                                                                                                                                                                                                                                                                                                                                                                                                                                                    | 3.33           | 1                                                | <i>dd</i>    | 17.8-8.3          |     |
|                                                                                                                                                                                                                                                                                                                                                                                                                                                                                                                                                                                                                                                                                                                                                                                    | 2.88           | 1                                                | <i>dd</i>    | 17.7-4.9          |     |
|                                                                                                                                                                                                                                                                                                                                                                                                                                                                                                                                                                                                                                                                                                                                                                                    | 2.66           | 2                                                | <i>t</i>     | 7.7               |     |
|                                                                                                                                                                                                                                                                                                                                                                                                                                                                                                                                                                                                                                                                                                                                                                                    | 2.08           | 3                                                | <i>s</i>     |                   |     |
|                                                                                                                                                                                                                                                                                                                                                                                                                                                                                                                                                                                                                                                                                                                                                                                    | 2.00-0.91      | 1                                                | <i>m</i>     |                   |     |
|                                                                                                                                                                                                                                                                                                                                                                                                                                                                                                                                                                                                                                                                                                                                                                                    | 1.79-1.70      | 1                                                | <i>m</i>     |                   |     |
|                                                                                                                                                                                                                                                                                                                                                                                                                                                                                                                                                                                                                                                                                                                                                                                    | 1.61           | 2                                                | <i>t</i>     | 7.7               |     |
|                                                                                                                                                                                                                                                                                                                                                                                                                                                                                                                                                                                                                                                                                                                                                                                    | 1.37-1.31      | 2                                                | <i>m</i>     |                   |     |
|                                                                                                                                                                                                                                                                                                                                                                                                                                                                                                                                                                                                                                                                                                                                                                                    | 1.19-1.05      | 2                                                | <i>m</i>     |                   |     |
| 0.92-0.84                                                                                                                                                                                                                                                                                                                                                                                                                                                                                                                                                                                                                                                                                                                                                                          | 6              | <i>m</i>                                         |              |                   |     |
| <b><sup>13</sup>C NMR (100.6 MHz, CDCl<sub>3</sub>) δ</b> : 205.4; 147.7; 121.5; 56.7; 48.4; 37.4; 31.6; 30.5; 25.4, 22.4, 19.2, 13.9, 13.6.                                                                                                                                                                                                                                                                                                                                                                                                                                                                                                                                                                                                                                       |                |                                                  |              |                   |     |
| <b>GC-EIMS (m/z, %):</b> 238 (M <sup>+</sup> , 46); 224 (24); 210 (39); 180 (29); 168 (28); 154 (23); 141 (36); 140 (28); 126 (28); 124 (23); 123 (61); 115 (23); 113 (28); 98 (100); 97 (27); 83 (53); 81 (25); 75 (27); 73 (72); 59 (25); 55 (32).                                                                                                                                                                                                                                                                                                                                                                                                                                                                                                                               |                |                                                  |              |                   |     |



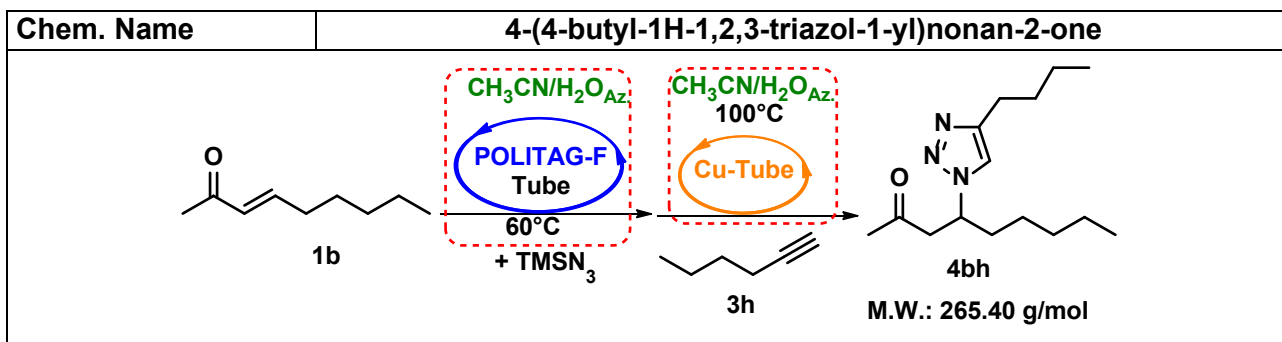

**METHOD:**

The mixture of **1b** (5 mmol) and trimethylsilylazide (0.67 mL, 1.02 eq) in azeotrope CH<sub>3</sub>CN:H<sub>2</sub>O (1 mL, 5 M) was pumped through the PTFE reactor, thermostated at 60 °C, packed with **POLITAG-F** (2.0 g) and quartz powder (0.018 mL/min flow rate measured at the outlet of the first reactor). After a residence time of 3.8 h the resulting azide intermediate formed was mixed, through a T joint, with a 1.2 M solution of hex-1-yne **3h** (1.2 eq) in CH<sub>3</sub>CN:H<sub>2</sub>O azeotrope pumped at 0.1 mL/min. This mixture was passed in a CTRF heated at 100 °C with a BPR of 10 atm.

The azeotrope was recovered by distillation affording in **4bh** pure product as oil (1.235 g, 93 % yield).

| Mol Formula                                            |           | C <sub>15</sub> H <sub>27</sub> N <sub>3</sub> O |           | m. p.      | Oil |
|--------------------------------------------------------|-----------|--------------------------------------------------|-----------|------------|-----|
| <sup>1</sup> H NMR<br>(400 MHz,<br>CDCl <sub>3</sub> ) | δ Value   | No. H                                            | Mult.     | j Value/Hz |     |
|                                                        | 7.26      | 1                                                | <i>s</i>  |            |     |
|                                                        | 4.85-4.78 | 1                                                | <i>m</i>  |            |     |
|                                                        | 3.31      | 1                                                | <i>dd</i> | 17.7-8.2   |     |
|                                                        | 2.87      | 1                                                | <i>dd</i> | 17.7-4.7   |     |
|                                                        | 2.62      | 2                                                | <i>t</i>  | 7.7        |     |
|                                                        | 2.06      | 3                                                | <i>s</i>  |            |     |
|                                                        | 2.05-1.90 | 1                                                | <i>m</i>  |            |     |
|                                                        | 1.77-1.69 | 1                                                | <i>m</i>  |            |     |
|                                                        | 1.62-1.57 | 2                                                | <i>m</i>  |            |     |
|                                                        | 1.34-1.20 | 6                                                | <i>m</i>  |            |     |
|                                                        | 1.12-1.02 | 2                                                | <i>m</i>  |            |     |
| 0.86-0.81                                              | 6         | <i>m</i>                                         |           |            |     |

<sup>13</sup>C NMR (100.6 MHz, CD) δ: 205.4; 147.7; 121.4; 56.6; 48.3; 37.3; 31.6; 30.4; 29.4; 28.9; 25.7; 22.6; 19.2; 14.1; 13.5.

GC-EIMS (m/z, %): 265 (M<sup>+</sup>, 59); 222 (27); 208 (25); 194 (100); 180 (53); 167 (51); 166 (39); 152 (91); 136 (26); 124 (44); 113 (32); 110 (30); 97 (29); 96 (39); 95 (29); 94 (24); 83 (25); 82 (54); 80 (32); 67 (24); 55 (45); 54 (26).

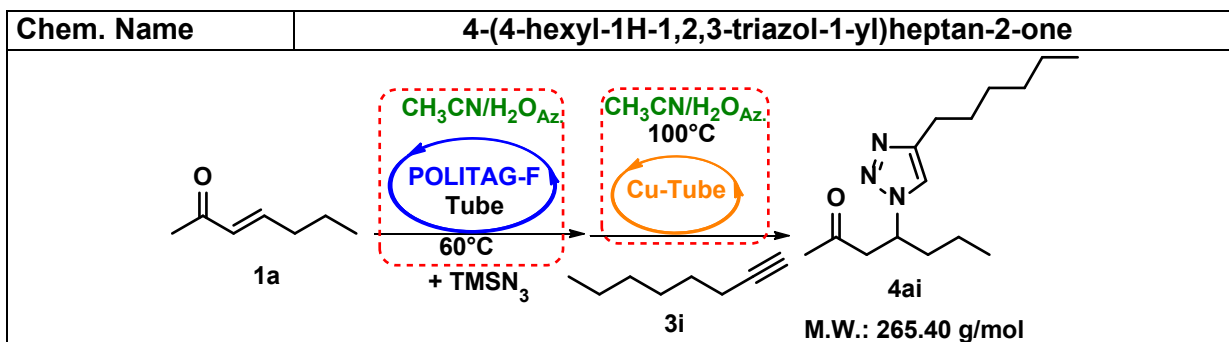

**METHOD:**

The mixture of **1a** (5 mmol) and trimethylsilylazide (0.67 mL, 1.02 eq) in azeotrope CH<sub>3</sub>CN:H<sub>2</sub>O (1 mL, 5 M) was pumped through the PTFE reactor, thermostated at 60 °C, packed with **POLITAG-F** (2.0 g) and quartz powder (0.018 mL/min flow rate measured at the outlet of the first reactor). After a residence time of 3.8 h the resulting azide intermediate formed was mixed, through a T joint, with a 1.2 M solution of oct-1-yne **3i** (1.2 eq) in CH<sub>3</sub>CN:H<sub>2</sub>O azeotrope pumped at 0.1 mL/min. This mixture was passed in a CTFR heated at 100 °C with a BPR of 10 atm. The azeotrope was recovered by distillation affording in **4ai** pure product as oil (1.166 g, 88 % yield, 97% NMR purity).

| Mol Formula                                            |           | C <sub>15</sub> H <sub>27</sub> N <sub>3</sub> O |           | m. p.      | Oil |
|--------------------------------------------------------|-----------|--------------------------------------------------|-----------|------------|-----|
| <sup>1</sup> H NMR<br>(400 MHz,<br>CDCl <sub>3</sub> ) | δ Value   | No. H                                            | Mult.     | j Value/Hz |     |
|                                                        | 7.26      | 1                                                | <i>s</i>  |            |     |
|                                                        | 4.86-4.79 | 1                                                | <i>m</i>  |            |     |
|                                                        | 3.32      | 1                                                | <i>dd</i> | 17.9-8.3   |     |
|                                                        | 2.88      | 1                                                | <i>dd</i> | 18.1-4.7   |     |
|                                                        | 2.66-2.63 | 2                                                | <i>m</i>  |            |     |
|                                                        | 2.07      | 3                                                | <i>s</i>  |            |     |
|                                                        | 1.99-1.91 | 1                                                | <i>m</i>  |            |     |
|                                                        | 1.78-1.70 | 1                                                | <i>m</i>  |            |     |
|                                                        | 1.65-1.58 | 2                                                | <i>m</i>  |            |     |
|                                                        | 1.30-1.21 | 6                                                | <i>m</i>  |            |     |
|                                                        | 1.18-1.07 | 2                                                | <i>m</i>  |            |     |
| 0.87-0.83                                              | 6         | <i>m</i>                                         |           |            |     |

<sup>13</sup>C NMR (100.6 MHz, CDCl<sub>3</sub>) δ: 205.4, 128.8, 121.5, 56.6, 48.4, 37.4, 31.6, 30.5, 29.4, 29.0, 25.7, 22.6, 19.2, 14.1, 13.5.

GC-EIMS (m/z, %): 265 (M<sup>+</sup>, 58); 222 (25); 208 (25); 195 (81); 180 (55); 166 (39), 152 (94); 136 (29); 124 (43); 113 (30); 110 (27); 97 (26); 96 (37); 95 (26); 94 (22); 83 (21); 82 (50); 80 (31); 67 (21); 55 (39); 54 (22).

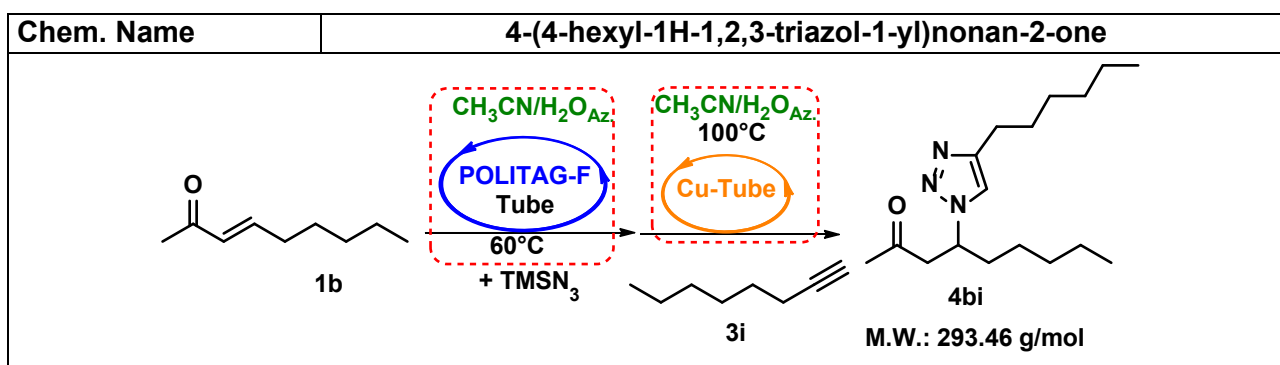

**METHOD:**

The mixture of **1b** (5 mmol) and trimethylsilylazide (0.67 mL, 1.02 eq) in azeotrope CH<sub>3</sub>CN:H<sub>2</sub>O (1 mL, 5 M) was pumped through the PTFE reactor, thermostated at 60 °C, packed with **POLITAG-F** (2.0 g) and quartz powder (0.018 mL/min flow rate measured at the outlet of the first reactor). After a residence time of 3.8 h the resulting azide intermediate formed was mixed, through a T joint, with a 1.2 M solution of oct-1-yne **3i** (1.2 eq) in CH<sub>3</sub>CN:H<sub>2</sub>O azeotrope pumped at 0.1 mL/min. This mixture was passed in a CTRF heated at 100 °C with a BPR of 10 atm.

The azeotrope was recovered by distillation affording in **4bi** pure product as oil (1.290 g, 88 % yield, 95% NMR purity).

| Mol Formula                                                  |                | C <sub>17</sub> H <sub>31</sub> N <sub>3</sub> O |              | m. p.             | Oil |
|--------------------------------------------------------------|----------------|--------------------------------------------------|--------------|-------------------|-----|
| <b><sup>1</sup>H NMR</b><br>(400 MHz,<br>CDCl <sub>3</sub> ) | <b>δ Value</b> | <b>No. H</b>                                     | <b>Mult.</b> | <b>j Value/Hz</b> |     |
|                                                              | 7.29           | 1                                                | <i>s</i>     |                   |     |
|                                                              | 4.86-4.82      | 1                                                | <i>m</i>     |                   |     |
|                                                              | 3.36           | 1                                                | <i>dd</i>    | 18.1-8.4          |     |
|                                                              | 2.92           | 1                                                | <i>dd</i>    | 18.1-4.6          |     |
|                                                              | 2.70-2.67      | 3                                                | <i>m</i>     |                   |     |
|                                                              | 2.11           | 3                                                | <i>s</i>     |                   |     |
|                                                              | 2.03-1.97      | 1                                                | <i>m</i>     |                   |     |
|                                                              | 1.84-1.80      | 1                                                | <i>m</i>     |                   |     |
|                                                              | 1.67-1.63      | 2                                                | <i>m</i>     |                   |     |
|                                                              | 1.39-1.30      | 7                                                | <i>m</i>     |                   |     |
|                                                              | 1.27-1.23      | 5                                                | <i>m</i>     |                   |     |
| 0.88-0.84                                                    | 6              | <i>m</i>                                         |              |                   |     |

**<sup>13</sup>C NMR (100.6 MHz, CD)** δ: 205.5, 147.7, 121.5, 56.9, 48.4, 35.3, 31.6, 31.2, 30.5, 29.4, 29.0, 25.7, 25.6, 22.6, 22.5, 14.1, 14.0

**GC-EIMS (m/z, %):** 293 (M<sup>+</sup>, 57); 250 (37); 236 (59); 223 (67); 222 (100); 208 (52); 194 (55); 168 (20); 166 (25); 152 (76); 124 (29); 123 (50); 110 (20); 97 (28); 96 (27); 83 (47); 82 (46); 81 (35); 80 (27); 71 (22); 67 (24); 55 (58); 54 (25).

| Chem. Name                                                                                                                                                                                                                                                                                                                                                                                                                                                                                                                                                                                                                                                                                                                                                                                           | 4-(4-cyclohexyl-1H-1,2,3-triazol-1-yl)heptan-2-one |                                                  |              |                   |          |
|------------------------------------------------------------------------------------------------------------------------------------------------------------------------------------------------------------------------------------------------------------------------------------------------------------------------------------------------------------------------------------------------------------------------------------------------------------------------------------------------------------------------------------------------------------------------------------------------------------------------------------------------------------------------------------------------------------------------------------------------------------------------------------------------------|----------------------------------------------------|--------------------------------------------------|--------------|-------------------|----------|
| Lit. Ref.                                                                                                                                                                                                                                                                                                                                                                                                                                                                                                                                                                                                                                                                                                                                                                                            |                                                    |                                                  |              |                   |          |
| <p style="text-align: center;">M.W.: 263.39 g/mol</p>                                                                                                                                                                                                                                                                                                                                                                                                                                                                                                                                                                                                                                                                                                                                                |                                                    |                                                  |              |                   |          |
| <b>METHOD:</b>                                                                                                                                                                                                                                                                                                                                                                                                                                                                                                                                                                                                                                                                                                                                                                                       |                                                    |                                                  |              |                   |          |
| <p>The mixture of <b>1a</b> (5 mmol) and trimethylsilylazide (0.67 mL, 1.02 eq) in azeotrope CH<sub>3</sub>CN:H<sub>2</sub>O (1 mL, 5 M) was pumped through the PTFE reactor, thermostated at 60 °C, packed with <b>POLITAG-F</b> (2.0 g) and quartz powder (0.018 mL/min flow rate measured at the outlet of the first reactor). After a residence time of 3.8 h the resulting azide intermediate formed was mixed, through a T joint, with a 1.2 M solution of ethynylcyclohexane <b>3j</b> (1.2 eq) in CH<sub>3</sub>CN:H<sub>2</sub>O azeotrope pumped at 0.1 mL/min. This mixture was passed in a CTRF heated at 100 °C with a BPR of 10 atm.</p> <p>The azeotrope was recovered by distillation affording in <b>4aj</b> pure product as white solid (1.093 g, 83 % yield, 98% NMR purity).</p> |                                                    |                                                  |              |                   |          |
| <b>Mol Formula</b>                                                                                                                                                                                                                                                                                                                                                                                                                                                                                                                                                                                                                                                                                                                                                                                   |                                                    | C <sub>15</sub> H <sub>25</sub> N <sub>3</sub> O |              | <b>m. p.</b>      | 59-61 °C |
| <b><sup>1</sup>H NMR</b><br>(400 MHz,<br>CDCl <sub>3</sub> )                                                                                                                                                                                                                                                                                                                                                                                                                                                                                                                                                                                                                                                                                                                                         | <b>δ Value</b>                                     | <b>No. H</b>                                     | <b>Mult.</b> | <b>j Value/Hz</b> |          |
|                                                                                                                                                                                                                                                                                                                                                                                                                                                                                                                                                                                                                                                                                                                                                                                                      | 7.24                                               | 1                                                | <i>s</i>     |                   |          |
|                                                                                                                                                                                                                                                                                                                                                                                                                                                                                                                                                                                                                                                                                                                                                                                                      | 4.86-4.81                                          | 1                                                | <i>m</i>     |                   |          |
|                                                                                                                                                                                                                                                                                                                                                                                                                                                                                                                                                                                                                                                                                                                                                                                                      | 3.35                                               | 1                                                | <i>dd</i>    | 18.0-8.1          |          |
|                                                                                                                                                                                                                                                                                                                                                                                                                                                                                                                                                                                                                                                                                                                                                                                                      | 2.90                                               | 1                                                | <i>dd</i>    | 17.8-4.9          |          |
|                                                                                                                                                                                                                                                                                                                                                                                                                                                                                                                                                                                                                                                                                                                                                                                                      | 2.72-2.65                                          | 1                                                | <i>m</i>     |                   |          |
|                                                                                                                                                                                                                                                                                                                                                                                                                                                                                                                                                                                                                                                                                                                                                                                                      | 2.10                                               | 3                                                | <i>s</i>     |                   |          |
|                                                                                                                                                                                                                                                                                                                                                                                                                                                                                                                                                                                                                                                                                                                                                                                                      | 2.08-2.05                                          | 2                                                | <i>m</i>     |                   |          |
|                                                                                                                                                                                                                                                                                                                                                                                                                                                                                                                                                                                                                                                                                                                                                                                                      | 2.04-1.93                                          | 1                                                | <i>m</i>     |                   |          |
|                                                                                                                                                                                                                                                                                                                                                                                                                                                                                                                                                                                                                                                                                                                                                                                                      | 1.83-1.79                                          | 3                                                | <i>m</i>     |                   |          |
|                                                                                                                                                                                                                                                                                                                                                                                                                                                                                                                                                                                                                                                                                                                                                                                                      | 1.79-1.69                                          | 1                                                | <i>m</i>     |                   |          |
|                                                                                                                                                                                                                                                                                                                                                                                                                                                                                                                                                                                                                                                                                                                                                                                                      | 1.40-1.35                                          | 4                                                | <i>m</i>     |                   |          |
|                                                                                                                                                                                                                                                                                                                                                                                                                                                                                                                                                                                                                                                                                                                                                                                                      | 1.22-1.16                                          | 2                                                | <i>m</i>     |                   |          |
| 1.15-1.09                                                                                                                                                                                                                                                                                                                                                                                                                                                                                                                                                                                                                                                                                                                                                                                            | 1                                                  | <i>m</i>                                         |              |                   |          |
| 0.89-0.84                                                                                                                                                                                                                                                                                                                                                                                                                                                                                                                                                                                                                                                                                                                                                                                            | 3                                                  | <i>m</i>                                         |              |                   |          |
| <b><sup>13</sup>C NMR (100.6 MHz, CD)</b> δ: 205.3; 153.0; 120.1; 56.7; 48.5; 37.5; 35.4; 33.1; 26.3; 26.2; 19.3; 13.6                                                                                                                                                                                                                                                                                                                                                                                                                                                                                                                                                                                                                                                                               |                                                    |                                                  |              |                   |          |
| <b>GC-EIMS (m/z, %):</b> 263 (M <sup>+</sup> , 72); 207 (30); 192 (100); 178 (77); 164 (21); 150 (79); 148 (22); 134 (29); 122 (36); 113 (34); 106 (23); 95 (24); 94 (23); 67 (24); 55 (22).                                                                                                                                                                                                                                                                                                                                                                                                                                                                                                                                                                                                         |                                                    |                                                  |              |                   |          |

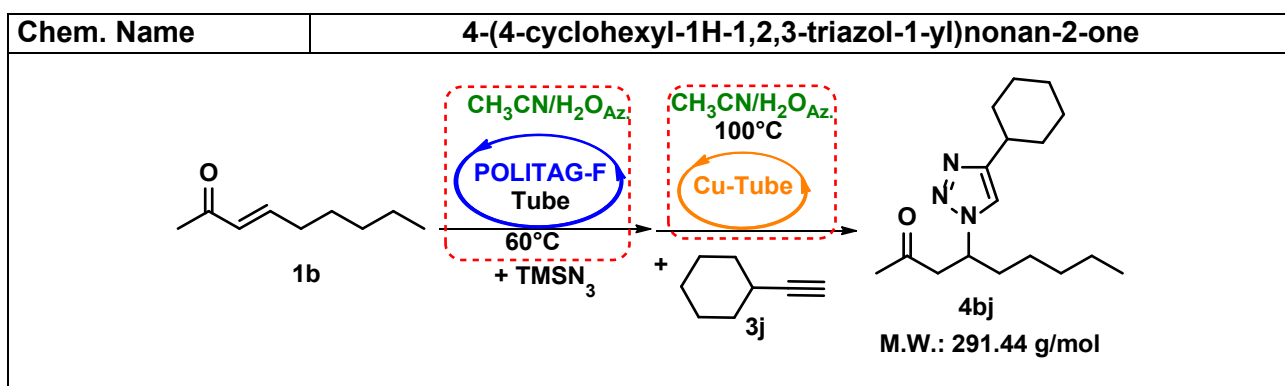

#### METHOD:

The mixture of **1b** (5 mmol) and trimethylsilylazide (0.67 mL, 1.02 eq) in azeotrope CH<sub>3</sub>CN:H<sub>2</sub>O (1 mL, 5 M) was pumped through the PTFE reactor, thermostated at 60 °C, packed with **POLITAG-F** (2.0 g) and quartz powder (0.018 mL/min flow rate measured at the outlet of the first reactor). After a residence time of 3.8 h the resulting azide intermediate formed was mixed, through a T joint, with a 1.2 M solution of ethynylcyclohexane **3j** (1.2 eq) in CH<sub>3</sub>CN:H<sub>2</sub>O azeotrope pumped at 0.1 mL/min. This mixture was passed in a CTRF heated at 100 °C with a BPR of 10 atm. The azeotrope was recovered by distillation affording in **4b<sub>j</sub>** pure product as white solid (1.355 g, 93 % yield, 95% NMR purity).

| Mol Formula                                                              |                | C <sub>17</sub> H <sub>29</sub> N <sub>3</sub> O |              | m. p.             | Oil |
|--------------------------------------------------------------------------|----------------|--------------------------------------------------|--------------|-------------------|-----|
| <b><sup>1</sup>H NMR</b><br><b>(400 MHz,</b><br><b>CDCl<sub>3</sub>)</b> | <b>δ Value</b> | <b>No. H</b>                                     | <b>Mult.</b> | <b>j Value/Hz</b> |     |
|                                                                          | 7.28           | 1                                                | <i>s</i>     |                   |     |
|                                                                          | 4.87-4.80      | 1                                                | <i>m</i>     |                   |     |
|                                                                          | 1.36           | 1                                                | <i>dd</i>    | 18.4-8.2          |     |
|                                                                          | 2.92           | 1                                                | <i>dd</i>    | 17.8-4.8          |     |
|                                                                          | 2.76-7.72      | 1                                                | <i>m</i>     |                   |     |
|                                                                          | 2.11           | 3                                                | <i>s</i>     |                   |     |
|                                                                          | 2.06-2.02      | 2                                                | <i>m</i>     |                   |     |
|                                                                          | 2.01-1.94      | 1                                                | <i>m</i>     |                   |     |
|                                                                          | 1.83-1.80      | 3                                                | <i>m</i>     |                   |     |
|                                                                          | 1.74-1.71      | 1                                                | <i>m</i>     |                   |     |
|                                                                          | 1.42-1.37      | 4                                                | <i>m</i>     |                   |     |
|                                                                          | 1.22-1.17      | 6                                                | <i>m</i>     |                   |     |
|                                                                          | 1.08-1.05      | 1                                                | <i>m</i>     |                   |     |
| 0.85-0.82                                                                | 3              | <i>m</i>                                         |              |                   |     |

**<sup>13</sup>C NMR (100.6 MHz, CDCl<sub>3</sub>) δ:** 205.6, 153.0, 120.1, 56.9, 48.4, 35.3, 35.1, 31.2, 30.5, 26.2, 26.2, 25.6, 22.5, 14.0

**GC-EIMS (m/z, %):** 285 (43); 242 (28); 186 (36); 144 (22); 116 (76); 102 (28); 90 (22); 89 (43).

## 6. NMR copies

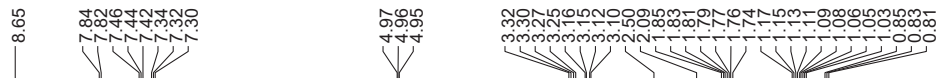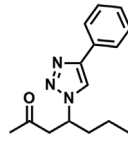

4-(4-phenyl-1H-1,2,3-triazol-1-yl)heptan-2-one  
4aa

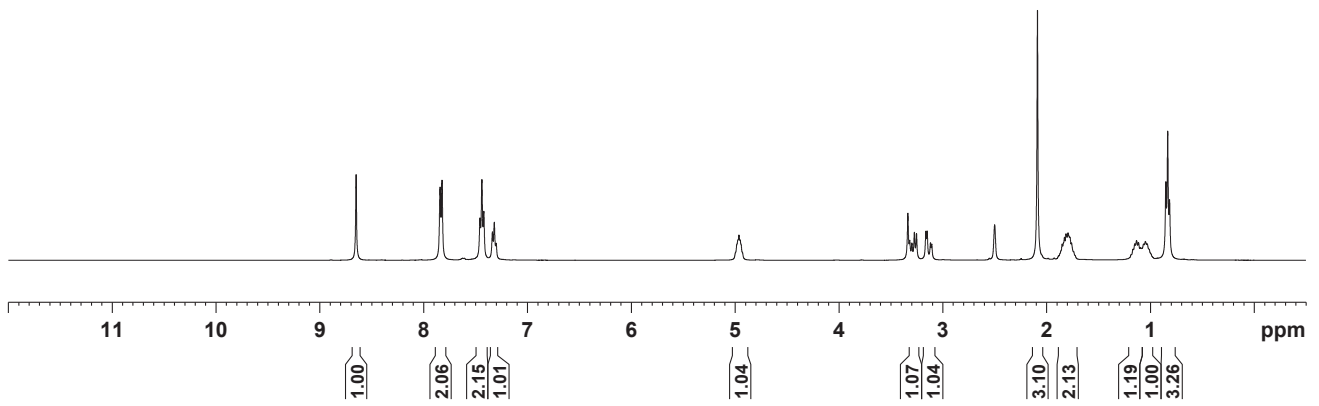

205.42

145.93

130.84, 129.96, 127.09, 125.01, 120.65

56.27

47.41, 40.14, 39.93, 39.72, 39.51, 39.30, 39.10, 38.89, 36.91, 29.95

18.39

13.29

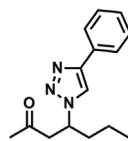

4-(4-phenyl-1H-1,2,3-triazol-1-yl)heptan-2-one  
4aa

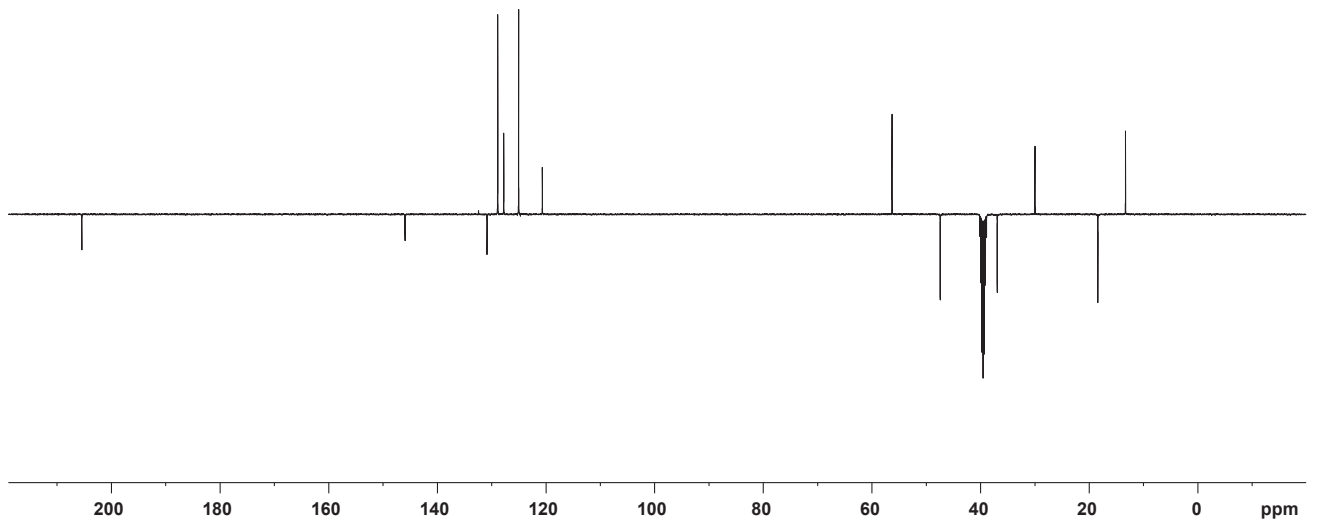

7.84  
7.82  
7.79  
7.43  
7.41  
7.39  
7.33  
7.31  
7.20

4.96  
4.95  
4.93  
4.91  
4.90  
4.89

4.5  
3.43  
3.41  
3.39  
3.38  
3.37  
3.35  
3.34  
3.33  
3.32  
3.31  
3.30  
3.29  
3.28  
3.27  
3.26  
3.25  
3.24  
3.23  
3.22  
3.21  
3.20  
3.19  
3.18  
3.17  
3.16  
3.15  
3.14  
3.13  
3.12  
3.11  
3.10  
3.09  
3.08  
3.07  
3.06  
3.05  
3.04  
3.03  
3.02  
3.01  
3.00  
2.99  
2.98  
2.97  
2.96  
2.95  
2.94  
2.93  
2.92  
2.91  
2.90  
2.89  
2.88  
2.87  
2.86  
2.85  
2.84  
2.83  
2.82  
2.81  
2.80  
2.79  
2.78  
2.77  
2.76  
2.75  
2.74  
2.73  
2.72  
2.71  
2.70  
2.69  
2.68  
2.67  
2.66  
2.65  
2.64  
2.63  
2.62  
2.61  
2.60  
2.59  
2.58  
2.57  
2.56  
2.55  
2.54  
2.53  
2.52  
2.51  
2.50  
2.49  
2.48  
2.47  
2.46  
2.45  
2.44  
2.43  
2.42  
2.41  
2.40  
2.39  
2.38  
2.37  
2.36  
2.35  
2.34  
2.33  
2.32  
2.31  
2.30  
2.29  
2.28  
2.27  
2.26  
2.25  
2.24  
2.23  
2.22  
2.21  
2.20  
2.19  
2.18  
2.17  
2.16  
2.15  
2.14  
2.13  
2.12  
2.11  
2.10  
2.09  
2.08  
2.07  
2.06  
2.05  
2.04  
2.03  
2.02  
2.01  
2.00  
1.99  
1.98  
1.97  
1.96  
1.95  
1.94  
1.93  
1.92  
1.91  
1.90  
1.89  
1.88  
1.87  
1.86  
1.85  
1.84  
1.83  
1.82  
1.81  
1.80  
1.79  
1.78  
1.77  
1.76  
1.75  
1.74  
1.73  
1.72  
1.71  
1.70  
1.69  
1.68  
1.67  
1.66  
1.65  
1.64  
1.63  
1.62  
1.61  
1.60  
1.59  
1.58  
1.57  
1.56  
1.55  
1.54  
1.53  
1.52  
1.51  
1.50  
1.49  
1.48  
1.47  
1.46  
1.45  
1.44  
1.43  
1.42  
1.41  
1.40  
1.39  
1.38  
1.37  
1.36  
1.35  
1.34  
1.33  
1.32  
1.31  
1.30  
1.29  
1.28  
1.27  
1.26  
1.25  
1.24  
1.23  
1.22  
1.21  
1.20  
1.19  
1.18  
1.17  
1.16  
1.15  
1.14  
1.13  
1.12  
1.11  
1.10  
1.09  
1.08  
1.07  
1.06  
1.05  
1.04  
1.03  
1.02  
1.01  
1.00  
0.99  
0.98  
0.97  
0.96  
0.95  
0.94  
0.93  
0.92  
0.91  
0.90  
0.89  
0.88  
0.87  
0.86  
0.85  
0.84

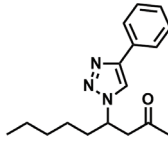

4-(4-phenyl-1H-1,2,3-triazol-1-yl)nonan-2-one

4ba

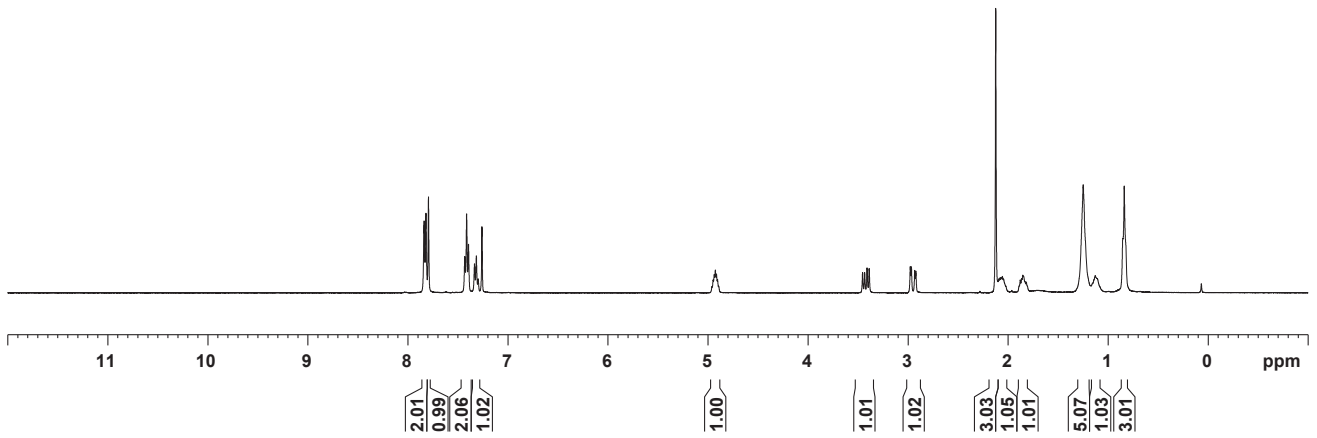

205.37

147.04

130.79  
128.92  
128.18  
125.78  
120.67

77.47  
77.16  
76.84

57.30

48.41

35.25

31.30

30.56

25.69

22.49

14.05

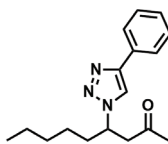

4-(4-phenyl-1H-1,2,3-triazol-1-yl)nonan-2-one

4ba

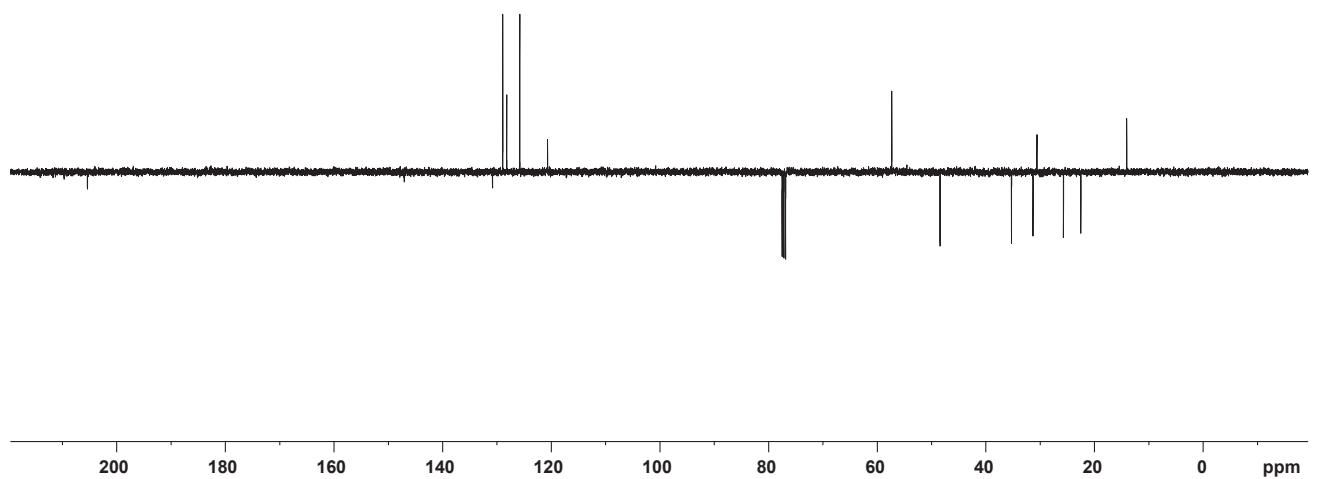

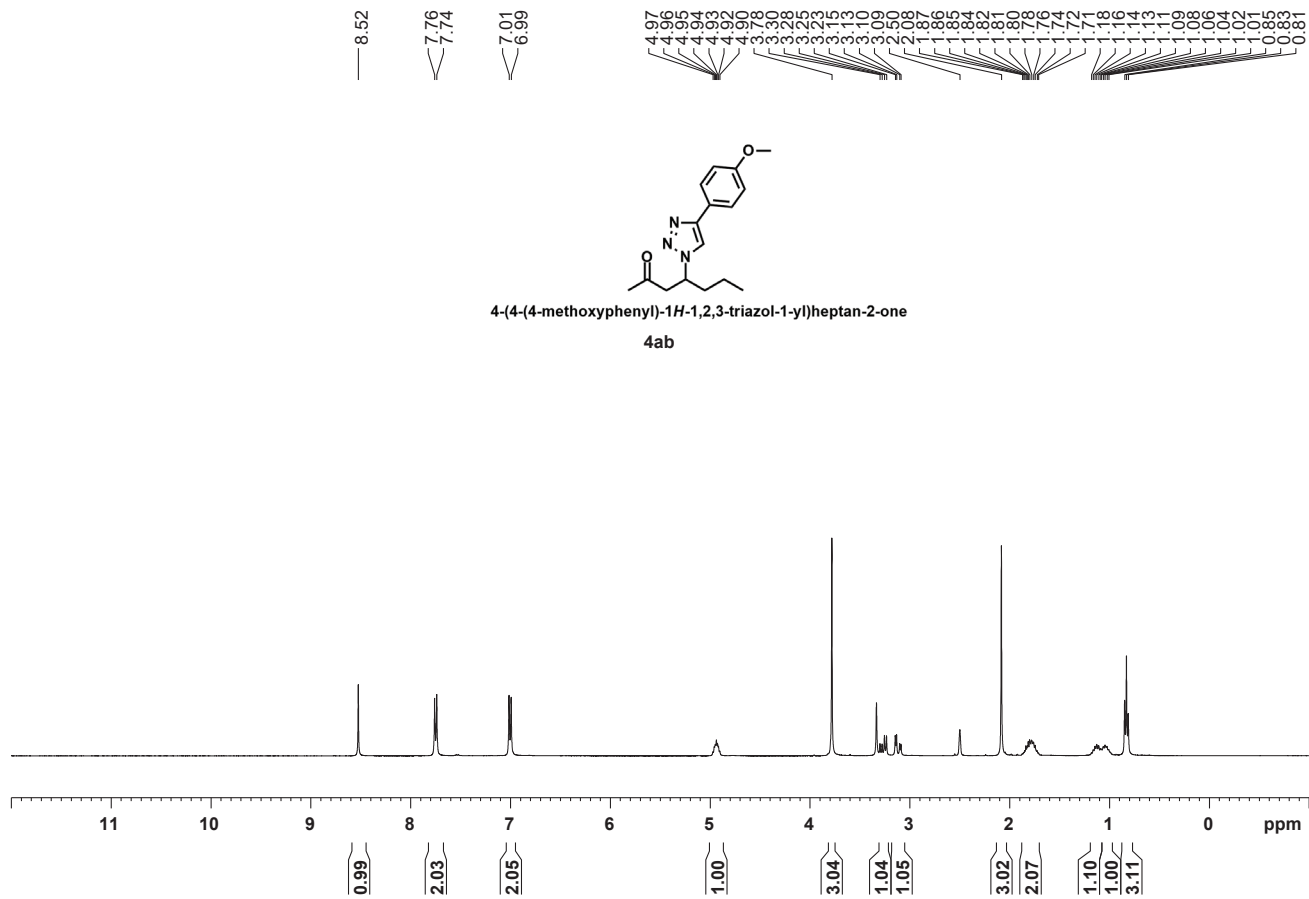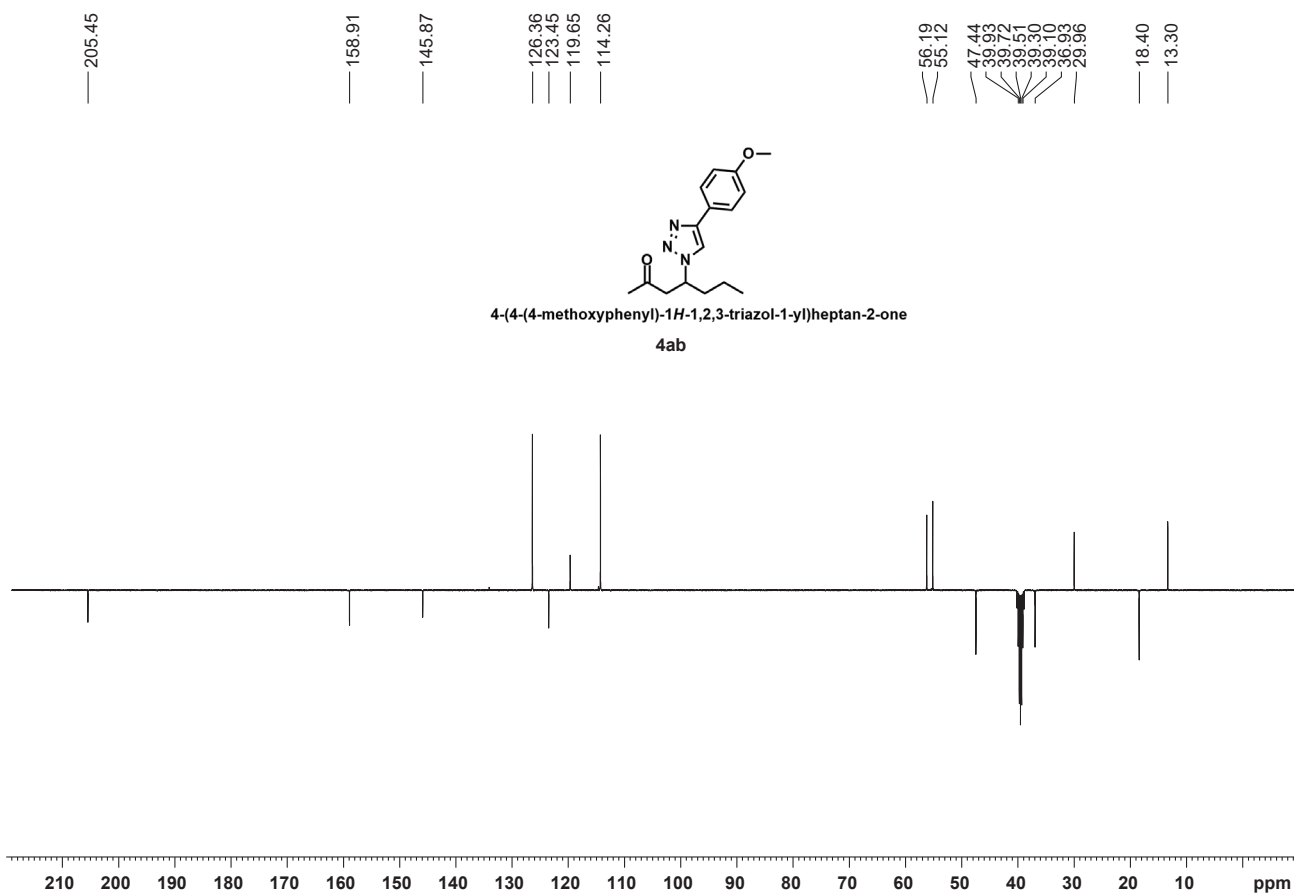



7.76  
7.74  
7.70  
7.26  
6.96  
6.94

4.95  
4.93  
4.91  
4.90  
4.88  
4.84  
4.74  
4.72  
4.70  
4.68  
4.66  
4.64  
4.62  
4.60  
4.58  
4.56  
4.54  
4.52  
4.50  
4.48  
4.46  
4.44  
4.42  
4.40  
4.38  
4.36  
4.34  
4.32  
4.30  
4.28  
4.26  
4.24  
4.22  
4.20  
4.18  
4.16  
4.14  
4.12  
4.10  
4.08  
4.06  
4.04  
4.02  
4.00  
3.98  
3.96  
3.94  
3.92  
3.90  
3.88  
3.86  
3.84  
3.82  
3.80  
3.78  
3.76  
3.74  
3.72  
3.70  
3.68  
3.66  
3.64  
3.62  
3.60  
3.58  
3.56  
3.54  
3.52  
3.50  
3.48  
3.46  
3.44  
3.42  
3.40  
3.38  
3.36  
3.34  
3.32  
3.30  
3.28  
3.26  
3.24  
3.22  
3.20  
3.18  
3.16  
3.14  
3.12  
3.10  
3.08  
3.06  
3.04  
3.02  
3.00  
2.98  
2.96  
2.94  
2.92  
2.90  
2.88  
2.86  
2.84  
2.82  
2.80  
2.78  
2.76  
2.74  
2.72  
2.70  
2.68  
2.66  
2.64  
2.62  
2.60  
2.58  
2.56  
2.54  
2.52  
2.50  
2.48  
2.46  
2.44  
2.42  
2.40  
2.38  
2.36  
2.34  
2.32  
2.30  
2.28  
2.26  
2.24  
2.22  
2.20  
2.18  
2.16  
2.14  
2.12  
2.10  
2.08  
2.06  
2.04  
2.02  
2.00  
1.98  
1.96  
1.94  
1.92  
1.90  
1.88  
1.86  
1.84  
1.82  
1.80  
1.78  
1.76  
1.74  
1.72  
1.70  
1.68  
1.66  
1.64  
1.62  
1.60  
1.58  
1.56  
1.54  
1.52  
1.50  
1.48  
1.46  
1.44  
1.42  
1.40  
1.38  
1.36  
1.34  
1.32  
1.30  
1.28  
1.26  
1.24  
1.22  
1.20  
1.18  
1.16  
1.14  
1.12  
1.10  
1.08  
1.06  
1.04  
1.02  
1.00  
0.98  
0.96  
0.94  
0.92  
0.90  
0.88  
0.86  
0.84  
0.82  
0.80  
0.78  
0.76  
0.74  
0.72  
0.70  
0.68  
0.66  
0.64  
0.62  
0.60  
0.58  
0.56  
0.54  
0.52  
0.50  
0.48  
0.46  
0.44  
0.42  
0.40  
0.38  
0.36  
0.34  
0.32  
0.30  
0.28  
0.26  
0.24  
0.22  
0.20  
0.18  
0.16  
0.14  
0.12  
0.10  
0.08  
0.06  
0.04  
0.02  
0.00

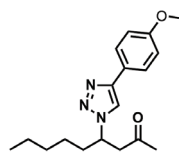

4-(4-(4-methoxyphenyl)-1H-1,2,3-triazol-1-yl)nonan-2-one

4bb

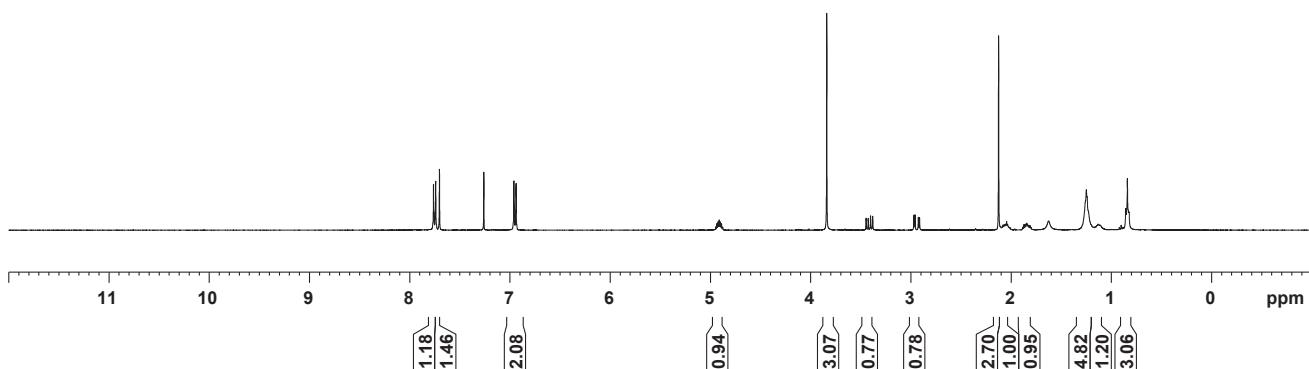

205.45

159.66

146.93

127.10

123.53

119.85

114.34

77.48

77.06

76.84

57.25

55.46

48.43

35.28

31.32

30.59

25.70

22.50

14.06

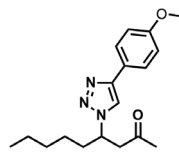

4-(4-(4-methoxyphenyl)-1H-1,2,3-triazol-1-yl)nonan-2-one

4bb

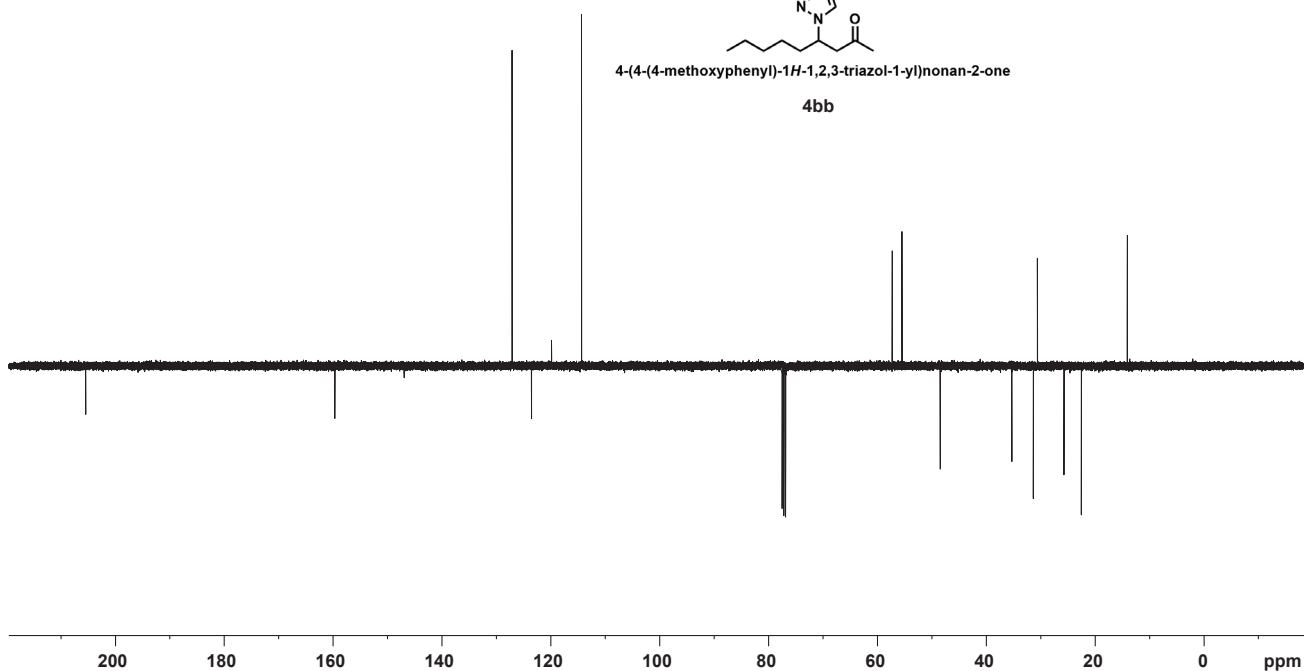

7.80  
7.71  
7.69  
7.54  
7.52  
7.26

4.07  
4.06  
4.04  
4.04  
4.03  
4.02  
3.90  
3.44  
3.39  
3.37  
3.36  
3.33  
3.32  
3.22  
3.09  
3.09  
3.06  
3.06  
3.04  
3.02  
3.02  
1.86  
1.85  
1.84  
1.83  
1.81  
1.80  
1.79  
1.78  
2.29  
2.28  
2.26  
2.24  
2.23  
2.22  
2.21  
2.20  
1.19  
1.18  
1.15  
1.14  
1.12  
0.92  
0.90  
0.88

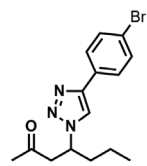

4-(4-(4-bromophenyl)-1H-1,2,3-triazol-1-yl)heptan-2-one

4ac

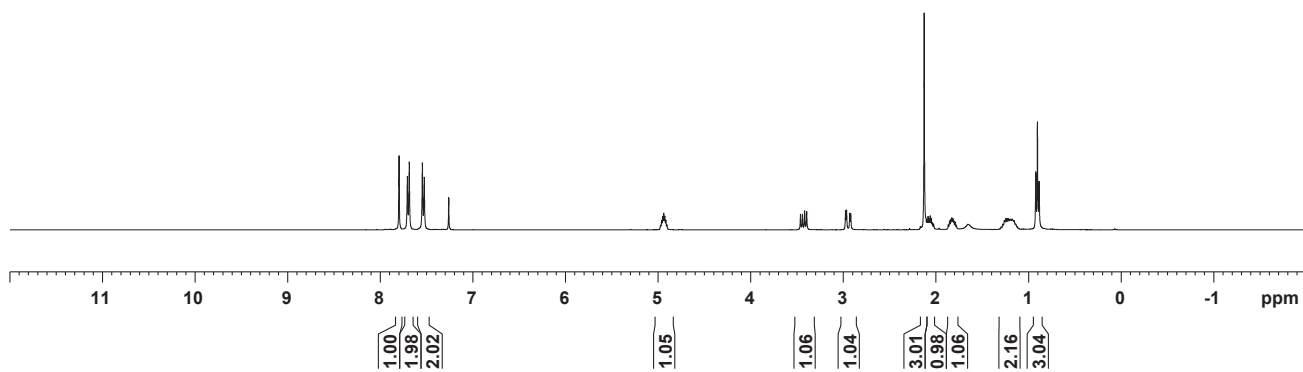

205.30

145.99

132.05  
129.76  
127.31  
122.02  
120.87

77.46  
77.15  
76.83

57.11

48.31

37.26

30.52

19.28

13.59

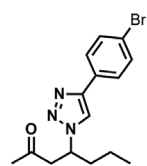

4-(4-(4-bromophenyl)-1H-1,2,3-triazol-1-yl)heptan-2-one

4ac

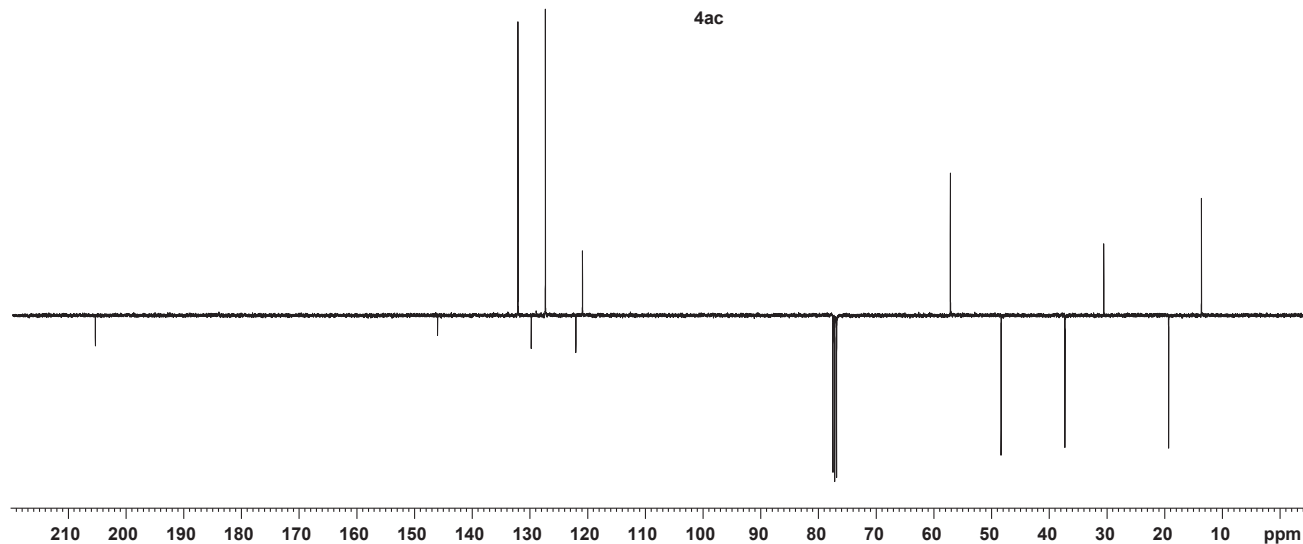

7.80  
7.71  
7.68  
7.64  
7.52  
7.26

4.95  
4.93  
4.91  
4.90  
4.89  
4.88

3.45  
3.42  
3.40  
3.38  
3.37  
3.36  
3.35  
3.33  
3.32  
3.31  
3.29  
3.27  
3.06  
3.05  
3.03  
2.87  
2.86  
2.84  
2.81  
2.71  
0.83

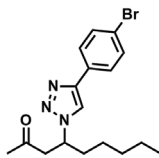

4-(4-(4-bromophenyl)-1H-1,2,3-triazol-1-yl)nonan-2-one  
4bc

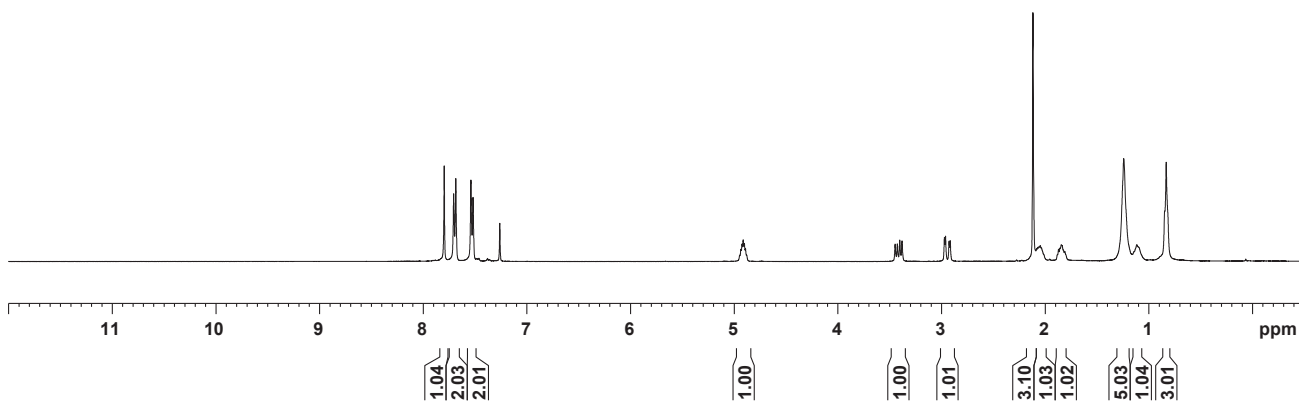

— 205.29

— 145.97  
— 132.04  
— 129.77  
— 127.30  
— 121.99  
— 120.84

— 77.48  
— 77.16  
— 76.84

— 57.36

— 48.31

— 35.18

— 31.27

— 30.50

— 25.67

— 22.46

— 14.03

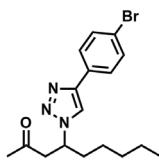

4-(4-(4-bromophenyl)-1H-1,2,3-triazol-1-yl)nonan-2-one  
4bc

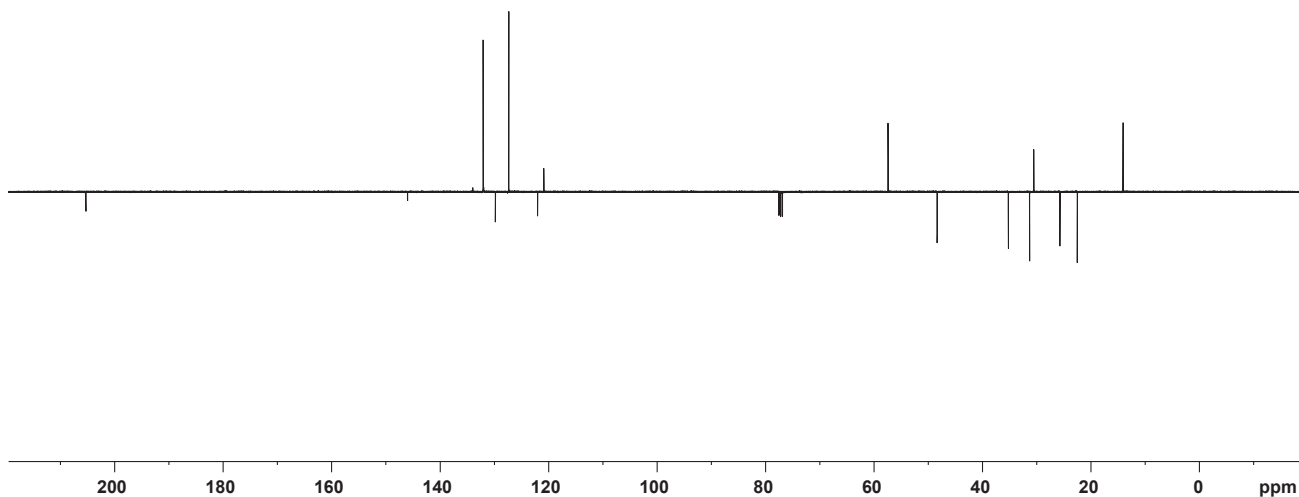

7.955  
7.775  
7.772  
7.769  
7.691  
7.690  
7.689  
7.686

4.998  
4.987  
4.965  
4.955  
4.943

4.46  
4.44  
4.09  
4.00  
3.99  
3.96  
3.93  
3.92  
3.88  
3.87  
3.86  
3.83  
3.82  
3.81  
3.80  
3.66  
3.65  
3.63  
3.62  
3.61  
3.60  
3.59  
3.58  
3.57  
3.56  
3.55  
3.54  
3.53  
3.52  
3.51  
3.50  
3.49  
3.48  
3.47  
3.46  
3.45  
3.44  
3.43  
3.42  
3.41  
3.40  
3.39  
3.38  
3.37  
3.36  
3.35  
3.34  
3.33  
3.32  
3.31  
3.30  
3.29  
3.28  
3.27  
3.26  
3.25  
3.24  
3.23  
3.22  
3.21  
3.20  
3.19  
3.18  
3.17  
3.16  
3.15  
3.14  
3.13  
3.12  
3.11  
3.10  
3.09  
3.08  
3.07  
3.06  
3.05  
3.04  
3.03  
3.02  
3.01  
3.00  
2.99  
2.98  
2.97  
2.96  
2.95  
2.94  
2.93  
2.92  
2.91  
2.90  
2.89  
2.88  
2.87  
2.86  
2.85  
2.84  
2.83  
2.82  
2.81  
2.80  
2.79  
2.78  
2.77  
2.76  
2.75  
2.74  
2.73  
2.72  
2.71  
2.70  
2.69  
2.68  
2.67  
2.66  
2.65  
2.64  
2.63  
2.62  
2.61  
2.60  
2.59  
2.58  
2.57  
2.56  
2.55  
2.54  
2.53  
2.52  
2.51  
2.50  
2.49  
2.48  
2.47  
2.46  
2.45  
2.44  
2.43  
2.42  
2.41  
2.40  
2.39  
2.38  
2.37  
2.36  
2.35  
2.34  
2.33  
2.32  
2.31  
2.30  
2.29  
2.28  
2.27  
2.26  
2.25  
2.24  
2.23  
2.22  
2.21  
2.20  
2.19  
2.18  
2.17  
2.16  
2.15  
2.14  
2.13  
2.12  
2.11  
2.10  
2.09  
2.08  
2.07  
2.06  
2.05  
2.04  
2.03  
2.02  
2.01  
2.00  
1.99  
1.98  
1.97  
1.96  
1.95  
1.94  
1.93  
1.92  
1.91  
1.90  
1.89  
1.88  
1.87  
1.86  
1.85  
1.84  
1.83  
1.82  
1.81  
1.80  
1.79  
1.78  
1.77  
1.76  
1.75  
1.74  
1.73  
1.72  
1.71  
1.70  
1.69  
1.68  
1.67  
1.66  
1.65  
1.64  
1.63  
1.62  
1.61  
1.60  
1.59  
1.58  
1.57  
1.56  
1.55  
1.54  
1.53  
1.52  
1.51  
1.50  
1.49  
1.48  
1.47  
1.46  
1.45  
1.44  
1.43  
1.42  
1.41  
1.40  
1.39  
1.38  
1.37  
1.36  
1.35  
1.34  
1.33  
1.32  
1.31  
1.30  
1.29  
1.28  
1.27  
1.26  
1.25  
1.24  
1.23  
1.22  
1.21  
1.20  
1.19  
1.18  
1.17  
1.16  
1.15  
1.14  
1.13  
1.12  
1.11  
1.10  
1.09  
1.08  
1.07  
1.06  
1.05  
1.04  
1.03  
1.02  
1.01  
1.00  
0.99  
0.98  
0.97  
0.96  
0.95  
0.94  
0.93  
0.92  
0.91  
0.90  
0.89  
0.88  
0.87  
0.86  
0.85  
0.84  
0.83  
0.82  
0.81  
0.80  
0.79  
0.78  
0.77  
0.76  
0.75  
0.74  
0.73  
0.72  
0.71  
0.70  
0.69  
0.68  
0.67  
0.66  
0.65  
0.64  
0.63  
0.62  
0.61  
0.60  
0.59  
0.58  
0.57  
0.56  
0.55  
0.54  
0.53  
0.52  
0.51  
0.50  
0.49  
0.48  
0.47  
0.46  
0.45  
0.44  
0.43  
0.42  
0.41  
0.40  
0.39  
0.38  
0.37  
0.36  
0.35  
0.34  
0.33  
0.32  
0.31  
0.30  
0.29  
0.28  
0.27  
0.26  
0.25  
0.24  
0.23  
0.22  
0.21  
0.20  
0.19  
0.18  
0.17  
0.16  
0.15  
0.14  
0.13  
0.12  
0.11  
0.10  
0.09  
0.08  
0.07  
0.06  
0.05  
0.04  
0.03  
0.02  
0.01  
0.00

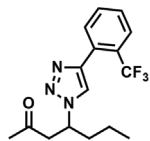

4-(4-(2-(trifluoromethyl)phenyl)-1H-1,2,3-triazol-1-yl)heptan-2-one

4ad

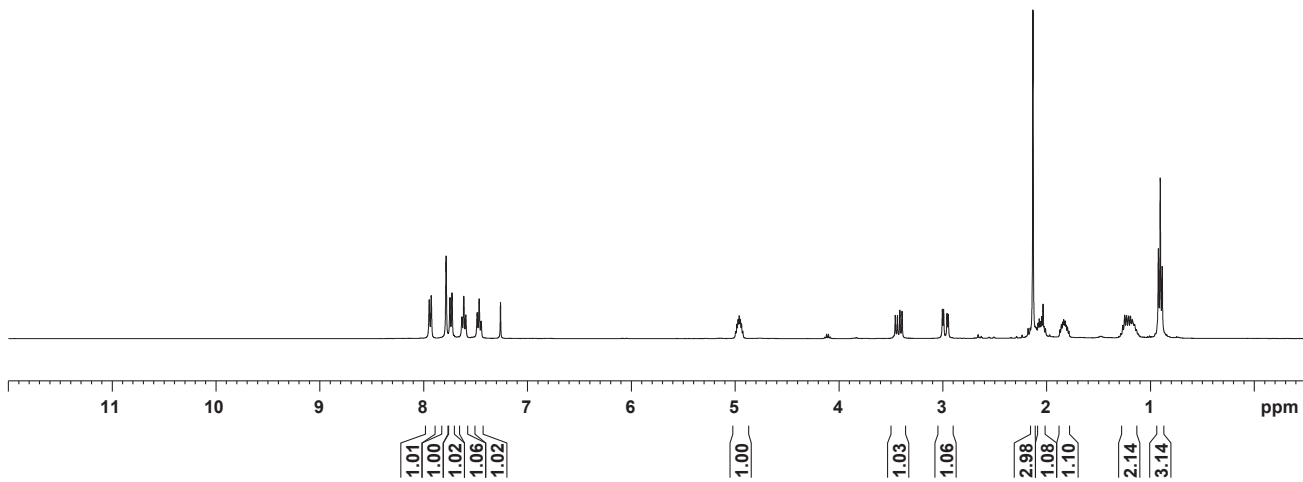

-58.74

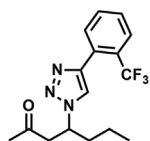

4-(4-(2-(trifluoromethyl)phenyl)-1H-1,2,3-triazol-1-yl)heptan-2-one

4ad

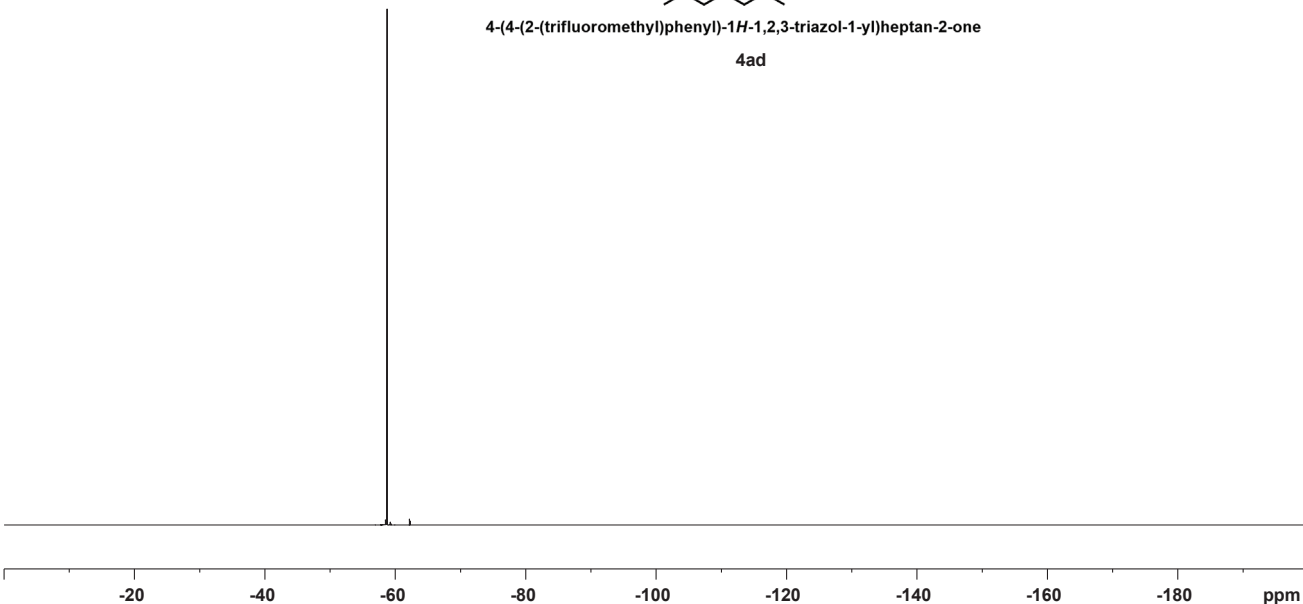

— 205.08

143.45  
132.00  
131.99  
131.97  
129.70  
129.68  
129.66  
128.24  
127.58  
126.19  
126.14  
126.08  
126.02  
125.53  
123.92  
123.86  
123.81  
123.69  
122.82

77.48  
77.16  
76.84

— 57.04

— 48.23

— 37.23

— 30.37

— 19.00

— 13.42

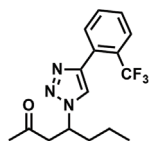

4-(4-(2-(trifluoromethyl)phenyl)-1H-1,2,3-triazol-1-yl)heptan-2-one

4ad

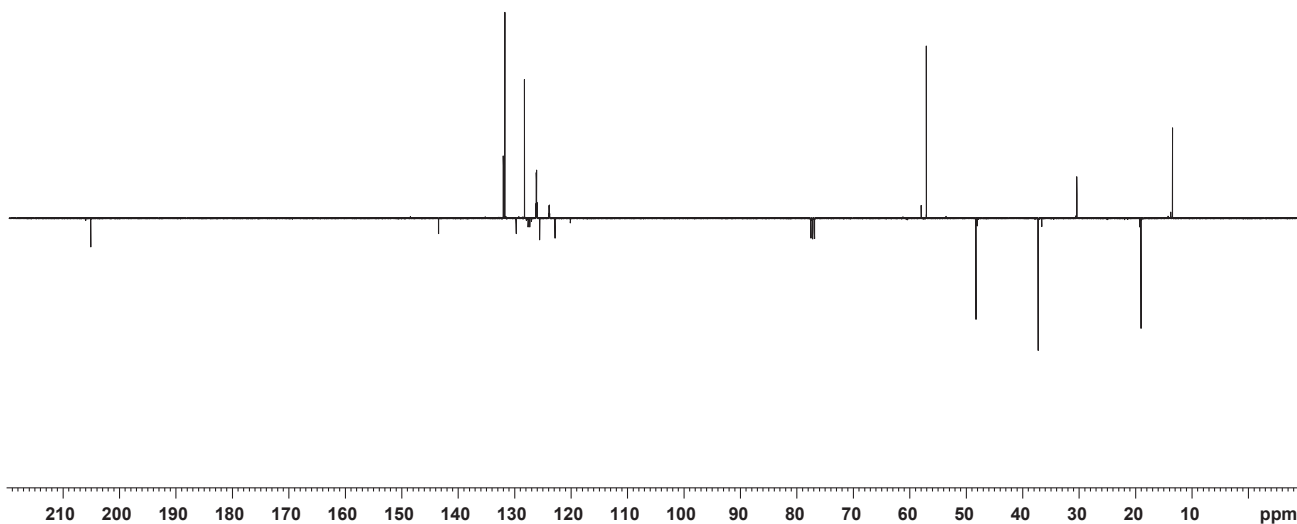

7.92  
7.90  
7.77  
7.72  
7.70  
7.61  
7.59  
7.57  
7.46  
7.44  
7.42  
7.26

4.95  
4.94  
4.92  
4.91  
4.90  
4.89

3.43  
3.41  
3.39  
3.37  
2.99  
2.98  
2.94  
2.93

2.10  
2.01  
1.86  
1.84

1.22  
1.09

— 0.81

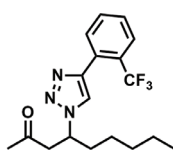

4-(4-(2-(trifluoromethyl)phenyl)-1H-1,2,3-triazol-1-yl)nonan-2-one

4bd

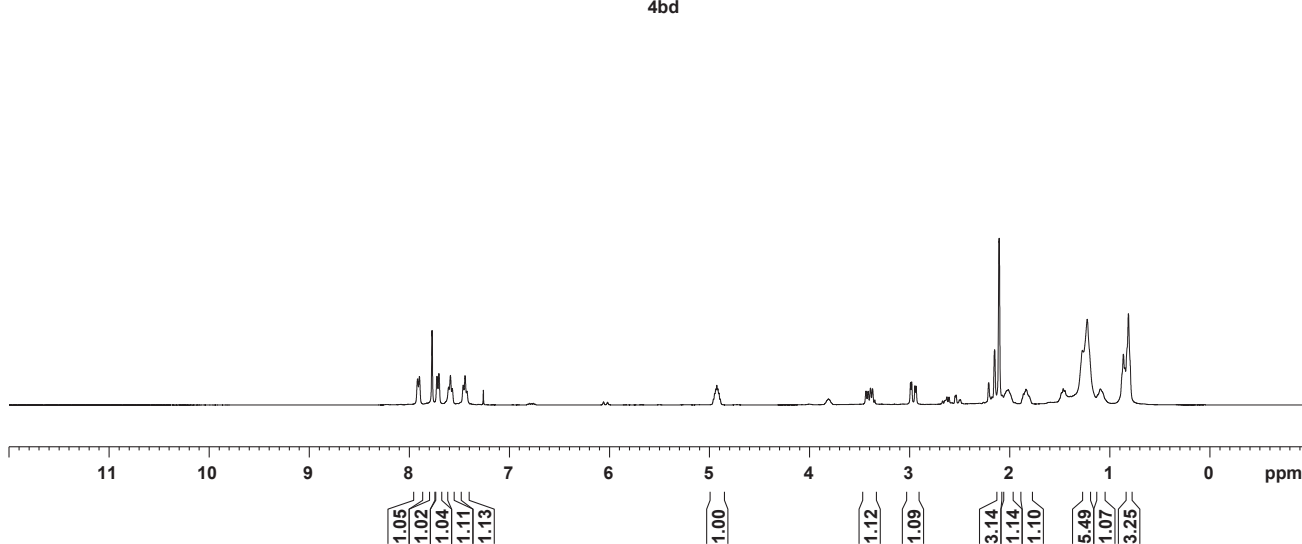

— 58.73

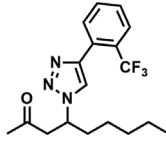

4-(4-(2-(trifluoromethyl)phenyl)-1H-1,2,3-triazol-1-yl)nonan-2-one  
4bd

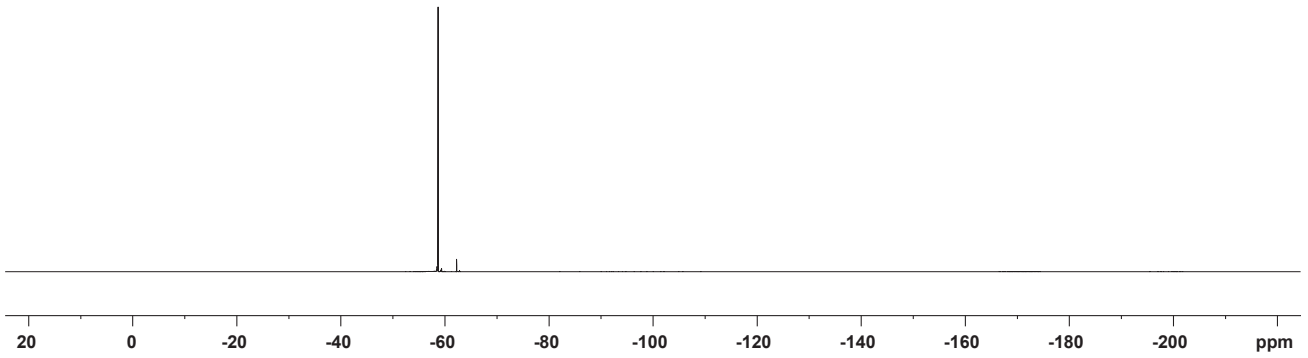

— 205.19

143.52  
132.05  
131.79  
129.74  
128.30  
127.39  
126.21  
126.15  
125.59  
123.96  
122.87

77.48  
77.16  
76.84

— 57.36

— 48.33

35.25

31.17

30.48

25.48

22.44

— 13.93

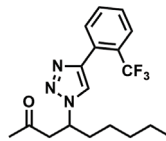

4-(4-(2-(trifluoromethyl)phenyl)-1H-1,2,3-triazol-1-yl)nonan-2-one  
4bd

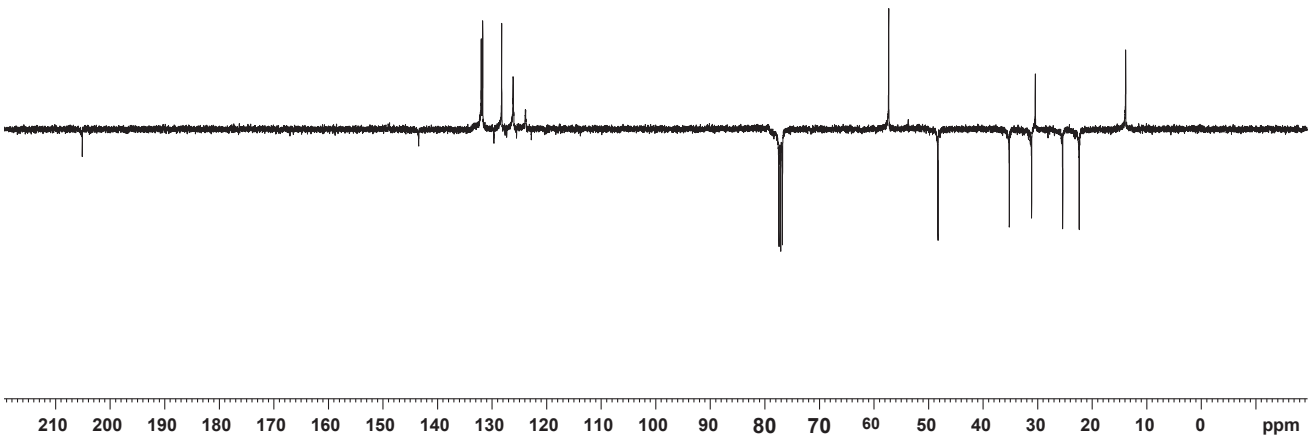

7.75  
7.72  
7.70  
7.26  
7.23  
7.21

4.95  
4.94  
4.93

3.45  
3.43  
3.40  
3.38  
3.37  
3.36  
3.35  
3.34  
3.33  
3.32  
3.31  
3.30  
3.29  
3.28  
3.27  
3.26  
3.25  
3.24  
3.23  
3.22  
3.21  
3.20  
3.19  
3.18  
3.17  
3.16  
3.15  
3.14  
3.13  
3.12  
3.11  
3.10  
3.09  
3.08  
3.07  
3.06  
3.05  
3.04  
3.03  
3.02  
3.01  
3.00  
2.99  
2.98  
2.97  
2.96  
2.95  
2.94  
2.93  
2.92  
2.91  
2.90  
2.89  
2.88  
2.87  
2.86  
2.85  
2.84  
2.83  
2.82  
2.81  
2.80  
2.79  
2.78  
2.77  
2.76  
2.75  
2.74  
2.73  
2.72  
2.71  
2.70  
2.69  
2.68  
2.67  
2.66  
2.65  
2.64  
2.63  
2.62  
2.61  
2.60  
2.59  
2.58  
2.57  
2.56  
2.55  
2.54  
2.53  
2.52  
2.51  
2.50  
2.49  
2.48  
2.47  
2.46  
2.45  
2.44  
2.43  
2.42  
2.41  
2.40  
2.39  
2.38  
2.37  
2.36  
2.35  
2.34  
2.33  
2.32  
2.31  
2.30  
2.29  
2.28  
2.27  
2.26  
2.25  
2.24  
2.23  
2.22  
2.21  
2.20  
2.19  
2.18  
2.17  
2.16  
2.15  
2.14  
2.13  
2.12  
2.11  
2.10  
2.09  
2.08  
2.07  
2.06  
2.05  
2.04  
2.03  
2.02  
2.01  
2.00  
1.99  
1.98  
1.97  
1.96  
1.95  
1.94  
1.93  
1.92  
1.91  
1.90  
1.89  
1.88  
1.87  
1.86  
1.85  
1.84  
1.83  
1.82  
1.81  
1.80  
1.79  
1.78  
1.77  
1.76  
1.75  
1.74  
1.73  
1.72  
1.71  
1.70  
1.69  
1.68  
1.67  
1.66  
1.65  
1.64  
1.63  
1.62  
1.61  
1.60  
1.59  
1.58  
1.57  
1.56  
1.55  
1.54  
1.53  
1.52  
1.51  
1.50  
1.49  
1.48  
1.47  
1.46  
1.45  
1.44  
1.43  
1.42  
1.41  
1.40  
1.39  
1.38  
1.37  
1.36  
1.35  
1.34  
1.33  
1.32  
1.31  
1.30  
1.29  
1.28  
1.27  
1.26  
1.25  
1.24  
1.23  
1.22  
1.21  
1.20  
1.19  
1.18  
1.17  
1.16  
1.15  
1.14  
1.13  
1.12  
1.11  
1.10  
1.09  
1.08  
1.07  
1.06  
1.05  
1.04  
1.03  
1.02  
1.01  
1.00  
0.99  
0.98  
0.97  
0.96  
0.95  
0.94  
0.93  
0.92  
0.91  
0.90  
0.89  
0.88  
0.87  
0.86  
0.85  
0.84  
0.83  
0.82  
0.81  
0.80  
0.79  
0.78  
0.77  
0.76  
0.75  
0.74  
0.73  
0.72  
0.71  
0.70  
0.69  
0.68  
0.67  
0.66  
0.65  
0.64  
0.63  
0.62  
0.61  
0.60  
0.59  
0.58  
0.57  
0.56  
0.55  
0.54  
0.53  
0.52  
0.51  
0.50  
0.49  
0.48  
0.47  
0.46  
0.45  
0.44  
0.43  
0.42  
0.41  
0.40  
0.39  
0.38  
0.37  
0.36  
0.35  
0.34  
0.33  
0.32  
0.31  
0.30  
0.29  
0.28  
0.27  
0.26  
0.25  
0.24  
0.23  
0.22  
0.21  
0.20  
0.19  
0.18  
0.17  
0.16  
0.15  
0.14  
0.13  
0.12  
0.11  
0.10  
0.09  
0.08  
0.07  
0.06  
0.05  
0.04  
0.03  
0.02  
0.01  
0.00

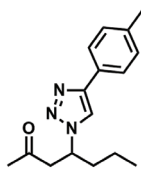

4-(4-(p-tolyl)-1H-1,2,3-triazol-1-yl)heptan-2-one

4ae

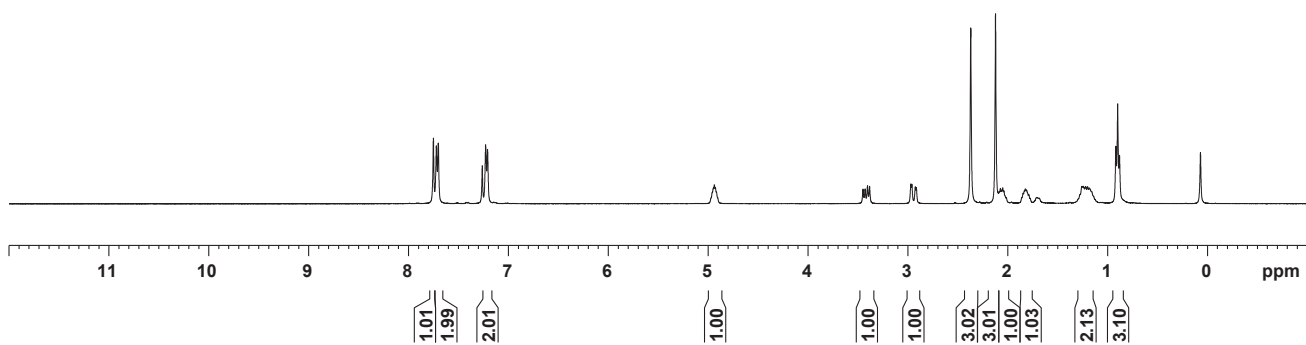

— 205.38

— 147.13

— 137.98

— 129.59

— 127.96

— 125.68

— 120.29

— 77.48

— 77.16

— 76.84

— 56.98

— 48.39

— 37.33

— 30.56

— 21.41

— 19.27

— 13.61

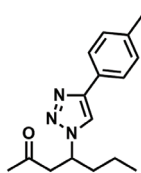

4-(4-(p-tolyl)-1H-1,2,3-triazol-1-yl)heptan-2-one

4ae

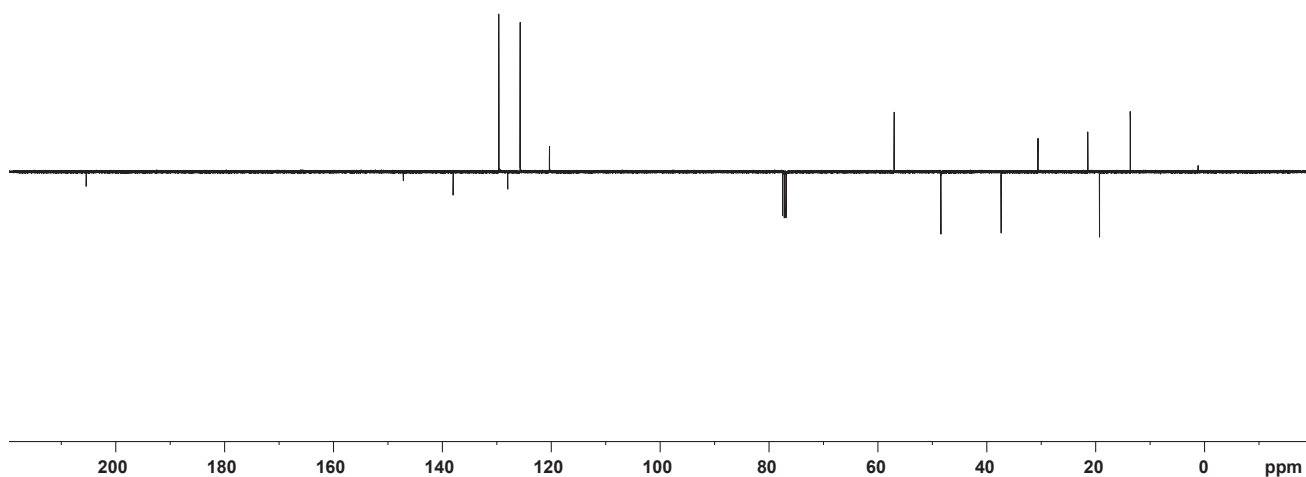

7.75  
7.72  
7.70  
7.26  
7.23  
7.21

4.05  
4.04  
4.03  
4.02  
4.01  
4.00

3.45  
3.43  
3.40  
3.38  
3.37  
3.35  
3.33  
3.32  
3.29  
3.28  
3.07  
3.06  
3.05  
3.04  
2.89  
2.87  
2.86  
2.85  
1.84  
1.83  
1.81  
1.75  
1.73  
1.16  
0.85  
0.84

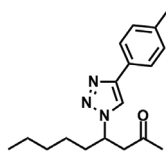

4-(4-(p-tolyl)-1H-1,2,3-triazol-1-yl)nonan-2-one  
4be

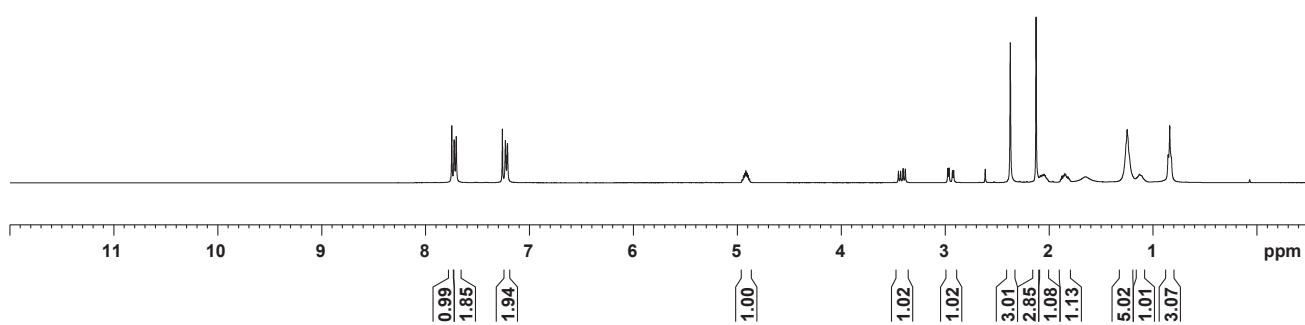

205.42

147.13  
138.00  
129.60  
127.07  
125.89  
120.28

77.47  
77.15  
76.83

57.26  
48.43  
35.27  
31.31  
30.58  
25.69  
22.50  
21.42  
14.05

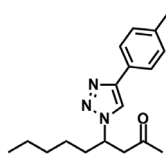

4-(4-(p-tolyl)-1H-1,2,3-triazol-1-yl)nonan-2-one  
4be

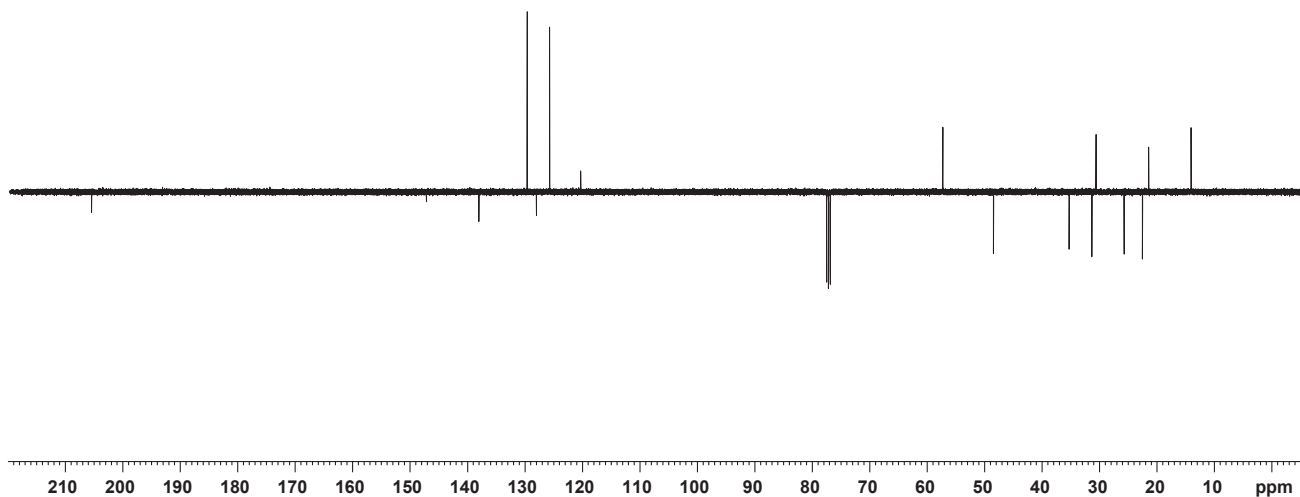



8.27  
7.98  
7.80  
7.26

5.00  
4.99  
4.97  
4.96  
4.95  
3.49  
3.47  
3.45  
3.43  
3.00  
2.99  
2.95  
2.93  
2.91  
2.88  
2.87  
2.07  
2.06  
1.89  
1.88  
1.86  
1.84  
1.83  
1.82  
1.80  
1.29  
1.27  
1.25  
1.23  
1.19  
0.99  
0.91  
0.89

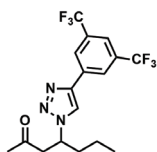

4-(4-(3,5-bis(trifluoromethyl)phenyl)-1H-1,2,3-triazol-1-yl)heptan-2-one

4af

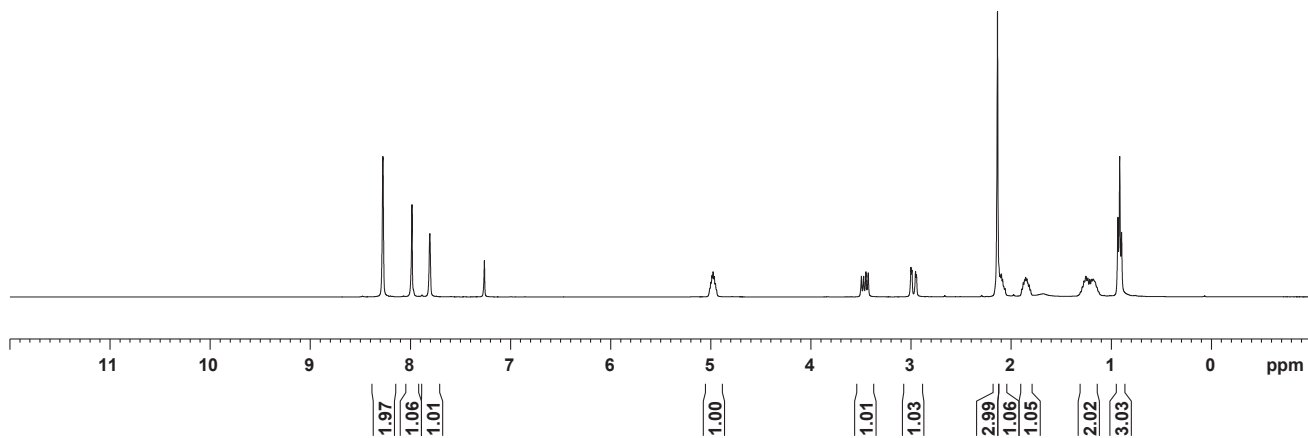

-63.04

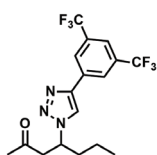

4-(4-(3,5-bis(trifluoromethyl)phenyl)-1H-1,2,3-triazol-1-yl)heptan-2-one

4af

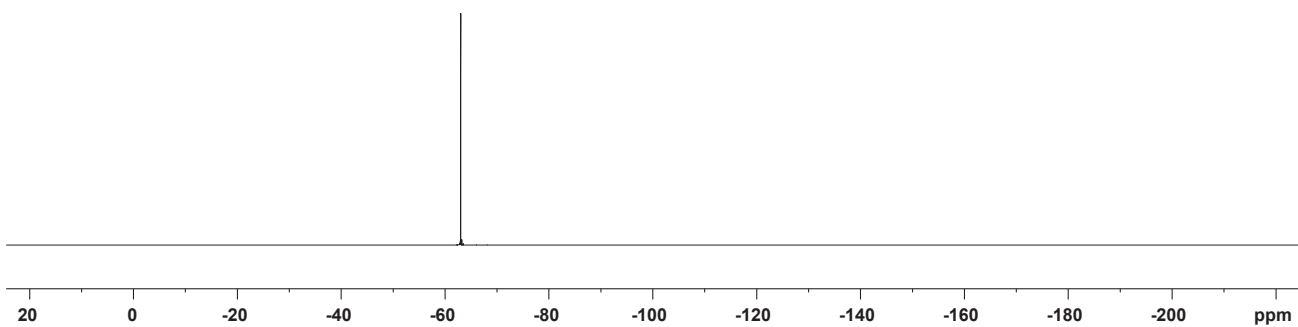

— 205.18

144.30  
133.00  
132.78  
132.49  
131.78  
127.48  
125.70  
125.69  
124.72  
122.04  
121.52  
121.48  
121.45  
121.41

77.47  
77.16  
76.84

— 57.40

— 48.18

— 37.14

— 30.38

— 19.25

— 13.51

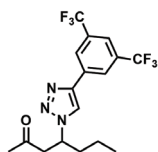

4-(4-(3,5-bis(trifluoromethyl)phenyl)-1H-1,2,3-triazol-1-yl)heptan-2-one

4af

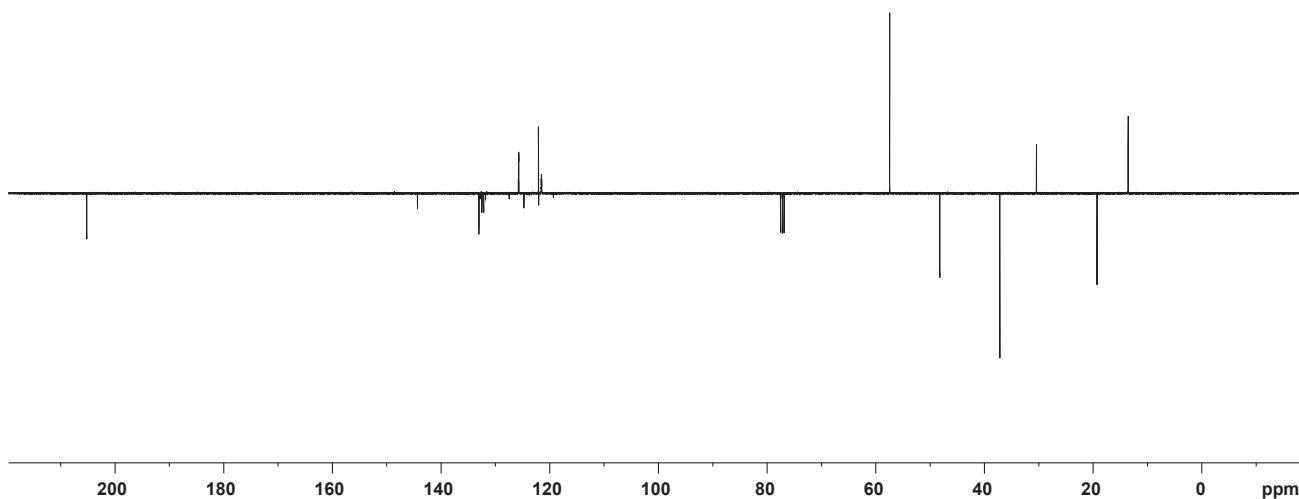

— 8.28

— 7.98

— 7.81

— 7.26

— 4.95

3.49

3.46

3.44

3.42

3.00

2.95

— 2.13

— 1.87

— 1.26

— 1.12

— 0.84

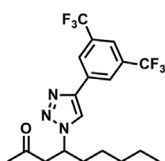

4-(4-(3,5-bis(trifluoromethyl)phenyl)-1H-1,2,3-triazol-1-yl)nonan-2-one

4bf

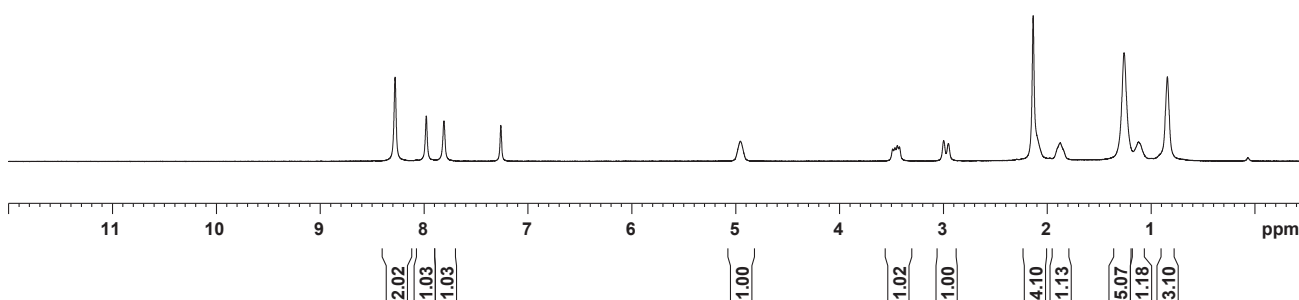

— -63.00

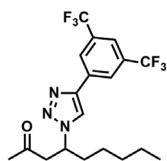

4-(4-(3,5-bis(trifluoromethyl)phenyl)-1H-1,2,3-triazol-1-yl)nonan-2-one

4bf

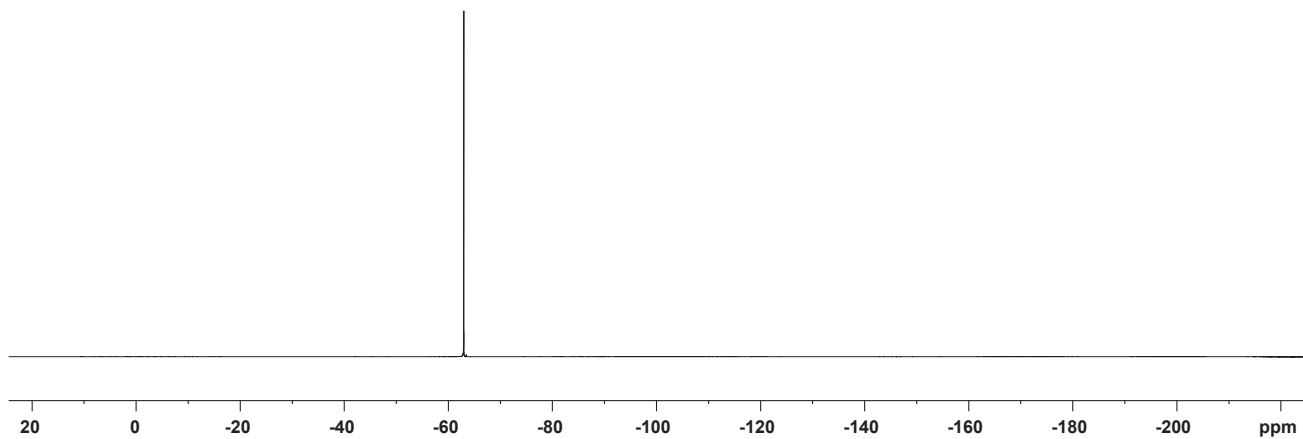

— 205.22

— 144.34

— 132.99

— 132.50

— 132.17

— 131.94

— 125.71

— 124.96

— 121.59

— 121.51

— 77.48

— 77.16

— 76.84

— 57.70

— 48.27

— 35.11

— 31.27

— 30.47

— 25.72

— 22.48

— 14.02

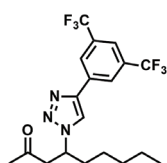

4-(4-(3,5-bis(trifluoromethyl)phenyl)-1H-1,2,3-triazol-1-yl)nonan-2-one

4bf

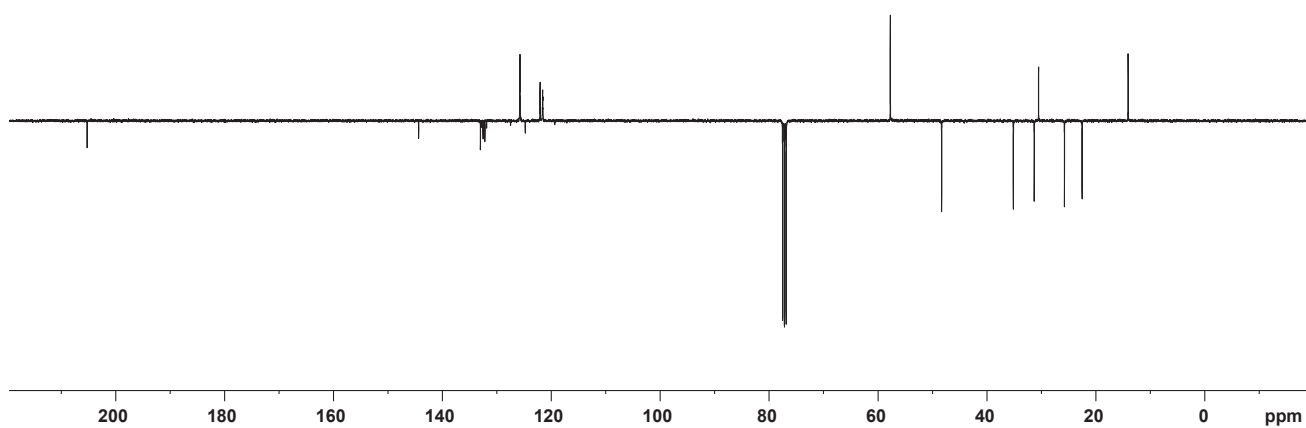



7.70  
7.64  
7.43  
7.42  
7.34  
7.26

4.91  
4.90  
4.89  
4.88  
4.87  
4.86

3.39  
3.37  
3.35  
3.33  
3.34  
2.93  
2.88  
2.88  
2.08  
2.03  
2.02  
2.01  
1.83  
1.83  
1.80  
1.77  
1.71  
1.08  
0.80

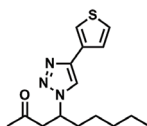

4-(4-(thiophen-3-yl)-1H-1,2,3-triazol-1-yl)nonan-2-one

4bg

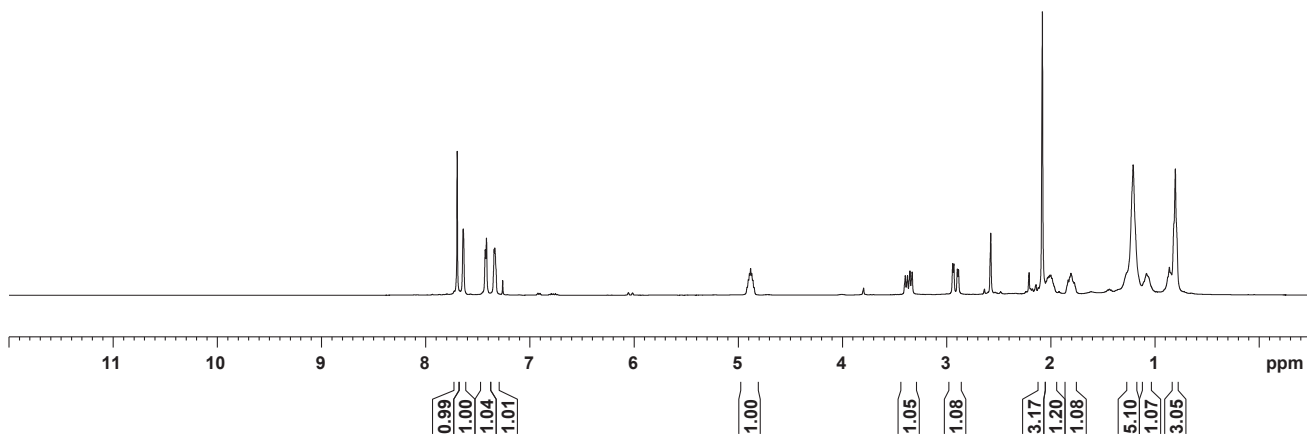

205.35

143.23  
131.99  
126.34  
125.91  
121.03  
120.49

77.47  
77.15  
76.83

57.24  
48.35

35.19  
31.26  
30.52  
25.64  
22.45

14.02

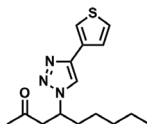

4-(4-(thiophen-3-yl)-1H-1,2,3-triazol-1-yl)nonan-2-one

4bg

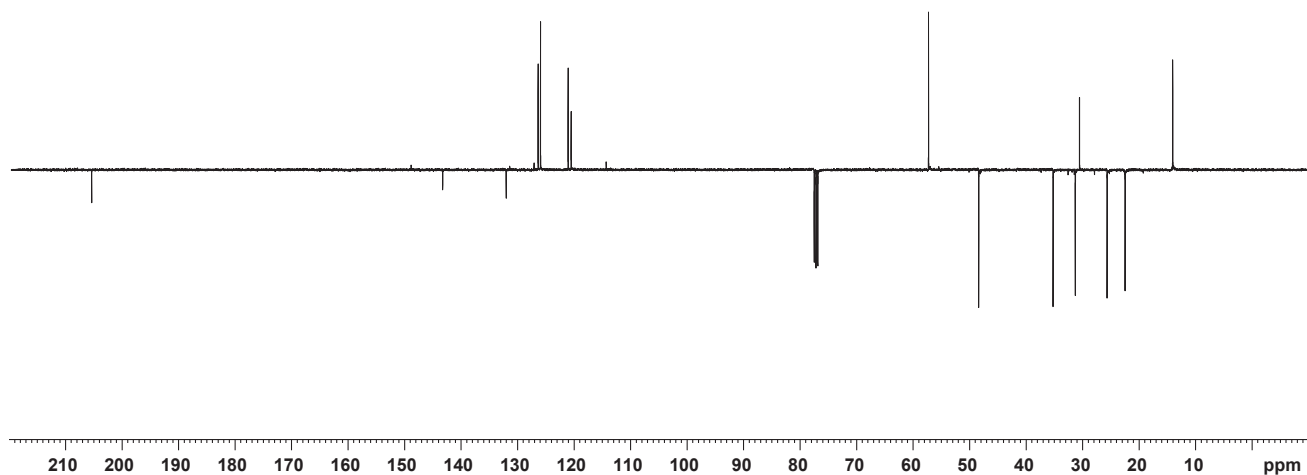

7.26  
4.86  
4.85  
4.83  
4.82  
4.81  
4.79  
4.39  
3.34  
3.30  
2.89  
2.89  
2.88  
2.86  
2.08  
2.08  
1.97  
1.96  
1.95  
1.94  
1.93  
1.91  
1.79  
1.76  
1.75  
1.74  
1.73  
1.71  
1.63  
1.59  
1.39  
1.36  
1.33  
1.17  
1.15  
1.13  
1.11  
1.09  
1.05  
0.92  
0.88  
0.87  
0.84

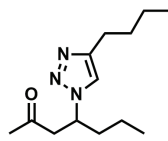

4-(4-butyl-1H-1,2,3-triazol-1-yl)heptan-2-one

4ah

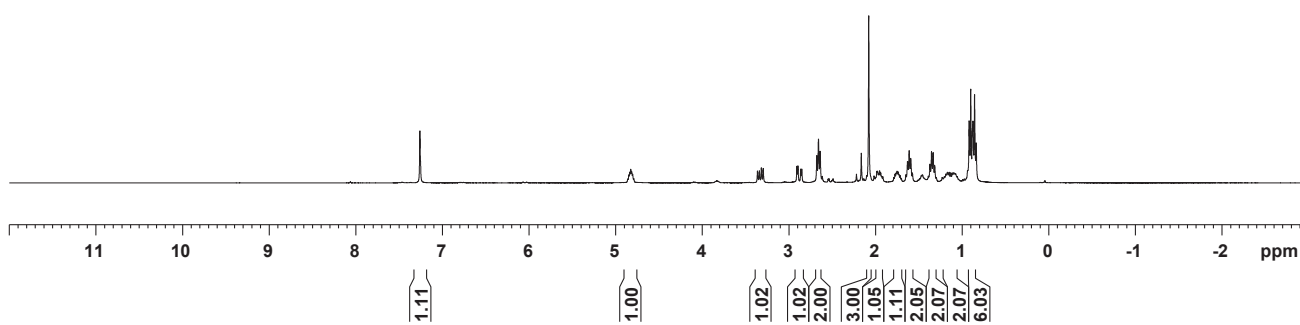

— 205.50

— 147.71

— 121.48

77.48  
77.16  
76.84

— 56.66

— 48.42

— 37.40

31.60

30.52

25.43

22.44

19.23

13.93

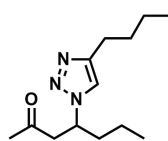

4-(4-butyl-1H-1,2,3-triazol-1-yl)heptan-2-one

4ah

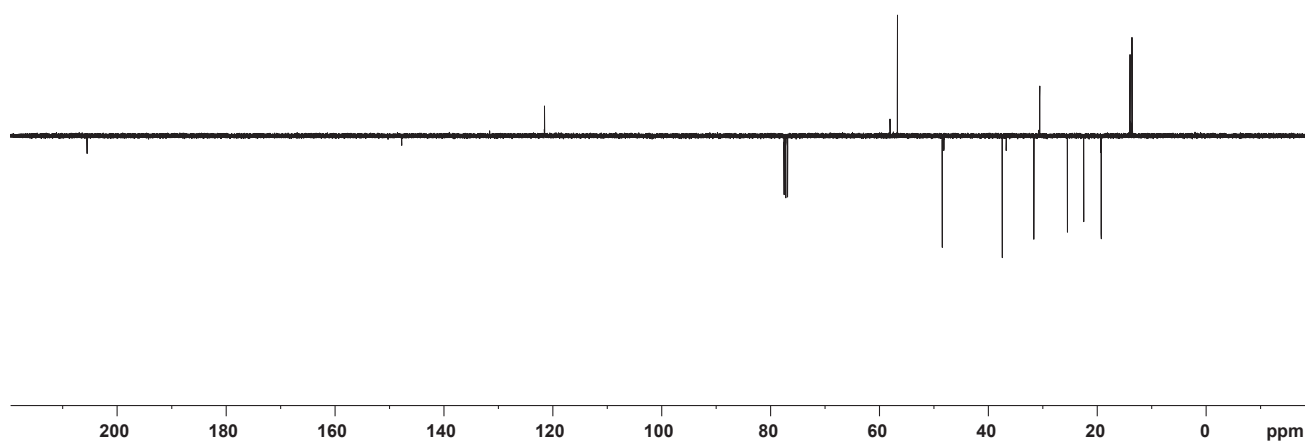

7.26  
4.85  
4.44  
4.43  
4.42  
4.40  
4.39  
4.37  
4.34  
3.30  
3.29  
3.08  
3.06  
3.05  
3.04  
3.03  
3.02  
3.01  
2.99  
2.98  
2.97  
2.96  
2.95  
2.94  
2.93  
2.92  
2.91  
1.90  
1.77  
1.76  
1.75  
1.74  
1.72  
1.71  
1.69  
1.68  
1.67  
1.66  
1.65  
1.64  
1.63  
1.62

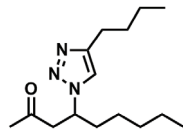

4-(4-butyl-1H-1,2,3-triazol-1-yl)nonan-2-one  
4bh

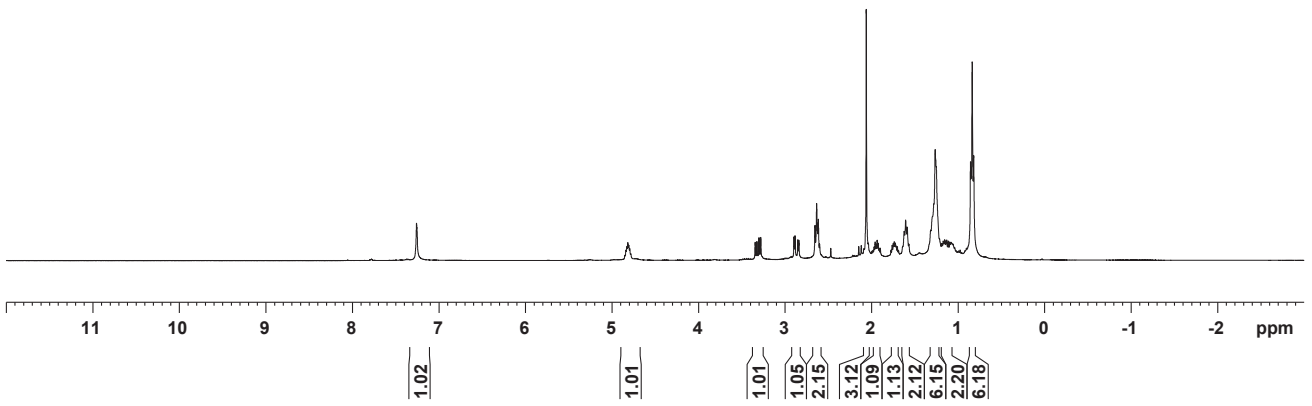

205.39

147.67

121.42

77.47  
77.16  
76.84

56.59

48.34

37.33  
37.18  
30.44  
29.21  
28.68  
28.58  
19.75  
14.07  
13.50

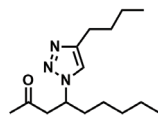

4-(4-butyl-1H-1,2,3-triazol-1-yl)nonan-2-one  
4bh

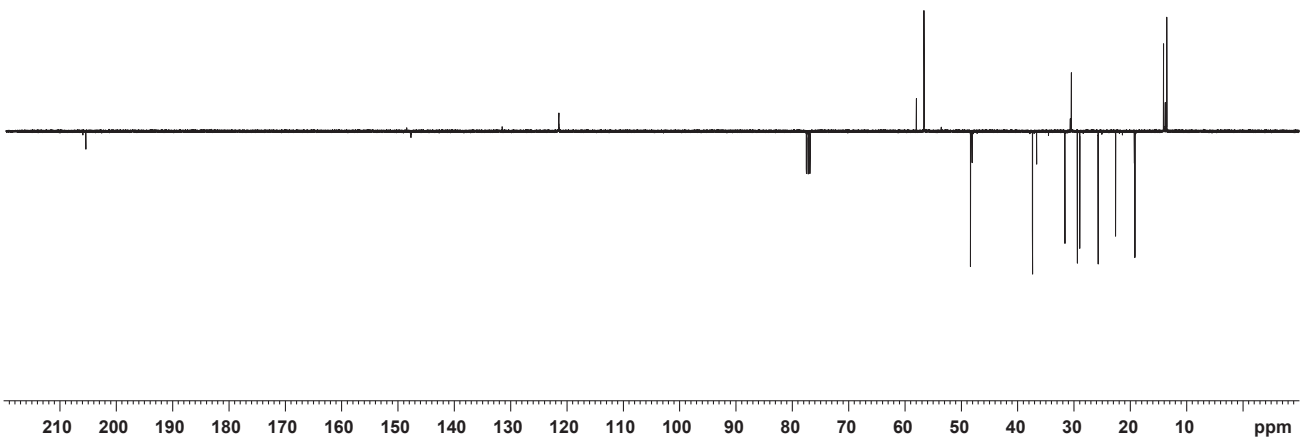

83.61  
 77.06  
 77.00  
 76.94  
 44.41  
 44.35  
 44.29  
 44.23  
 44.17  
 44.11  
 44.05  
 43.99  
 33.31  
 33.25  
 33.19  
 23.00  
 22.94  
 22.88  
 22.82  
 22.76  
 22.70  
 22.64  
 22.58  
 22.52  
 22.46  
 22.40  
 22.34  
 22.28  
 22.22  
 22.16  
 22.10  
 22.04  
 21.98  
 21.92  
 21.86  
 21.80  
 21.74  
 21.68  
 21.62  
 21.56  
 21.50  
 21.44  
 21.38  
 21.32  
 21.26  
 21.20  
 21.14  
 21.08  
 21.02  
 20.96  
 20.90  
 20.84  
 20.78  
 20.72  
 20.66  
 20.60  
 20.54  
 20.48  
 20.42  
 20.36  
 20.30  
 20.24  
 20.18  
 20.12  
 20.06  
 20.00  
 19.94  
 19.88  
 19.82  
 19.76  
 19.70  
 19.64  
 19.58  
 19.52  
 19.46  
 19.40  
 19.34  
 19.28  
 19.22  
 19.16  
 19.10  
 19.04  
 18.98  
 18.92  
 18.86  
 18.80  
 18.74  
 18.68  
 18.62  
 18.56  
 18.50  
 18.44  
 18.38  
 18.32  
 18.26  
 18.20  
 18.14  
 18.08  
 18.02  
 17.96  
 17.90  
 17.84  
 17.78  
 17.72  
 17.66  
 17.60  
 17.54  
 17.48  
 17.42  
 17.36  
 17.30  
 17.24  
 17.18  
 17.12  
 17.06  
 17.00  
 16.94  
 16.88  
 16.82  
 16.76  
 16.70  
 16.64  
 16.58  
 16.52  
 16.46  
 16.40  
 16.34  
 16.28  
 16.22  
 16.16  
 16.10  
 16.04  
 15.98  
 15.92  
 15.86  
 15.80  
 15.74  
 15.68  
 15.62  
 15.56  
 15.50  
 15.44  
 15.38  
 15.32  
 15.26  
 15.20  
 15.14  
 15.08  
 15.02  
 14.96  
 14.90  
 14.84  
 14.78  
 14.72  
 14.66  
 14.60  
 14.54  
 14.48  
 14.42  
 14.36  
 14.30  
 14.24  
 14.18  
 14.12  
 14.06  
 14.00  
 13.94  
 13.88  
 13.82  
 13.76  
 13.70  
 13.64  
 13.58  
 13.52  
 13.46  
 13.40  
 13.34  
 13.28  
 13.22  
 13.16  
 13.10  
 13.04  
 12.98  
 12.92  
 12.86  
 12.80  
 12.74  
 12.68  
 12.62  
 12.56  
 12.50  
 12.44  
 12.38  
 12.32  
 12.26  
 12.20  
 12.14  
 12.08  
 12.02  
 11.96  
 11.90  
 11.84  
 11.78  
 11.72  
 11.66  
 11.60  
 11.54  
 11.48  
 11.42  
 11.36  
 11.30  
 11.24  
 11.18  
 11.12  
 11.06  
 11.00  
 10.94  
 10.88  
 10.82  
 10.76  
 10.70  
 10.64  
 10.58  
 10.52  
 10.46  
 10.40  
 10.34  
 10.28  
 10.22  
 10.16  
 10.10  
 10.04  
 9.98  
 9.92  
 9.86  
 9.80  
 9.74  
 9.68  
 9.62  
 9.56  
 9.50  
 9.44  
 9.38  
 9.32  
 9.26  
 9.20  
 9.14  
 9.08  
 9.02  
 8.96  
 8.90  
 8.84  
 8.78  
 8.72  
 8.66  
 8.60  
 8.54  
 8.48  
 8.42  
 8.36  
 8.30  
 8.24  
 8.18  
 8.12  
 8.06  
 8.00  
 7.94  
 7.88  
 7.82  
 7.76  
 7.70  
 7.64  
 7.58  
 7.52  
 7.46  
 7.40  
 7.34  
 7.28  
 7.22  
 7.16  
 7.10  
 7.04  
 6.98  
 6.92  
 6.86  
 6.80  
 6.74  
 6.68  
 6.62  
 6.56  
 6.50  
 6.44  
 6.38  
 6.32  
 6.26  
 6.20  
 6.14  
 6.08  
 6.02  
 5.96  
 5.90  
 5.84  
 5.78  
 5.72  
 5.66  
 5.60  
 5.54  
 5.48  
 5.42  
 5.36  
 5.30  
 5.24  
 5.18  
 5.12  
 5.06  
 5.00  
 4.94  
 4.88  
 4.82  
 4.76  
 4.70  
 4.64  
 4.58  
 4.52  
 4.46  
 4.40  
 4.34  
 4.28  
 4.22  
 4.16  
 4.10  
 4.04  
 3.98  
 3.92  
 3.86  
 3.80  
 3.74  
 3.68  
 3.62  
 3.56  
 3.50  
 3.44  
 3.38  
 3.32  
 3.26  
 3.20  
 3.14  
 3.08  
 3.02  
 2.96  
 2.90  
 2.84  
 2.78  
 2.72  
 2.66  
 2.60  
 2.54  
 2.48  
 2.42  
 2.36  
 2.30  
 2.24  
 2.18  
 2.12  
 2.06  
 2.00  
 1.94  
 1.88  
 1.82  
 1.76  
 1.70  
 1.64  
 1.58  
 1.52  
 1.46  
 1.40  
 1.34  
 1.28  
 1.22  
 1.16  
 1.10  
 1.04  
 1.00  
 0.94  
 0.88  
 0.82  
 0.76  
 0.70  
 0.64  
 0.58  
 0.52  
 0.46  
 0.40  
 0.34  
 0.28  
 0.22  
 0.16  
 0.10  
 0.04  
 0.00  
 -0.04  
 -0.08  
 -0.12  
 -0.16  
 -0.20  
 -0.24  
 -0.28  
 -0.32  
 -0.36  
 -0.40  
 -0.44  
 -0.48  
 -0.52  
 -0.56  
 -0.60  
 -0.64  
 -0.68  
 -0.72  
 -0.76  
 -0.80  
 -0.84  
 -0.88  
 -0.92  
 -0.96  
 -1.00  
 -1.04  
 -1.08  
 -1.12  
 -1.16  
 -1.20  
 -1.24  
 -1.28  
 -1.32  
 -1.36  
 -1.40  
 -1.44  
 -1.48  
 -1.52  
 -1.56  
 -1.60  
 -1.64  
 -1.68  
 -1.72  
 -1.76  
 -1.80  
 -1.84  
 -1.88  
 -1.92  
 -1.96  
 -2.00  
 -2.04  
 -2.08  
 -2.12  
 -2.16  
 -2.20  
 -2.24  
 -2.28  
 -2.32  
 -2.36  
 -2.40  
 -2.44  
 -2.48  
 -2.52  
 -2.56  
 -2.60  
 -2.64  
 -2.68  
 -2.72  
 -2.76  
 -2.80  
 -2.84  
 -2.88  
 -2.92  
 -2.96  
 -3.00

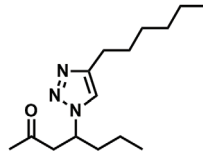

4-(4-hexyl-1H-1,2,3-triazol-1-yl)heptan-2-one

4ai

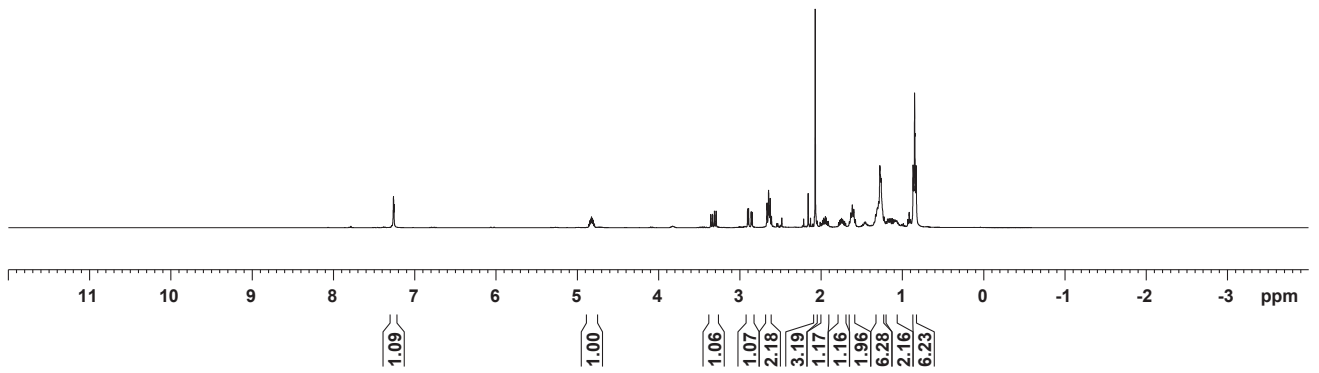

205.42

128.84

121.51

77.47  
77.16  
76.84

56.62

48.37

37.35

31.07

30.49

28.97

26.72

22.60

19.17

14.10

13.52

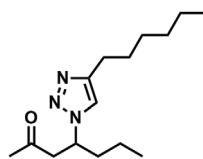

4-(4-hexyl-1H-1,2,3-triazol-1-yl)heptan-2-one

4ai

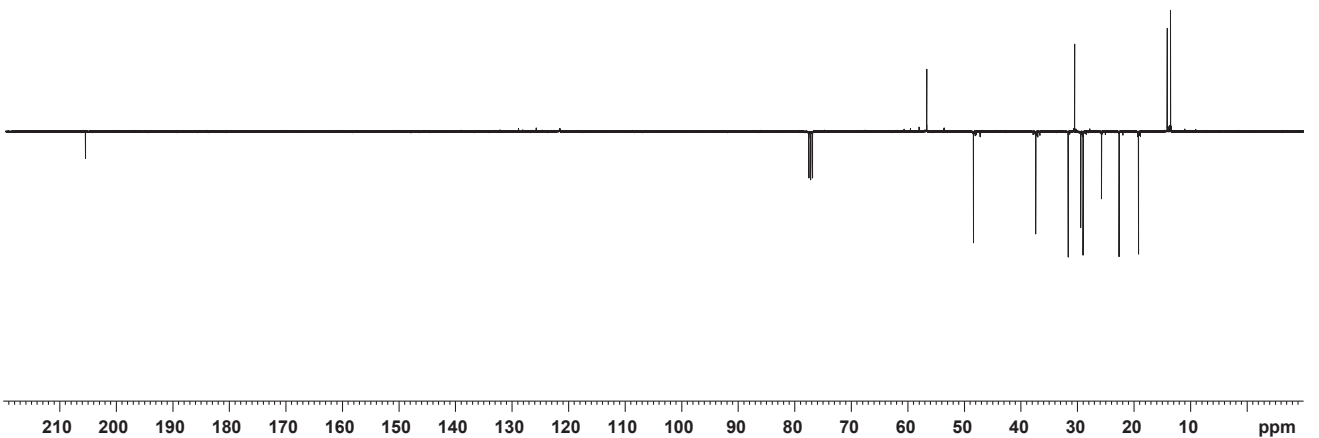



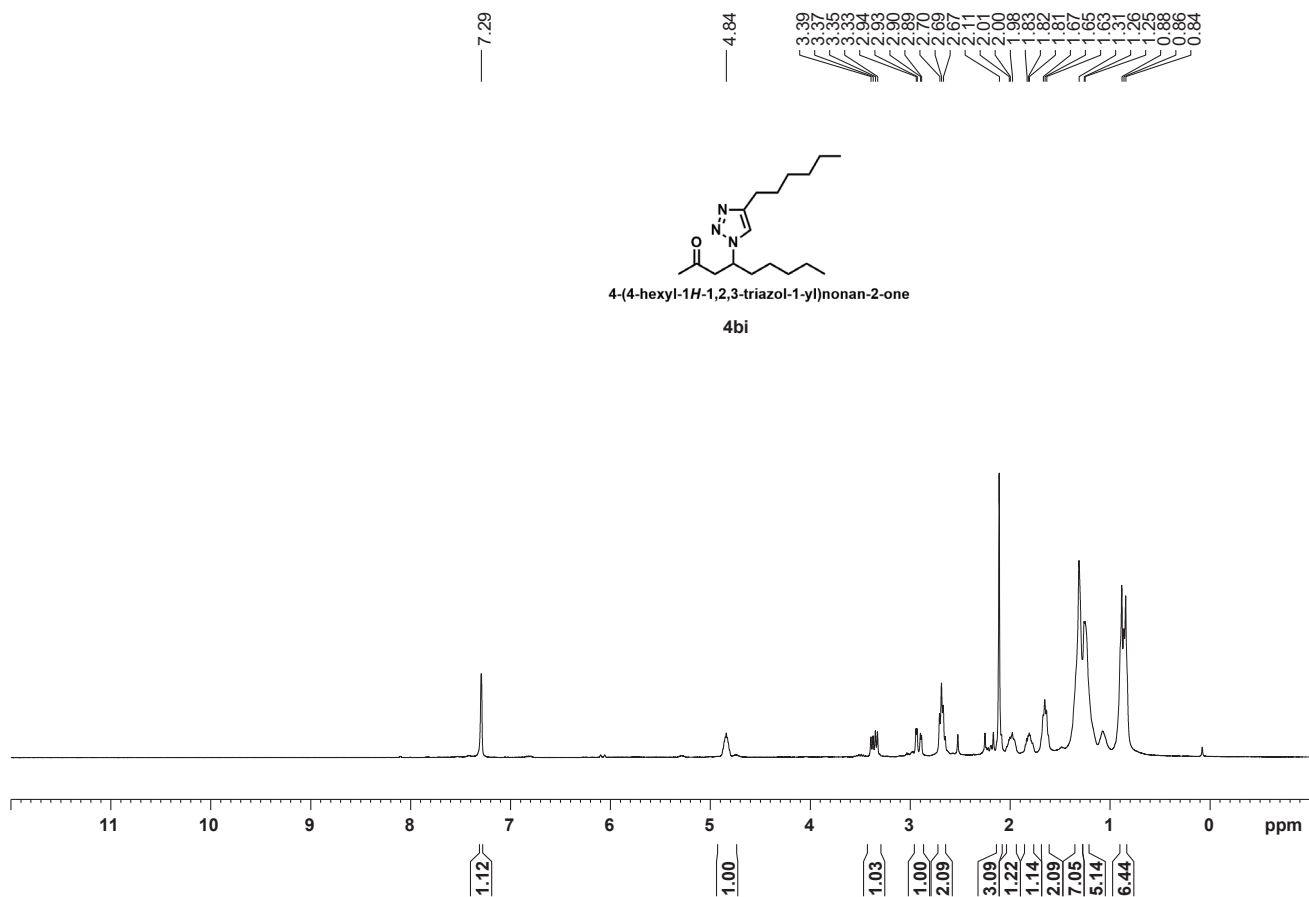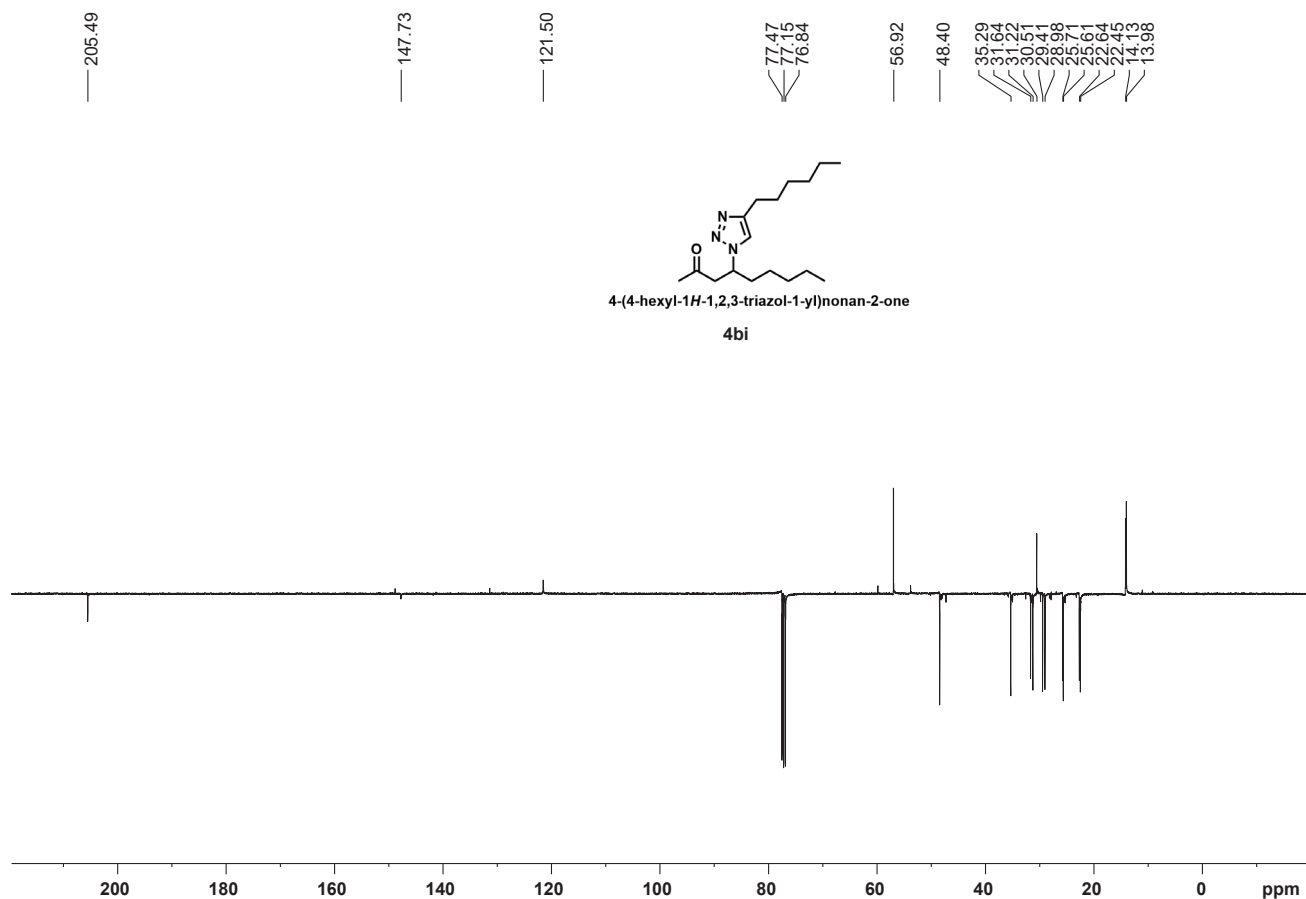

7.26  
7.24  
4.88  
4.86  
4.85  
4.84  
4.83  
4.82  
4.81  
3.98  
3.96  
3.93  
3.92  
3.91  
3.90  
3.89  
3.88  
3.87  
3.86  
3.85  
3.84  
3.83  
3.82  
3.81  
3.80  
3.79  
3.78  
3.77  
3.76  
3.75  
3.74  
3.73  
3.72  
3.71  
3.70  
3.69  
3.68  
3.67  
3.66  
3.65  
3.64  
3.63  
3.62  
3.61  
3.60  
3.59  
3.58  
3.57  
3.56  
3.55  
3.54  
3.53  
3.52  
3.51  
3.50  
3.49  
3.48  
3.47  
3.46  
3.45  
3.44  
3.43  
3.42  
3.41  
3.40  
3.39  
3.38  
3.37  
3.36  
3.35  
3.34  
3.33  
3.32  
3.31  
3.30  
3.29  
3.28  
3.27  
3.26  
3.25  
3.24  
3.23  
3.22  
3.21  
3.20  
3.19  
3.18  
3.17  
3.16  
3.15  
3.14  
3.13  
3.12  
3.11  
3.10  
3.09  
3.08  
3.07  
3.06  
3.05  
3.04  
3.03  
3.02  
3.01  
3.00  
2.99  
2.98  
2.97  
2.96  
2.95  
2.94  
2.93  
2.92  
2.91  
2.90  
2.89  
2.88  
2.87  
2.86

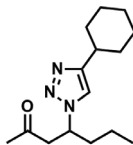

4-(4-cyclohexyl-1H-1,2,3-triazol-1-yl)heptan-2-one

4aj

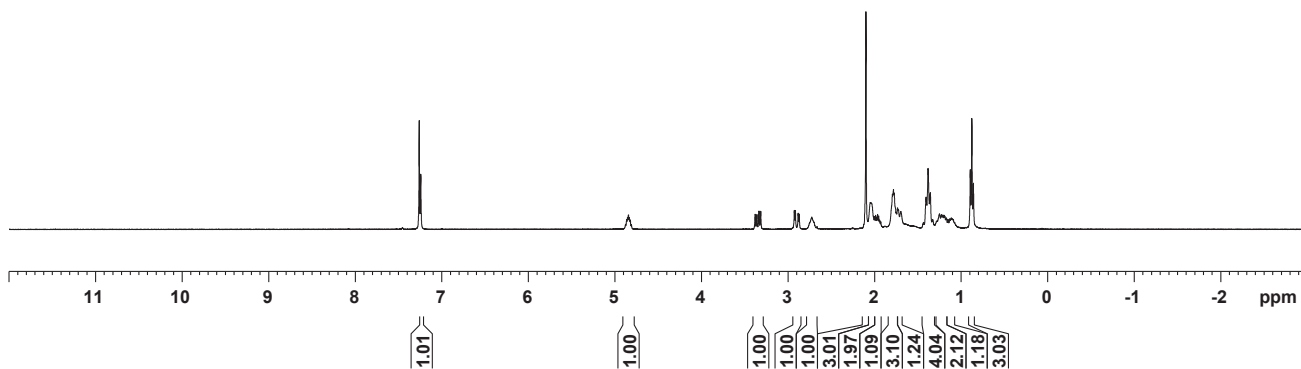

205.56

153.04

120.14

77.48  
77.00  
76.84

56.72

48.45

37.48  
35.37  
33.13

26.29  
26.21

19.29

13.63

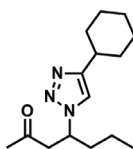

4-(4-cyclohexyl-1H-1,2,3-triazol-1-yl)heptan-2-one

4aj

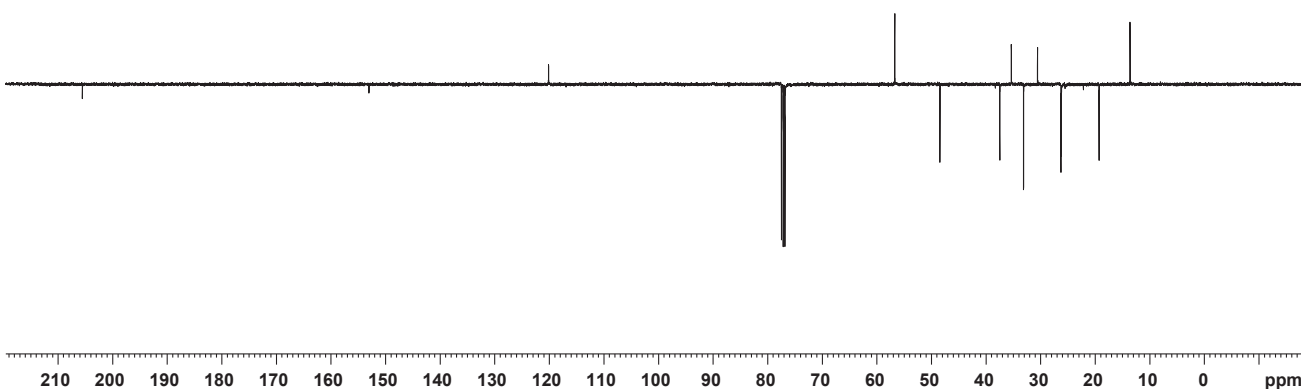

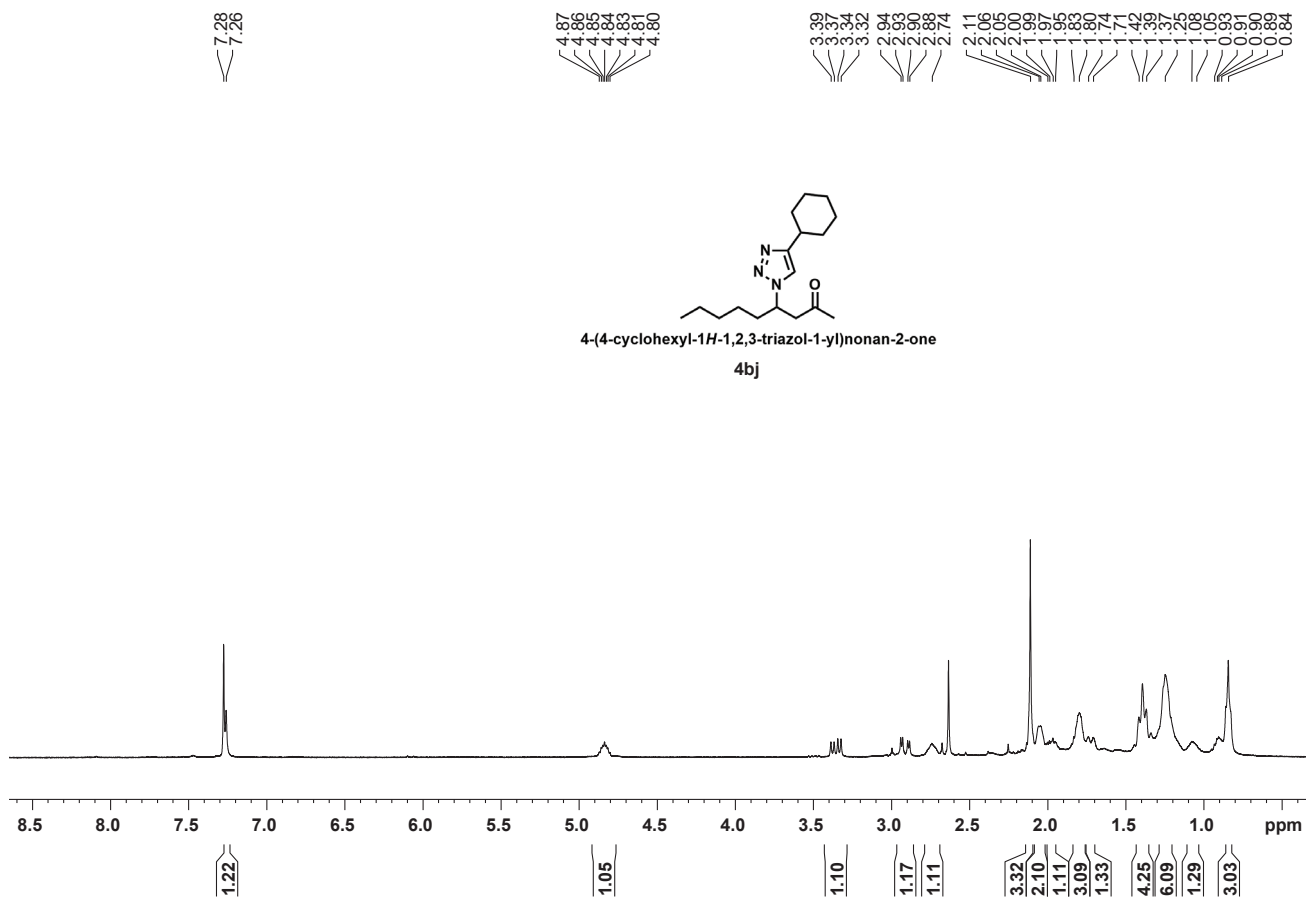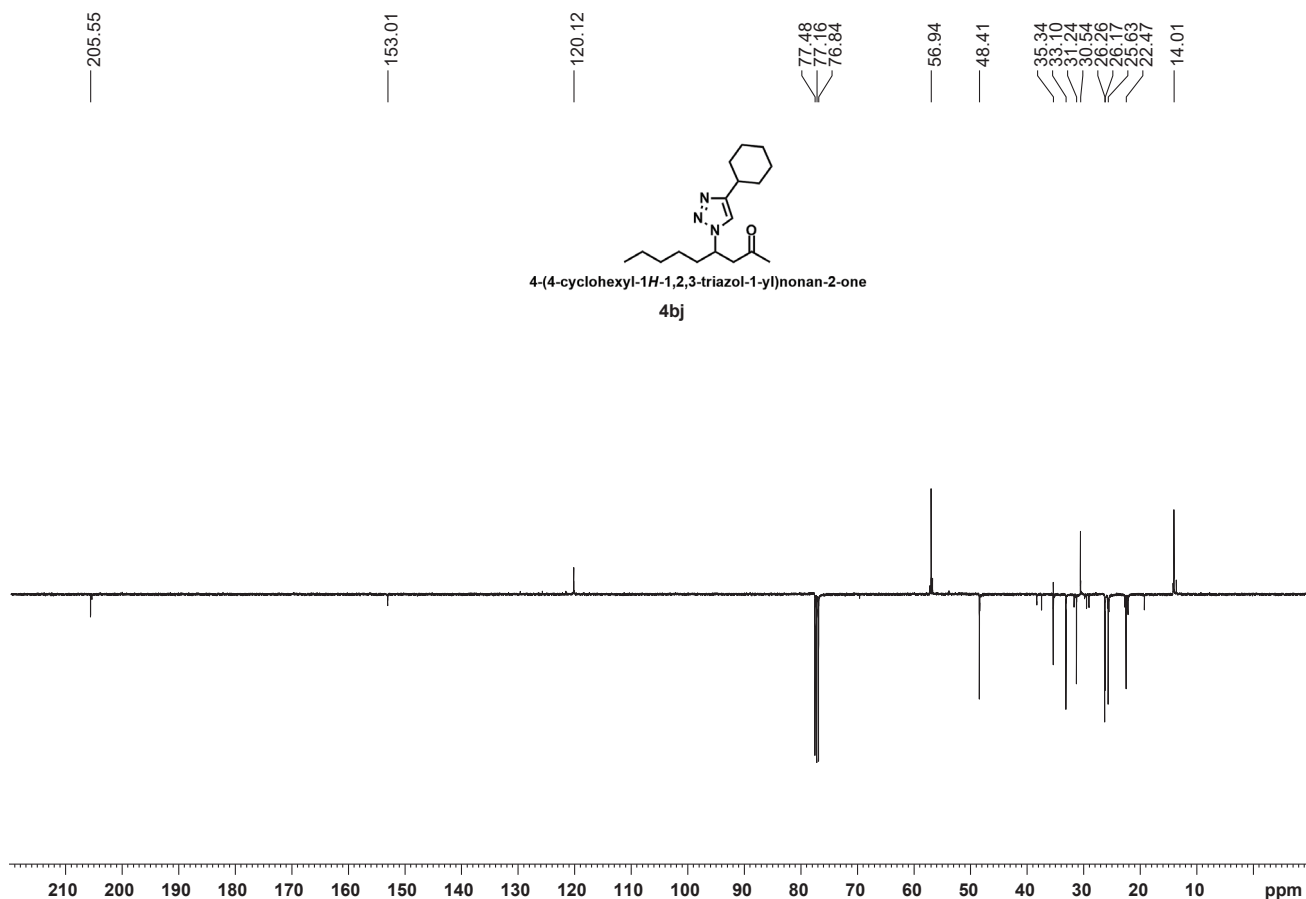

Supplement: d2gc04672e1.pdf [file d2gc04672e1.pdf]
